# Supplementary material
Source: PubMed Central journal article supplement (PMC2951481)
Supplement: NIHMS238672-supplement-1_si_001.pdf [file NIHMS238672-supplement-1_si_001.pdf]

# Synthesis of Heterocycles via Pd-Ligand Controlled Cyclization of 2-Chloro-*N*-(2-vinyl)aniline: Preparation of Carbazoles, Indoles, Dibenzazepines and Acridines

Dmitry Tselikhovsky and Stephen L. Buchwald\*

Department of Chemistry, Massachusetts Institute of Technology, 77 Massachusetts Avenue, Cambridge Massachusetts 02139

## *Supporting Information*

### ***General Reagent Information***

All reagents were used as received unless otherwise noted. 1,4-Dioxane was purchased from Aldrich Chemical Company in Sure-Seal bottle. Anhydrous toluene was purchased from J. T. Baker in CYCLE-TAINER® solvent delivery kegs. The solvent was further purified by passing it through two packed columns of neutral alumina under argon. Flash column chromatography was performed using a Biotage SP4 Flash Purification System using KP-Sil flash cartridges. Pd<sub>2</sub>(dba)<sub>3</sub>, Pd(OAc)<sub>2</sub> and Cu(OAc)<sub>2</sub> were purchased from Sigma-Aldrich and used as received. 2-Bromostyrene 97.0% (Alfa Aesar, used as received). Derivates of 2-bromostyrene (1-bromo-4-methoxy-2-vinylbenzene and 4-bromo-2-methoxy-5-vinylphenol) that not commercially available, were prepared based on literature procedure.<sup>1</sup> Ligands **L2-3**, **L8** and **L10-11** were purchased from Strem Chemicals, Inc., Ligands **L1**, **L7** and **L9** were synthesized according to the methods described in literature.<sup>2</sup> Ligands **L4-6** were purchased from Sigma-Aldrich and used as received. All amines were purchased from Alfa Aesar and Sigma-Aldrich and used as received, sodium *tert*-butoxide was purchased from Sigma-Aldrich and stored in an inert atmosphere glovebox.

### ***S1. General Experimental Details.***

All reactions requiring a dry and inert atmosphere were performed in glassware flame-dried or dried overnight in a 110 °C oven, sealed with septa and flushed with Argon. 1,4-Dioxane was purged with argon before use. Infrared spectra were recorded on a Perkin-Elmer Model 2000 FT-IR. <sup>1</sup>H, <sup>19</sup>F and <sup>13</sup>C NMR spectra were obtained in CDCl<sub>3</sub> at 25 °C on a Bruker AVANCE spectrometer at the following frequencies: 400 MHz (<sup>1</sup>H), 100

MHz ( $^{13}\text{C}$ ) and 282 MHz ( $^{19}\text{F}$ ). All  $^1\text{H}$  NMR experiments are reported in ppm downfield of TMS and were measured relative to the signals for chloroform (7.27 ppm). All  $^{13}\text{C}$  NMR spectra were reported in ppm relative to residual chloroform (77 ppm). Gas chromatographic analyses were performed on Hewlett-Packard 6890 gas chromatography instrument with a FID detector using HP 10m x 0.10 mm capillary column.

## General Procedure 1:

### *Synthesis of diarylamine intermediates (Table 2)*

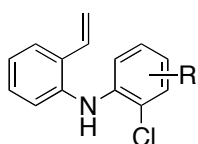

Generally, 0.025 mmol (13.5 mg) of BrettPhos<sup>2</sup>, 0.0075 mmol (6.9 mg) of  $\text{Pd}_2(\text{dba})_3$ , 3.0 mmol (288 mg) of  $\text{NaOtBu}$  and 1.2 mmol of the appropriate substituted 2-chloroaniline (if solid) were mixed in oven-dried schlenk tube and degassed. Flask was refilled with argon (repeated 3-5 times) and 1.0 mmol (182 mg, 130  $\mu\text{L}$ ) of 2-Bromostyrene in degassed dioxane (1 mL) was added under an argon atmosphere (liquid amines were added with 2-bromostyrene in the same manner). The tube was then placed in a preheated oil bath at  $110^\circ\text{C}$ , and mixture was stirred until completion of the reaction (followed by GC analysis). After cooled down to room temperature, the solution was quenched with water (5 mL) and diluted with ethyl acetate (10 mL). Organic layer was dried on  $\text{Na}_2\text{SO}_4$  and filtered. After concentration under reduced pressure, the crude mixture was purified, either by silica gel chromatography, or by Biotage SP4 technique, eluting with hexanes/ethyl acetate mixtures to afford desired intermediate. Products were characterized by analysis of their characteristic IR, MS, and NMR spectra.

## General Procedure 2:

### *A. Synthesis of dibenzazepines from diarylamine intermediates:*

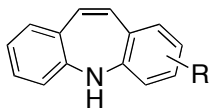

Typically, unless otherwise noted, 0.0225 mmol (8.8 mg) of DavePhos, 0.0075 mmol (6.9 mg) of  $\text{Pd}_2(\text{dba})_3$ , 1.5 mmol (144 mg) of  $\text{NaOtBu}$  and 1.0 mmol of the appropriate diarylamine intermediate (if solid) were mixed in oven-dried schlenk tube and degassed. Flask was refilled with argon (repeated 3-5 times) and degassed dioxane (1 mL) was added under an argon atmosphere (liquid intermediates were added with dioxane in same manner). The tube was then

placed in a preheated oil bath at 110°C, and mixture was stirred until completion of the reaction (followed by GC analysis). After cooled down to room temperature, the solution was quenched with water (5 mL) and diluted with ethyl acetate (10 mL). Organic layer was separated and dried on Na<sub>2</sub>SO<sub>4</sub>, then filtered. After concentration under reduced pressure, the crude mixture was purified, either by silica gel chromatography, or by Biotage SP4 technique, eluting with hexanes/ethyl acetate mixtures to afford pure dibenzazepines, as yellow/orange solids. Products were characterized either by direct comparison with authentic samples, obtained by synthetic routes described in the literature,<sup>3</sup> or by analysis of their characteristic IR, MS, and NMR spectra.

### General Procedure 3:

#### *Synthesis of 9-methylacridines (Table 3)*

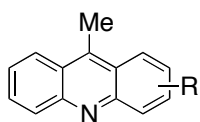

Generally, 0.075 mmol (21.8 mg) of tri-*tert*-butylphosphonium tetrafluoroborate, 0.025 mmol (22.9 mg) of Pd<sub>2</sub>(dba)<sub>3</sub>, 1.5 mmol (144 mg) of NaOtBu and 1.0 mmol of the appropriate diarylamine intermediate (if solid) were mixed in oven-dried schlenk tube and degassed. Flask was refilled with argon (repeated 3-5 times) and degassed toluene (1 mL) was added under an argon atmosphere (liquid intermediates were added with toluene in same manner). Reaction mixture was then placed in a preheated oil bath at 110°C, and mixture was stirred until completion of the reaction (followed by GC analysis). After cooled down to room temperature, the solution was quenched with water (5 mL) and diluted with ethyl acetate (15 mL). Organic layer was separated and dried on Na<sub>2</sub>SO<sub>4</sub>, then filtered. After concentration under reduced pressure, the crude mixture was purified, either by silica gel chromatography, or by Biotage SP4 technique, eluting with hexanes/ethyl acetate mixtures to afford desired light yellow acridines. Products were characterized by analysis of their characteristic IR, MS, and NMR spectra.

#### General Procedure 4:

##### *Synthesis of vinyl-9H-carbazoles (Table 3)*

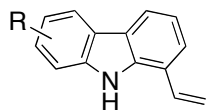

Generally, 0.06 mmol (23.9 mg) of racemic-2-di-*t*-butylphosphino-1,1'-binaphthyl, 0.02 mmol (18.3 mg) of  $\text{Pd}_2(\text{dba})_3$ , 1.5 mmol (144 mg) of  $\text{NaOtBu}$  and 1.0 mmol of the appropriate diarylamine intermediate were mixed in oven-dried schlenk tube and degassed. Tube was refilled with argon (repeated 3-5 times) and degassed dioxane (1 mL) was added under an argon atmosphere. Reaction mixture was then placed in a preheated oil bath at  $110^\circ\text{C}$ , and mixture was stirred until completion of the reaction (followed by GC analysis). After cooled down to room temperature, the solution was quenched with water (5 mL) and diluted with ethyl acetate (15 mL). Organic layer was dried on  $\text{Na}_2\text{SO}_4$  and filtered. After concentration under reduced pressure, the crude mixture was purified, either by silica gel chromatography, or by Biotage SP4 technique, eluting with hexanes/ethyl acetate or hexanes/diethyl ether mixtures to afford desired white carbazole. Products were characterized by analysis of their characteristic IR, MS, and NMR spectra.

#### General Procedure 5:

##### *Synthesis of 2-chlorophenyl-1H-indoles (Table 4)*

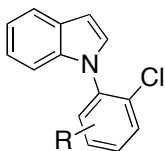

Generally, 0.10 mmol (22.4 mg) of  $\text{Pd}(\text{OAc})_2$ , 1.5 mmol (272.5 mg) of  $\text{Cu}(\text{OAc})_2$  and 1.0 mmol of the appropriate diarylamine intermediate were mixed in schlenk tube. DMF (3 mL) and acetic acid (1 mL) were added. Reaction mixture was then placed in a preheated oil bath at  $110^\circ\text{C}$ , and mixture was stirred until completion of the reaction (followed by GC analysis). After cooled down to room temperature, the solution was quenched with saturated  $\text{NaHCO}_3$  (5 mL), water (10 mL) and diluted with ethyl acetate (15 mL). Organic layer was dried on  $\text{Na}_2\text{SO}_4$  and filtered. After concentration under reduced pressure, the crude mixture was purified, either by silica gel chromatography, or by Biotage SP4 technique, eluting with hexanes/ethyl acetate mixtures to afford desired *N*-arylindole. Products were characterized by analysis of their characteristic IR, MS, and NMR spectra.

## General Procedure 6:

### A. One-pot synthesis of dibenzazepines (Table 1):

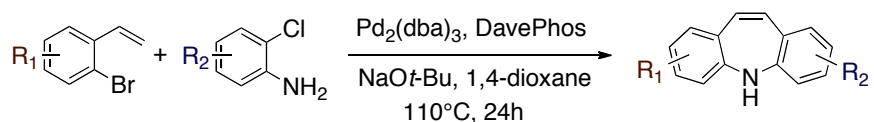

Typically, unless otherwise noted, 0.0225 mmol (8.8 mg) of DavePhos, 0.0075 mmol (6.9 mg) of Pd<sub>2</sub>(dba)<sub>3</sub>, 3.0 mmol (288 mg) of NaOtBu and 1.2 mmol of the appropriate substituted 2-chloroaniline (if solid) were mixed in oven-dried schlenk tube and degassed. Flask was refilled with argon (repeated 3-5 times) and 1.0 mmol (182 mg, 130  $\mu$ L) of 2-Bromostyrene in degassed dioxane (1 mL) was added under an argon atmosphere (liquid amines were added with 2-bromostyrene in same manner). The tube was then placed in a preheated oil bath at 110°C, and mixture was stirred until completion of the reaction (followed by GC analysis).

### B. One-pot synthesis of dibenzazepinones (Table 1):

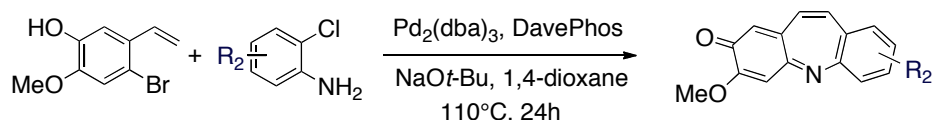

0.08 mmol (31.4 mg) of DavePhos, 0.025 mmol (22.9 mg) of Pd<sub>2</sub>(dba)<sub>3</sub>, 3.0 mmol (288 mg) of NaOtBu, 1.2 mmol of the appropriate substituted 2-chloroaniline and 1.0 mmol (229 mg) of 4-bromo-2-methoxy-5-vinylphenol were mixed in oven-dried schlenk tube and degassed. Tube was refilled with argon (repeated 3-5 times) and 1 mL of dry 1,4-dioxane was added under an argon atmosphere. The flask was then placed in a preheated oil bath at 120°C, and mixture was stirred until completion of the reaction (followed by GC analysis).

Continue for A. and B. After cooled down to room temperature, the solution was quenched with water (5 mL) and diluted with ethyl acetate (10 mL). Organic layer was dried on Na<sub>2</sub>SO<sub>4</sub> and filtered. After concentration under reduced pressure, the crude mixture was purified, either by silica gel chromatography, or by Biotage SP4 technique,

eluting with hexanes/ethyl acetate mixtures to afford pure dibenzazepines or dibenzazepinones, as yellow/orange or red solids respectively. Products were characterized either by direct comparison with authentic samples, obtained by synthetic routes described in the literature,<sup>3</sup> or by analysis of their characteristic IR, MS, and NMR spectra.

### General Procedure 7:

#### *Preparation of substituted 2-bromostyrenes:*

To a suspension of 13.2g (37 mmol)  $\text{CH}_3\text{PPh}_3\text{Br}$  in 50 mL THF (oven-dried and degassed flask) was added a solution of 4.14g (37 mmol)  $\text{KO}t\text{-Bu}$  in 50 mL THF in  $0^\circ\text{C}$ . The mixture was stirred for 1 hour at  $0^\circ\text{C}$  and to yellow suspension was added an aldehyde (23 mmol) in 20 mL of dry THF under an argon atmosphere. The ice bath was removed and mixture stirred for 20 hours. Saturated ammonium chloride (60 mL) was added and mixture was stirred for additional 10 minutes. Resultant mixture was extracted with  $\text{Et}_2\text{O}$  ( $100\text{ mL} \times 3$ ). The combined organic layer was dried ( $\text{Na}_2\text{SO}_4$ ) and concentrated. The residue was purified by flash column chromatography ( $\text{EtOAc}$ /hexanes mixtures) to afford **8** and **9**.

### Experimental data for compounds described in Table 2

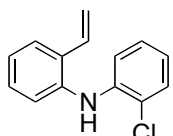

#### **2-Chloro-N-(2-vinylphenyl)aniline (7)**

According to *General Procedure 1*, a solution of 1.2 mmol (153.6 mg) 2-chloroaniline, 1.0 mmol (182 mg) of 2-bromostyrene, 1.0 mmol (182 mg) of 2-bromostyrene, 0.025 mol (13.5 mg) of BrettPhos, 0.0075 mol% (6.9 mg) of  $\text{Pd}_2(\text{dba})_3$  and 3.0 mmol (288 mg) of  $\text{NaOtBu}$  in 1 mL of 1,4-dioxane was heated at  $110^\circ\text{C}$  for 1 hour. The crude was purified using Biotage SP4 (100% hexanes) to provide a pure adduct as colorless oil (203 mg, 91%).  **$^1\text{H}$  NMR (400 MHz,  $\text{CDCl}_3$ )**  $\delta$ : 7.56-7.58 (d,  $J = 8.4$  Hz, 1H), 7.33-7.36 (dd,  $J_1 = 8.0$  Hz,  $J_2 = 1.2$  Hz, 1H), 7.23-7.27 (m, 2H), 7.13-7.17 (m, 1H), 7.05-7.09 (t,  $J = 8.4$  Hz, 1H), 6.85-6.92 (dd,  $J_1 = 17.6$  Hz,  $J_2 = 10.8$  Hz, 1H), 6.88-6.90 (d,  $J = 8.4$  Hz, 1H), 6.74-6.78 (t,  $J = 8.0$  Hz, 1H), 5.98 (s, 1H), 5.71-5.76 (d,  $J = 17.6$  Hz, 1H), 5.31-5.34 (d,  $J = 11.2$  Hz, 1H) ppm.  **$^{13}\text{C}$  NMR (100 MHz,  $\text{CDCl}_3$ )**

$\delta$ : 141.35, 138.42, 132.51, 132.31, 129.56, 128.72, 127.49, 126.97, 124.44, 123.21, 120.72, 119.74, 116.40, 115.10 ppm. **IR (KBr disc,  $\text{cm}^{-1}$ ):** 3401, 3064, 1591, 1501, 1455, 1315, 1034, 743. Anal. Calc. for  $\text{C}_{14}\text{H}_{12}\text{ClN}$ : C, 73.20; H, 5.27. Found: C, 73.47; H, 5.52.

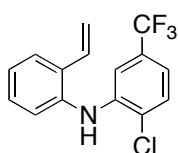

### 2-chloro-5-(trifluoromethyl)-N-(2-vinylphenyl)aniline

According to *General Procedure 1*, a solution of 1.2 mmol (234 mg) of 2-chloro-5-(trifluoromethyl)aniline, 1.0 mmol (182 mg) of 2-bromostyrene, 0.025 mol (13.5 mg) of BrettPhos, 0.0075 mol% (6.9 mg) of  $\text{Pd}_2(\text{dba})_3$  and 3.0 mmol (288 mg) of  $\text{NaOtBu}$  in 1 mL of 1,4-dioxane was heated at  $110^\circ\text{C}$  for 4 hours. The crude was purified using Biotage SP4 (15/85% EtOAc/hexanes mixture) to provide a pure adduct as a light yellow oil (193 mg, 65%).  **$^1\text{H}$  NMR (400 MHz,  $\text{CDCl}_3$ )**  $\delta$ : 7.58-7.60 (d,  $J = 7.6$  Hz, 1H), 7.281-7.323 (t,  $J = 7.6$  Hz, 1H), 7.19-7.25 (m 2H), 7.00 (s, 2H), 6.95-6.97 (dd,  $J_1 = 8.0$   $J_2 = 1.6$  Hz, 1H), 6.77-6.84 (dd,  $J_1 = 17.6$ ,  $J_2 = 11.2$ , 1H), 6.10 (s, 1H), 5.71-5.76 (d,  $J = 18.8$ , 1H), 5.30-5.33 (d,  $J = 12$ , 1H) ppm.  **$^{13}\text{C}$  NMR (100 MHz,  $\text{CDCl}_3$ )** Due to the complexity of the spectra all the peaks are listing without take into consideration C-F couplings,  $\delta$ : 142.04, 137.05, 133.18, 132.22, 130.21, 129.84, 129.00, 127.21, 125.67, 125.14, 124.23, 123.30, 122.43, 116.86, 115.67, 115.63, 110.82, 110.79 ppm.  **$^{19}\text{F}$  NMR (282 MHz,  $\text{CDCl}_3$ )**  $\delta$ : -113.654. **IR (KBr disc,  $\text{cm}^{-1}$ ):** 3410, 1587, 1511, 1436, 1334, 1274, 1170, 1127, 1080, 767. Anal. Calc. for  $\text{C}_{14}\text{H}_{14}\text{ClN}_3$ : C, 60.52; H, 3.72; N, 4.70. Found: C, 60.76; H, 3.62; N, 4.64.

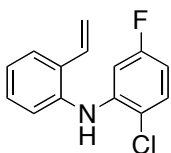

### 2-Chloro-5-fluoro-N-(2-vinylphenyl)aniline

Following *General Procedure 1*, a solution of 1.2 mmol (175.2 mg) of 2-chloro-5-fluoroaniline, 1.0 mmol (182 mg, 130  $\mu\text{L}$ ) of 2-bromostyrene, 0.025 mol (13.5 mg) of BrettPhos, 0.0075 mol% (6.9 mg) of  $\text{Pd}_2(\text{dba})_3$  and 3.0 mmol (288 mg) of  $\text{NaOtBu}$  in 1 mL of 1,4-dioxane was heated at  $110^\circ\text{C}$  for 4 hours. The crude was purified using Biotage SP4 (5/95% EtOAc/hexanes mixture) to provide a pure adduct as light yellow oil (166 mg, 67%).  **$^1\text{H}$  NMR (400 MHz,  $\text{CDCl}_3$ )**  $\delta$ : 7.56-7.58 (d,  $J = 7.6$  Hz, 1H), 7.17-7.30 (m, 4H), 6.79-6.86 (dd,  $J_1 = 17.6$  Hz,  $J_2 = 11.2$  Hz, 1H), 6.40-6.45 (m, 2H), 6.02 (s, 1H), 5.66-5.75 (d,  $J = 18.8$  Hz, 1H) ppm.  **$^{13}\text{C}$  NMR (100 MHz,  $\text{CDCl}_3$ )**  $\delta$ : 162.43 (d,  $J = 243$  Hz, 1C), 143.01 (d,  $J = 11$  Hz, 1C), 137.32, 131.17, 132.21, 130.12 (d,

$J = 10$  Hz, 1C), 128.90, 127.00, 125.54, 124.54, 116.69, 114.88, 105.96 (d,  $J = 23$  Hz, 1C), 101.45 (d,  $J = 28$  Hz, 1C) ppm.  **$^{19}\text{F}$  NMR (282 MHz)**  $\delta$ : -63.218. **IR (KBr disc,  $\text{cm}^{-1}$ )**: 3404, 1611, 1507, 1438, 1303, 1164, 768. Anal. Calc. for  $\text{C}_{14}\text{H}_{11}\text{ClFN}$ : C, 67.89; H, 4.48; N. Found: C, 68.00; H, 4.46.

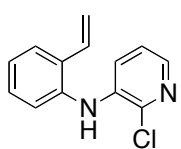

### 2-chloro-*N*-(2-vinylphenyl)pyridin-3-amine

According to *General Procedure 1*, a solution of 1.2 mmol (194.4 mg) of 2-amino-3-chloropyridine, 1.0 mmol (182 mg) of 2-bromostyrene, 0.025 mol (13.5 mg) of BrettPhos, 0.0075 mol% (6.9 mg) of  $\text{Pd}_2(\text{dba})_3$  and 3.0 mmol (288 mg) of NaOtBu in 1 mL of 1,4-dioxane was heated at  $110^\circ\text{C}$  for 4 hours. The crude was purified using Biotage SP4 (100% hexanes) to provide a pure adduct as light yellow oil (209 mg, 91%).  **$^1\text{H}$  NMR (400 MHz,  $\text{CDCl}_3$ )**  $\delta$ : 7.79 (m, 1H), 7.56-7.58 (d,  $J = 8.0$ , 1H), 7.23-7.28 (m, 1H), 7.16-7.20 (m, 2H), 6.97-7.03 (m, 2H), 6.75-6.83 (dd,  $J_1 = 17.6$ ,  $J_2 = 11.2$  Hz, 2H), 5.98 (s, 1H), 5.70-5.74 (d,  $J = 17.2$  Hz, 1H), 5.26-5.29 (d,  $J = 10.4$  Hz, 1H) ppm.  **$^{13}\text{C}$  NMR (100 MHz,  $\text{CDCl}_3$ )**  $\delta$ : 138.74, 138.68, 137.86, 136.89, 133.21, 132.14, 128.93, 127.07, 125.67, 124.27, 123.16, 120.90, 116.86 ppm. **IR (KBr disc,  $\text{cm}^{-1}$ )**: 3393, 1581, 153, 1479, 1451, 1318, 1056, 767. Anal. Calc. for  $\text{C}_{13}\text{H}_{11}\text{ClN}$ : C, 67.68; H, 4.81; N, 12.14. Found: C, 67.62; H, 4.75.

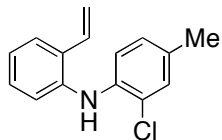

### 2-Chloro-4-methyl-*N*-(2-vinylphenyl)aniline

Following *General Procedure 1*, a solution of 1.2 mmol (169.2 mg) of 2-chloro-4-methylaniline, 1.0 mmol (182 mg) of 2-bromostyrene, 0.025 mol (13.5 mg) of BrettPhos, 0.0075 mmol (6.9 mg) of  $\text{Pd}_2(\text{dba})_3$  and 3.0 mmol (288 mg) of NaOtBu in 1 mL of 1,4-dioxane was heated at  $110^\circ\text{C}$  for 4 hours. The crude was purified using Biotage SP4 (100% hexanes) to provide a pure adduct as colorless oil (240 mg, 99%).  **$^1\text{H}$  NMR (400 MHz,  $\text{CDCl}_3$ )**  $\delta$ : 7.52-7.54 (d,  $J = 7.6$  Hz, 1H), 7.18-7.26 (m, 3H), 7.05-7.11 (m, 1H), 6.84-6.92 (m, 3H), 5.83 (s, 1H), 5.70-5.75 (dd,  $J_1 = 17.6$ ,  $J_2 = 1.6$  Hz, 1H), 5.31-5.33 (dd,  $J_1 = 11.2$ ,  $J_2 = 1.2$  Hz, 1H), 2.26 (s, 3H) ppm.  **$^{13}\text{C}$  NMR (100 MHz,  $\text{CDCl}_3$ )**  $\delta$ : 139.15, 138.59, 132.61, 131.46, 129.95, 128.68, 128.09, 127.05, 123.68, 121.93, 121.18, 116.34, 115.98, 20.38 ppm. **IR (KBr disc,  $\text{cm}^{-1}$ )**: 3406, 1612, 1600, 1513, 1457, 1312, 1049, 995, 914, 810, 761. Anal. Calc. for  $\text{C}_{15}\text{H}_{14}\text{ClN}$ : C, 73.92; H, 5.79. Found: C, 73.99; H, 5.77.

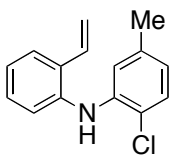

### 2-Chloro-5-methyl-N-(2-vinylphenyl)aniline (Table 2)

Following *General Procedure 1*, a solution of 1.2 mmol (169.2 mg) of 2-chloro-5-methylaniline, 1.0 mmol (182 mg) of 2-bromostyrene, 0.025 mol (13.5 mg) of BrettPhos, 0.0075 mol% (6.9 mg) of  $\text{Pd}_2(\text{dba})_3$  and 3.0 mmol (288 mg) of  $\text{NaOtBu}$  in 1 mL of 1,4-dioxane was heated at  $110^\circ\text{C}$  for 4 hours. The crude was purified using Biotage SP4 (2/98% EtOAc/hexanes mixture) to provide a pure adduct as white powder (177 mg, 73%), mp.  $35\text{--}36^\circ\text{C}$ .  **$^1\text{H}$  NMR (400 MHz,  $\text{CDCl}_3$ )**  $\delta$ : 7.55-7.57 (d,  $J = 8.0$  Hz, 1H), 7.26-7.27 (d,  $J = 3.6$  Hz, 2H), 7.20-7.22 (d,  $J = 8.0$  Hz, 1H), 7.10-7.16 (m, 1H), 6.84-6.91 (dd,  $J_1 = 17.6$ ,  $J_2 = 11.2$  Hz, 1H), 6.71 (s, 1H), 6.56-6.58 (d,  $J = 8.0$  Hz, 1H), 5.91 (s, 1H), 5.70-5.75 (d,  $J = 17.6$  Hz, 1H), 5.30-5.33 (d,  $J = 12$ , 1H), 2.18 (s, 3H) ppm.  **$^{13}\text{C}$  NMR (100 MHz,  $\text{CDCl}_3$ )**  $\delta$ : 140.87, 138.57, 137.54, 132.56, 132.19, 129.18, 128.70, 126.97, 124.26, 123.13, 120.70, 117.87, 116.34, 115.71, 21.35 ppm. **IR (KBr disc,  $\text{cm}^{-1}$ )**: 3341, 1420, 1384, 818, 748. Anal. Calc. for  $\text{C}_{15}\text{H}_{14}\text{ClN}$ : C, 73.92; H, 5.79; N, 5.75. Found: C, 74.09; H, 5.73; N, 5.79.

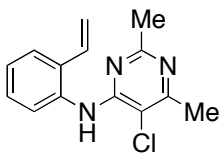

### 4-Amino-5-chloro-2,6-dimethyl-N-(2-vinylphenyl)pyrimidine

According to *General Procedure 1*, a solution of 1.2 mmol (188.8 mg) of 4-amino-5-chloro-2,6-dimethylpyrimidine, 1.0 mmol (182 mg) of 2-bromostyrene, 0.025 mol (13.5 mg) of BrettPhos, 0.0075 mol% (6.9 mg) of  $\text{Pd}_2(\text{dba})_3$  and 3.0 mmol (288 mg) of  $\text{NaOtBu}$  in 1 mL of 1,4-dioxane was heated at  $110^\circ\text{C}$  for 4 hours. The crude was purified using Biotage SP4 (15/85% EtOAc/hexanes mixture) to provide a pure adduct as white solid (142 mg, 55%), mp.  $69\text{--}70^\circ\text{C}$ .  **$^1\text{H}$  NMR (400 MHz,  $\text{CDCl}_3$ )**  $\delta$ : 7.98-8.00 (d,  $J = 10.0$  Hz, 1H), 7.43-7.45 (d,  $J = 10.0$  Hz, 1H), 7.30-7.31 (t,  $J = 5.0$  Hz, 1H), 7.11-7.15 (m, 2H), 6.80-6.85 (dd,  $J_1 = 19.0$  Hz,  $J_2 = 12.0$  Hz, 1H), 5.68-5.72 (d,  $J = 16.0$  Hz, 1H), 5.39-5.41 (d,  $J = 8.0$  Hz, 1H), 2.49 (s, 6H) ppm.  **$^{13}\text{C}$  NMR (100 MHz,  $\text{CDCl}_3$ )**  $\delta$ : 164.46, 161.47, 155.51, 135.12, 132.28, 130.94, 128.30, 127.08, 124.86, 123.43, 118.20, 111.20, 25.66, 22.13 ppm. **IR (KBr disc,  $\text{cm}^{-1}$ )**: 3191, 1564, 1490, 1416, 1057, 769. Anal. Calc. for  $\text{C}_{14}\text{H}_{14}\text{ClN}_3$ : C, 64.74; H, 5.43. Found: C, 64.96; H, 5.59.

## Experimental data for compounds described in Table 1

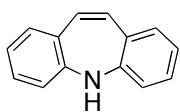

### 5H-Dibenz[b,f]azepine (1)

According to *General Procedure 1A*, a solution of 1.2 mmol (153.6 mg) 2-chloroaniline, 1.0 mmol (182 mg) of 2-bromostyrene, 2.25 mmol (9.8 mg) of DavePhos, 0.0075 mmol (6.9 mg) of  $\text{Pd}_2(\text{dba})_3$  and 3.0 mmol (288 mg) of  $\text{NaOtBu}$  in 1 mL of 1,4-dioxane was heated at 110°C for 6 hours. The crude was purified using Biotage SP4 (100% hexanes) to provide a pure adduct as yellow powder (193 mg, 99%), mp. 197-199 °C (lit.<sup>3b</sup> m.p. 195-196 °C). **<sup>1</sup>H NMR (400 MHz,  $\text{CDCl}_3$ )**  $\delta$ : 6.85-7.7.01 (dd,  $J_1 = 9.2$  Hz,  $J_2 = 2.0$  Hz, 1H), 7.005-7.028 (dd,  $J_1 = 9.2$  Hz,  $J_2 = 2.4$  Hz, 1H), 6.79-6.85 (m, 4H), 6.46-6.48 (d,  $J = 8$  Hz, 2H), 6.30 (s, 2H), 4.82 (s, 1H), ppm. **<sup>13</sup>C NMR (100 MHz,  $\text{CDCl}_3$ )**  $\delta$ : 148.39, 132.16, 130.53, 129.77, 129.49, 123.06, 119.36 ppm. **IR (KBr disc,  $\text{cm}^{-1}$ )**: 3361, 1580, 1434, 933, 756.

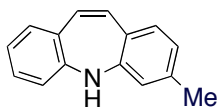

### 3-Methyl-5H-dibenz[b,f]azepine

According to *General Procedure 2A*, a solution of 1.2 mmol (169.2 mg) of 2-chloro-5-methylaniline, 1.0 mmol (182 mg) of 2-bromostyrene, 2.25 mmol (9.8 mg) of DavePhos, 0.0075 mmol (6.9 mg) of  $\text{Pd}_2(\text{dba})_3$  and 3.0 mmol (288 mg) of  $\text{NaOtBu}$  in 1 mL of 1,4-dioxane was heated at 110°C for 6 hours. The crude was purified using Biotage SP4 (2/98% EtOAc/hexanes mixture) to provide a pure adduct as orange crystal needles (188 mg, 91%), mp. 219-221 °C (*lit.*<sup>3b</sup> m.p. 213-215 °C). **<sup>1</sup>H NMR (400 MHz,  $\text{CDCl}_3$ )**  $\delta$ : 6.96-7.01 (dt,  $J_1 = 8.6$  Hz,  $J_2 = 2.0$  Hz, 1H), 6.77-6.83 (m, 2H), 6.71-6.73 (d,  $J = 7.6$  Hz, 1H), 6.60-6.62 (d,  $J = 8.4$  Hz, 1H), 6.44-6.46 (d,  $J = 8.0$  Hz, 1H), 6.30 (s, 1H), 6.21-6.24 (d,  $J = 11.6$  Hz, 1H), 6.25-6.28 (d,  $J = 11.6$  Hz, 1H), 4.85 (s, 1H), 2.17 (s, 3H) ppm. **<sup>13</sup>C NMR (100 MHz,  $\text{CDCl}_3$ )**  $\delta$ : 148.24, 139.71, 132.03, 131.15, 130.49, 130.44, 129.85, 129.30, 126.88, 123.70, 122.96, 120.12, 119.25, 20.89 ppm. **IR (KBr disc,  $\text{cm}^{-1}$ )**: 3345, 1384, 819, 748.

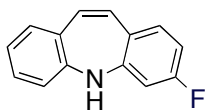

### 3-Fluoro-5H-dibenz[b,f]azepine

According to *General Procedure 2A*, a solution of 1.2 mmol (175.2 mg) of 2-chloro-5-fluoroaniline, 1.0 mmol (182 mg) of 2-bromostyrene, 2.25 mmol (9.8 mg) of DavePhos, 0.0075 mmol (6.9 mg) of  $\text{Pd}_2(\text{dba})_3$  and 3.0 mmol (288 mg) of NaOtBu in 1 mL of 1,4-dioxane was heated at 110°C for 24 hours. The crude was purified using Biotage SP4 (5/95% EtOAc/hexanes mixture) to provide a pure adduct as yellow crystal plates (193 mg, 92%), mp. 186-188 °C.  **$^1\text{H}$  NMR (400 MHz,  $\text{CDCl}_3$ )**  $\delta$ : 6.99-7.02 (m, 1H), 6.81-6.82 (d,  $J$  = 4.0 Hz, 2H), 6.74-6.77 (t,  $J$  = 8.0 Hz, 1H), 6.43-6.50 (m, 2H), 6.02-6.21 (m, 3H), 4.89 (s 1H) ppm.  **$^{13}\text{C}$  NMR (100 MHz,  $\text{CDCl}_3$ )**  $\delta$ : 165.21, 162.74, 150.00-150.09 ( $J$  = 9 Hz, 1C), 147.36, 131.77-131.86 ( $J$  = 9), 131.18, 130.56, 129.64, 129.53, 125.78-125.82 ( $J$  = 4 Hz, 1C), 123.44, 119.40, 109.28-109.49 ( $J$  = 21, 1C), 106.45-106.69 ( $J$  = 24, 1C) ppm.  **$^{19}\text{F}$  NMR (282 MHz,  $\text{CDCl}_3$ )**  $\delta$ : -114.249. **IR (KBr disc,  $\text{cm}^{-1}$ )**: 3365, 1590, 1524, 1423, 1271, 851, 750.

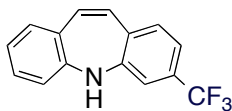

### 3-(Trifluoromethyl)-5H-dibenz[b,f]azepine

According to *General Procedure 1*, a solution of 1.2 mmol (243.4 mg) of 2-chloro-5-(trifluoromethyl)aniline, 1.0 mmol (182 mg) of 2-bromostyrene, 2.25 mmol (9.8 mg) of DavePhos, 0.0075 mmol (6.9 mg) of  $\text{Pd}_2(\text{dba})_3$  and 3.0 mmol (288 mg) of NaOtBu in 1 mL of 1,4-dioxane was heated at 110°C for 24 hours. The crude was purified using Biotage SP4 (5/95% EtOAc/hexanes mixture) to provide a pure adduct as orange plates (232 mg, 89%), mp. 177-179 °C.  **$^1\text{H}$  NMR (400 MHz,  $\text{CDCl}_3$ )**  $\delta$ : 7.02, 7.07 (m, 2H), 6.88-6.90 (d,  $J$  = 7.6 Hz, 1H), 6.81-6.86 (m, 2H), 6.69 (s, 1H), 6.47-6.49 (d,  $J$  = 8.0 Hz, 1H), 6.33-6.36 (d,  $J$  = 12.0 Hz, 1H), 6.24-6.27 (d,  $J$  = 12.0 Hz, 1H), 4.99 (s, 1H) ppm.  **$^{13}\text{C}$  NMR (100 MHz,  $\text{CDCl}_3$ )** Due to the complexity of the spectra all the peaks are listing without take into consideration C-F couplings,  $\delta$ : 148.67, 147.74, 134.26, 133.29, 131.72, 131.39, 131.07, 130.89, 130.82, 130.75, 130.06, 129.33, 125.22, 123.55, 122.52, 119.81, 119.81, 119.77, 119.73, 119.54, 115.93, 115.89, 115.85 ppm.  **$^{19}\text{F}$  NMR (282 MHz,  $\text{CDCl}_3$ )**  $\delta$ : -63.461. **IR (KBr disc,  $\text{cm}^{-1}$ )**: 3333, 1583, 1424, 1335, 1169, 1122, 1078, 844, 757. Anal. Calc. for  $\text{C}_{15}\text{H}_{10}\text{F}_3\text{N}$ : C, 68.96; H, 3.86. Found: C, 68.69; H, 3.81.

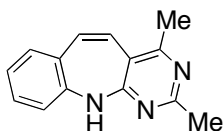

### 2,4-Dimethyl-11H-benzo[b]pyrimido[5,4-f]azepine

According to *General Procedure 2B*, a solution of 1.2 mmol (188.8 mg) of 4-amino-5-chloro-2,6-dimethylpyrimidine, 1.0 mmol (182 mg) of 2-bromostyrene, 8 mol% (31.4 mg) of DavePhos, 2.5 mol% (22.9 mg) of Pd<sub>2</sub>(dba)<sub>3</sub> and 3.0 mmol (288 mg) of NaOtBu in 2 mL of dioxane was heated at 120°C for 24 hours. The crude was purified using Biotage SP4 (25/75% EtOAc/hexanes mixture) to provide a pure adduct as orange crystals (162 mg, 73%), mp. 138-140 °C. **<sup>1</sup>H NMR (400 MHz, CDCl<sub>3</sub>)** δ: 6.93-6.97 (t, *J* = 9.2 Hz, 1H), 6.75-6.78 (t, *J* = 7.6 Hz, 1H), 6.71-6.75 (t, *J* = 6.4 Hz, 1H), 6.33-6.35 (d, *J* = 8.0 Hz, 1H), 6.06-6.09 (d, *J* = 12.0 Hz, 1H), 6.95-6.98 (d, *J* = 12.0 Hz, 1H), 5.85 (s, 1H), 2.35 (s, 3H), 2.21 (s, 3H) ppm. **<sup>13</sup>C NMR (100 MHz, CDCl<sub>3</sub>)** δ: 166.36, 166.28, 164.14, 144.10, 133.01, 131.31, 130.20, 128.14, 125.31, 123.85, 119.65, 115.00, 25.17, 21.90 ppm. **IR (KBr disc, cm<sup>-1</sup>):** 3254, 1580, 1543, 1485, 1422, 1397, 1256, 804, 752.

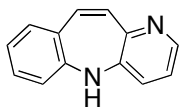

### 11H-Benzo[b]pyrido[3,2-f]azepine

Following *General Procedure 2A*, a solution of 1.2 mmol (194.4 mg) of 3-amino-2-chloropyridine, 1.0 mmol (182 mg) of 2-bromostyrene, 2.25 mmol (9.8 mg) of DavePhos, 0.0075 mmol (6.9 mg) of Pd<sub>2</sub>(dba)<sub>3</sub> and 3.0 mmol (288 mg) of NaOtBu in 1 mL of 1,4-dioxane was heated at 110°C for 24 hours. The crude was purified using Biotage SP4 (100% hexanes) to provide a pure adduct as orange solid (172 mg, 89%), mp. 182-185 °C. **<sup>1</sup>H NMR (400 MHz, CDCl<sub>3</sub>)** δ: 8.02-8.04 (dd, *J*<sub>1</sub> = 4.8 Hz, *J*<sub>2</sub> = 1.6 Hz, 1H), 7.00-7.04 (dt, *J*<sub>1</sub> = 8.6 Hz, *J*<sub>2</sub> = 2.0 Hz, 1H), 6.81-6.92 (m, 3H), 6.71-6.74 (d, *J* = 8.0 Hz, 1H), 6.41-6.48 (m, 3H), 4.75 (s, 1H) ppm. **<sup>13</sup>C NMR (100 MHz, CDCl<sub>3</sub>)** δ: 149.26, 147.88, 144.61, 143.66, 135.03, 133.31, 131.19, 130.04, 129.19, 125.88, 123.58, 123.52, 119.28 ppm. **IR (KBr disc, cm<sup>-1</sup>):** 3266, 1611, 1448, 1437, 1390, 1284, 1110, 802, 762, 749. Anal. Calc. for C<sub>13</sub>H<sub>10</sub>N<sub>2</sub>: C, 80.39; H, 5.19. Found: C, 80.01; H, 5.29.

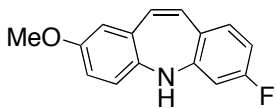

### 7-Fluoro-2-methoxy-5H-dibenzo[b,f]azepine

According to *General Procedure 2A*, a solution of 1.2 mmol (175.2 mg) of 2-chloro-5-fluoroaniline, 1.0 mmol (212 mg) of 2-bromo-4-methoxy-1-vinylbenzene, 2.25 mmol (9.8 mg) of DavePhos, 0.0075 mmol (6.9 mg) of  $\text{Pd}_2(\text{dba})_3$  and 3.0 mmol (288 mg) of  $\text{NaOtBu}$  in 1 mL of 1,4-dioxane was heated at 110°C for 24 hours. The crude was purified using Biotage SP4 (10/90% EtOAc/hexanes mixture) to provide a pure adduct as orange solid (197 mg, 82%), mp. 145-147 °C.  **$^1\text{H}$  NMR (400 MHz,  $\text{CDCl}_3$ )**  $\delta$ : 6.77-6.81 (dd,  $J_1 = 14.8$ ,  $J_2 = 6.4$  Hz, 1H), 6.57-6.60 (dd,  $J_1 = 8.4$ ,  $J_2 = 2.8$ , 1H), 6.45-6.52 (dt,  $J_1 = 8.4$  Hz,  $J_2 = 2.4$ , 1H), 6.42-6.43 (d,  $J = 4.8$  Hz, 1H), 6.41-6.42 (d,  $J = 5.6$  Hz, 1H), 6.22-6.32 (m, 3H), 4.81 (s, 1H), 3.69 (s, 3H), ppm.  **$^{13}\text{C}$  NMR (100 MHz,  $\text{CDCl}_3$ )** Due to the complexity of the spectra all the peaks are listing without take into consideration C-F couplings,  $\delta$ : 165.21, 162.75, 156.04, 150.81, 150.72, 140.44, 131.91, 131.87, 131.81, 130.91, 130.83, 130.81, 125.72, 125.69, 120.36, 115.55, 114.36, 109.38, 109.17, 106.57, 106.33, 55.54. ppm.  **$^{19}\text{F}$  NMR (282 MHz,  $\text{CDCl}_3$ )**  $\delta$ : -114.053. **IR (KBr disc,  $\text{cm}^{-1}$ )**: 3361, 1613, 1519, 1396, 1270, 1220, 1145, 1037, 811. Anal. Calc. for  $\text{C}_{15}\text{H}_{12}\text{FNO}$ : C, 74.67; H, 5.01. Found: C, 74.45; H, 5.04.

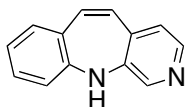

### 11H-Benzo[b]pyrido[4,3-f]azepine

According to *General Procedure 2A*, a solution of 1.2 mmol (194.4 mg) of 3-amino-4-chloropyridine, 1.0 mmol (182 mg) of 2-bromostyrene, 2.25 mmol (9.8 mg) of DavePhos, 0.0075 mmol (6.9 mg) of  $\text{Pd}_2(\text{dba})_3$  and 3.0 mmol (288 mg) of  $\text{NaOtBu}$  in 1 mL of 1,4-dioxane was heated at 110°C for 24 hours. The crude was purified using Biotage SP4 (100% hexanes) to provide a pure adduct as orange solid (187 mg, 97%), mp. 126-127 °C.  **$^1\text{H}$  NMR (400 MHz,  $\text{CDCl}_3$ )**  $\delta$ : 7.97-7.99 (d,  $J = 4.8$  Hz, 1H), 7.75 (s, 1H), 6.99-7.06 (m, 1H), 6.78-6.82 (m, 2H), 6.64-6.66 (d,  $J = 4.8$  Hz, 1H), 6.46-6.48 (d,  $J = 8.0$  Hz, 1H), 6.36-6.39 (d,  $J = 11.6$ , 1H), 6.09-6.12 (d,  $J = 12$ , 1H), 5.07 (s, 1H) ppm.  **$^{13}\text{C}$  NMR (100 MHz,  $\text{CDCl}_3$ )**  $\delta$ : 148.38, 144.75, 144.01, 140.02, 137.00, 136.88, 131.43, 129.57, 128.90, 123.52, 123.38, 123.43, 119.60 ppm. **IR (KBr disc,  $\text{cm}^{-1}$ )**: 3281, 3217, 3029, 1593, 1474, 1307, 1282, 839, 760. Anal. Calc. for  $\text{C}_{14}\text{H}_{10}\text{ClN}$ : C, 73.85; H, 4.43; N, 6.15. Found: C, 73.57; H, 4.56; N, 5.95.

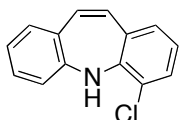

#### 4-Chloro-5H-dibenzo[*b,f*]azepine

According to *General Procedure 2A*, a solution of 1.2 mmol (194.4 mg) of 2,6-dichloroaniline, 1.0 mmol (182 mg) of 2-bromostyrene, 2.25 mmol (9.8 mg) of DavePhos, 0.0075 mmol (6.9 mg) of Pd<sub>2</sub>(dba)<sub>3</sub> and 3.0 mmol (288 mg) of NaOtBu in 1 mL of 1,4-dioxane was heated at 110°C for 24 hours. The crude was purified using Biotage SP4 (100% hexanes) to provide a pure adduct as orange solid (181 mg, 80%), mp. 56-57 °C. <sup>1</sup>H NMR (400 MHz, CDCl<sub>3</sub>) δ: 7.14-7.16 (dd, *J*<sub>1</sub> = 7.2 Hz, *J*<sub>2</sub> = 2.0 Hz, 1H), 7.07-7.12 (m, 1H), 6.86-6.91 (m, 2H), 6.73-6.78 (m, 2H), 6.65-6.67 (d, *J* = 8.0 Hz, 1H), 6.38-6.41 (d, *J* = 11.6 Hz, 1H), 6.31-6.34 (d, *J* = 11.6 Hz, 1H), 5.82 (s, 1H), ppm. <sup>13</sup>C NMR (100 MHz, CDCl<sub>3</sub>) δ: 147.50, 144.24, 132.97, 131.60, 131.52, 130.41, 129.81, 129.76, 129.13, 129.05, 123.58, 123.41, 123.16, 120.61 ppm. IR (KBr disc, cm<sup>-1</sup>): 3353, 3049, 3025, 1610, 1457, 1432, 1263, 1138, 924, 801, 702. Anal. Calc. for C<sub>14</sub>H<sub>10</sub>ClN: C, 73.85; H, 4.43; N, 6.15. Found: C, 73.57; H, 4.56; N, 5.95.

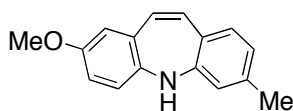

#### 2-Methoxy-7-methyl-5H-dibenzo[*b,f*]azepine

According to *General Procedure 2A*, a solution of 1.2 mmol (169.2 mg) of 2-chloro-5-methylaniline, 1.0 mmol (212 mg) of 2-bromo-4-methoxy-1-vinylbenzene, 2.25 mmol (9.8 mg) of DavePhos, 0.0075 mmol (6.9 mg) of Pd<sub>2</sub>(dba)<sub>3</sub> and 3.0 mmol (288 mg) of NaOtBu in 1 mL of 1,4-dioxane was heated at 110°C for 24 hours. The crude was purified using Biotage SP4 (35/65% EtOAc/hexanes mixture) to provide a pure adduct as yellow crystalline powder (218 mg, 92%), mp. 187-189 °C. <sup>1</sup>H NMR (400 MHz, CDCl<sub>3</sub>) δ: 6.75-6.77 (d, *J* = 8.0 Hz, 1H), 6.62-6.64 (d, *J* = 7.6 Hz, 1H), 6.56-6.59 (dd, *J*<sub>1</sub> = 8.4 Hz, *J*<sub>2</sub> = 2.4 Hz, 1H), 6.42-6.44 (m, 2H), 6.34 (s, 2H), 4.79 (s, 1H), 3.69 (s, 3H), 2.19 (s, 3H) ppm. <sup>13</sup>C NMR (100 MHz, CDCl<sub>3</sub>) δ: 155.76, 148.91, 141.31, 139.75, 132.70, 131.09, 130.73, 130.47, 126.79, 123.59, 120.14, 120.02, 115.36, 114.26, 55.55, 20.93 ppm. IR (KBr disc, cm<sup>-1</sup>): 3357, 1502, 1271, 1037, 860, 839, 807. Anal. Calc. for C<sub>16</sub>H<sub>15</sub>NO: C, 80.98; H, 6.37. Found: C, 80.64; H, 6.43.

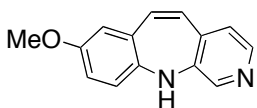

### 8-Methoxy-11H-benzo[b]pyrido[4,3-f]azepine

According to *General Procedure 2A*, a solution of 1.2 mmol (194.4 mg) of 3-amino-4-chloropyridine, 1.0 mmol (212 mg) of 2-bromo-4-methoxy-1-vinylbenzene, 2.25 mmol (9.8 mg) of DavePhos, 0.0075 mmol (6.9 mg) of  $\text{Pd}_2(\text{dba})_3$  and 3.0 mmol (288 mg) of  $\text{NaOtBu}$  in 1 mL of 1,4-dioxane was heated at  $110^\circ\text{C}$  for 24 hours. The crude was purified using Biotage SP4 (60/40% EtOAc/hexanes mixture) to provide a pure adduct as orange viscose oil (175 mg, 94%).  **$^1\text{H}$  NMR (400 MHz,  $\text{CDCl}_3$ )**  $\delta$ : 8.02-8.03 (d,  $J = 4.8$  Hz, 1H), 7.82 (s, 1H), 6.71-6.72 (d,  $J = 4.8$ , 2H), 6.62-6.65 (dd,  $J_1 = 11.2$ ,  $J_2 = 2.8$ , 1H), 6.43-6.49 (m, 3H), 6.23-6.26 (d,  $J = 11.6$  Hz, 1H), 4.91 (s, 1H), 3.71 (s, 3H) ppm.  **$^{13}\text{C}$  NMR (100 MHz,  $\text{CDCl}_3$ )**  $\delta$ : 155.98, 144.58, 141.27, 140.08, 136.68, 136.47, 130.27, 130.12, 123.51, 120.54, 116.43, 115.21, 55.58 ppm. **IR (KBr disc,  $\text{cm}^{-1}$ )**: 3278, 3208, 1584, 1504, 1477, 1400, 1271, 1241, 1041, 840.

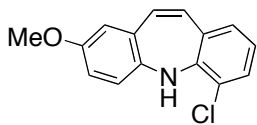

### 6-Chloro-2-methoxy-5H-dibenzo[b,f]azepine

According to *General Procedure 2A*, a solution of 1.2 mmol (194.4 mg) of 2,6-dichloroaniline, 1.0 mmol (212 mg) of 2-bromo-4-methoxy-1-vinylbenzene, 2.25 mmol (9.8 mg) of DavePhos, 0.0075 mmol (6.9 mg) of  $\text{Pd}_2(\text{dba})_3$  and 3.0 mmol (288 mg) of  $\text{NaOtBu}$  in 1 mL of 1,4-dioxane was heated at  $110^\circ\text{C}$  for 24 hours. The crude was purified using Biotage SP4 (10/90% EtOAc/hexanes mixture) to provide a pure adduct as yellow twinkle powder (226 mg, 88%), mp.  $98-100^\circ\text{C}$ .  **$^1\text{H}$  NMR (400 MHz,  $\text{CDCl}_3$ )**  $\delta$ : 7.13-7.16 (d,  $J = 12.0$  Hz, 1H), 6.72-6.80 (m, 2H), 6.60-6.66 (m, 2H), 6.46-6.48 (d,  $J = 2.4$  Hz, 1H), 6.39 (s, 2H), 5.70 (s, 1H) ppm.  **$^{13}\text{C}$  NMR (100 MHz,  $\text{CDCl}_3$ )**  $\delta$ : 156.12, 144.86, 140.46, 132.54, 132.18, 131.36, 130.98, 129.09, 129.02, 123.38, 122.97, 121.49, 115.32, 114.67 ppm. **IR (KBr disc,  $\text{cm}^{-1}$ )**: 3359, 1455, 1418, 1384, 1255, 1038, 796, 711. Anal. Calc. for  $\text{C}_{15}\text{H}_{12}\text{ClNO}$ : C, 69.91; H, 4.69; Cl, 13.76. Found: C, 69.78; H, 4.59.

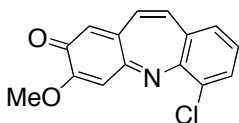

### 6-chloro-3-methoxy-2H-dibenzo[*b,f*]azepin-2-one

According to *General Procedure 2B*, a solution of 1.2 mmol (194.4 mg) of 2,6-dichloroaniline, 1.0 mmol (228 mg) of 4-bromo-2-methoxy-5-vinylphenol, 2.25 mmol (9.8 mg) of DavePhos, 0.0075 mmol (6.9 mg) of Pd<sub>2</sub>(dba)<sub>3</sub> and 3.0 mmol (288 mg) of NaOtBu in 1 mL of 1,4-dioxane was heated at 120°C for 24 hours. The crude was purified using Biotage SP4 (60/40% EtOAc/hexanes mixture) to provide a pure adduct as red powder (177 mg, 65%), mp. 157-159 °C. **<sup>1</sup>H NMR (400 MHz, CDCl<sub>3</sub>)** δ: 7.74-7.79 (dd, *J*<sub>1</sub> = 6.4 Hz, *J*<sub>2</sub> = 2.8 Hz, 1H), 7.40-7.7.45 (m, 2H), 7.05-7.08 (d, *J* = 12 Hz, 1H), 7.00 (s, 1H), 6.92-6.95 (d, *J* = 12 Hz, 1H), 6.72(s, 1H), 4.00 (s, 3H), ppm. **<sup>13</sup>C NMR (100 MHz, CDCl<sub>3</sub>)** δ: 180.01, 157.91, 154.54, 142.05, 140.01, 138.11, 135.96, 133.38, 132.16, 131.70, 131.16, 130.76, 126.46, 115.16, 56.34. **IR (KBr disc, cm<sup>-1</sup>):** 2964, 2920, 2848, 1629, 1609, 1589, 1468, 1237, 1209, 1162, 882. **Anal.** Calc. for C<sub>15</sub>H<sub>10</sub>ClNO<sub>2</sub>: C, 66.31; H, 3.71. Found: C, 65.96; H, 3.82.

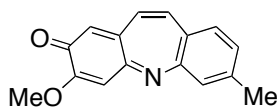

### 6-chloro-3-methoxy-2H-dibenzo[*b,f*]azepin-2-one

According to *General Procedure 2B*, a solution of 1.2 mmol (169.2 mg) of 2-chloro-5-methylaniline, 1.0 mmol (228 mg) of 4-bromo-2-methoxy-5-vinylphenol, 2.25 mmol (9.8 mg) of DavePhos, 0.0075 mmol (6.9 mg) of Pd<sub>2</sub>(dba)<sub>3</sub> and 3.0 mmol (288 mg) of NaOtBu in 1 mL of 1,4-dioxane was heated at 120°C for 24 hours. The crude was purified using Biotage SP4 (30/70% EtOAc/hexanes mixture) to provide a pure adduct as red powder (210 mg, 83%), mp. 141-143 °C. **<sup>1</sup>H NMR (400 MHz, CDCl<sub>3</sub>)** δ: 7.79 (s, 1H), 7.45-7.47 (d, *J* = 8 Hz, 1H), 7.34-7.36 (dd, *J*<sub>1</sub> = 9.6 Hz, *J*<sub>2</sub> = 1.6 Hz, 1H), 7.08-7.11 (d, *J* = 12 Hz, 1H), 6.91 (s, 1H), 6.89-6.91 (d, *J* = 10.4 Hz, 1H), 6.70 (s, 1H), 3.96 (s, 3H), 2.2.49 (s, 3H) ppm. **<sup>13</sup>C NMR (100 MHz, CDCl<sub>3</sub>)** δ: 179.83, 157.60, 154.48, 146.26, 141.42, 138.91, 136.59, 136.36, 132.22, 131.98, 130.77, 129.45, 125.69, 115.81, 56.13, 21.24 ppm. **IR (KBr disc, cm<sup>-1</sup>):** 3402, 2361, 2338, 1591, 1496, 1457, 1315, 1049, 1034, 743.

## Experimental data for acridines described in Table 3

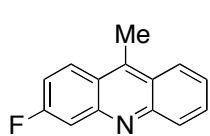

### 3-Fluoro-9-methylacridine

According to *General Procedure 5*, a solution of 0.10 mmol (29 mg) of tri-*tert*-butylphosphonium tetrafluoroborate, 0.025 mmol (22.9 mg) of  $\text{Pd}_2(\text{dba})_3$ , 1.5 mmol (144 mg) of NaOtBu and 1.0 mmol (247 mg) of 2-chloro-5-fluoro-*N*-(2-vinylphenyl)aniline (Table 1) in 1 mL of dry toluene was heated at 100°C for 24 hours. The crude was purified using Biotage SP4 (15/85% diethyl ether/hexanes mixture) to provide a pure adduct as yellow solid (165 mg, 78%), m.p 132-133 °C.  **$^1\text{H}$  NMR (400 MHz,  $\text{CDCl}_3$ )**  $\delta$ : 8.16-8.19 (m, 2H), 8.12-8.14 (d,  $J = 8.4$  Hz, 1H), 7.17-7.76 (m, 2H), 7.48-7.52 (t,  $J = 6.4$  Hz, 1H), 7.30-7.33 (dt,  $J_1 = 8.0$  Hz,  $J_2 = 2.8$  Hz, 1H), 3.05 (s, 3H) ppm.  **$^{13}\text{C}$  NMR (100 MHz,  $\text{CDCl}_3$ )** Due to the complexity of the spectra all the peaks are listing without take into consideration C-F couplings,  $\delta$ : 164.46, 161.95, 149.30, 149.17, 149.08, 142.87, 130.32, 129.88, 127.21, 125.37, 125.05, 124.62, 122.91, 117.35, 117.08, 112.26, 112.07, 13.89 ppm.  **$^{19}\text{F}$  NMR (282 MHz)**  $\delta$ : -109.15. **IR (KBr disc,  $\text{cm}^{-1}$ )**: 1618, 1569, 1528, 1459, 1439, 1274, 1154, 977, 850, 746. Anal. Calc. for  $\text{C}_{14}\text{H}_{10}\text{FN}$ : C, 79.60; H, 4.77. Found: C, 79.44; H, 5.01.

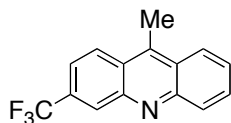

### 9-Methy-3-(trifluoromethyl)acridine

According to *General Procedure 5*, a solution of 0.10 mmol (29 mg) of tri-*tert*-butylphosphonium tetrafluoroborate, 0.025 mmol (22.9 mg) of  $\text{Pd}_2(\text{dba})_3$ , 1.5 mmol (144 mg) of NaOtBu and 1.0 mmol (261 mg) of 2-chloro-5-(trifluoromethyl)-*N*-(2-vinylphenyl)aniline (Table 1) in 1 mL of dry toluene was heated at 100°C for 24 hours. The crude was purified using Biotage SP4 (15/85% diethyl ether/hexanes mixture) to provide a pure adduct as light yellow needles (208 mg, 80%), m.p 117-119 °C.  **$^1\text{H}$  NMR (400 MHz,  $\text{CDCl}_3$ )**  $\delta$ : 8.44 (s, 1H), 8.18-8.20 (d,  $J = 9.2$  Hz, 1H), 8.11-8.13 (d,  $J = 8.8$  Hz, 1H), 8.10-8.13 (d,  $J = 8.8$  Hz, 1H), 7.71-7.75 (t,  $J = 6.4$  Hz, 1H), 7.54-7.57 (d,  $J = 9.2$  Hz, 1H), 7.50-7.57 (t,  $J = 6.4$  Hz, 1H), 2.98 (s, 3H) ppm.  **$^{13}\text{C}$  NMR (100 MHz,  $\text{CDCl}_3$ )** Due to the complexity of the spectra all the peaks are listing without take into consideration C-F couplings,  $\delta$ : 149.04, 146.76, 142.59, 131.53, 131.20, 130.88, 130.48, 130.33, 128.36, 128.31, 128.27, 128.22, 128.06, 126.46, 126.10, 126.06,

126.02, 125.35, 124.48, 122.64, 120.34, 120.31, 119.93, 13.64 ppm. **<sup>19</sup>F NMR (282 MHz)**  $\delta$ : -63.65. **IR (KBr disc, cm<sup>-1</sup>)**: 1557, 1521, 1421, 1349, 1319, 1270, 1238, 1157, 1114, 943, 898, 811, 755, 665. Anal. Calc. for C<sub>15</sub>H<sub>10</sub>F<sub>3</sub>N: C, 68.96; H, 3.86. Found: C, 68.80; H, 3.76.

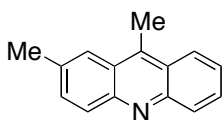

### 2,9-Dimethylacridine (Table 3)

According to *General Procedure 5*, a solution of 0.10 mmol (29 mg) of tri-*tert*-butylphosphonium tetrafluoroborate, 0.025 mmol (22.9 mg) of Pd<sub>2</sub>(dba)<sub>3</sub>, 1.5 mmol (144 mg) of NaOtBu and 1.0 mmol (243 mg) of 2-chloro-4-methyl-*N*-(2-vinylphenyl)aniline (Table 1) in 1 mL of dry toluene was heated at 100°C for 24 hours. The crude was purified using Biotage SP4 (40/60% diethyl diethylether/hexanes mixture) to provide a pure adduct as light yellow solid (203 mg, 98%), m.p 89-90 °C. **<sup>1</sup>H NMR (400 MHz, CDCl<sub>3</sub>)**  $\delta$ : 8.14-8.16 (d, *J* = 8.8 Hz, 1H), 8.11-8.13 (d, *J* = 8.8 Hz, 1H), 8.05-8.08 (d, *J* = 8.8 Hz, 1H), 7.86 (s, 1H), 7.66-7.69 (t, *J* = 8.2 Hz, 1H), 7.52-7.55 (d, *J* = 9.2 Hz, 1H), 7.44-7.48 (t, *J* = 7.8 Hz 1H), 2.96 (s, 3H), 2.53 (s, 3H) ppm. **<sup>13</sup>C NMR (100 MHz, CDCl<sub>3</sub>)**  $\delta$ : 147.88, 147.29, 140.91, 135.02, 130.16, 129.86, 29.22, 125.58, 122.46, 125.22, 124.44, 122.75, 22.22, 13.48 ppm. **IR (KBr disc, cm<sup>-1</sup>)**: 1718, 1635, 1560, 1516, 1447, 1416, 1148, 819, 752. Anal. Calc. for C<sub>15</sub>H<sub>13</sub>N: C, 86.92; H, 6.32. Found: C, 86.54; H, 6.27.

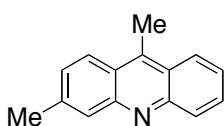

### 3,9-Dimethylacridine

According to *General Procedure 5*, a solution of 0.10 mmol (29 mg) of tri-*tert*-butylphosphonium tetrafluoroborate, 0.025 mmol (22.9 mg) of Pd<sub>2</sub>(dba)<sub>3</sub>, 1.5 mmol (144 mg) of NaOtBu and 1.0 mmol (243 mg) of 2-chloro-5-methyl-*N*-(2-vinylphenyl)aniline (Table 1) in 1 mL of dry toluene was heated at 100°C for 24 hours. The crude was purified using Biotage SP4 (25/75% diethyl ether/hexanes mixture) to provide a pure adduct as light yellow solid (186 mg, 90%), m.p 81-83°C. **<sup>1</sup>H NMR (400 MHz, CDCl<sub>3</sub>)**  $\delta$ : 8.12-8.14 (d, *J* = 8.8 Hz, 1H), 8.04-8.06 (d, *J* = 8.4 Hz, 1H), 7.93-7.95 (d, *J* = 9.2 Hz, 1H), 7.90 (s, 1H), 7.64-7.67 (t, *J* = 8.0 Hz, 1H), 7.38-7.42 (t, *J* = 6.4 Hz, 1H), 7.21-7.24 (d, *J* = 9.2 Hz 1H), 2.90 (s, 3H), 2.51 (s, 3H) ppm. **<sup>13</sup>C NMR (100 MHz, CDCl<sub>3</sub>)**  $\delta$ : 148.51, 148.23, 141.89, 139.95, 129.86, 129.51, 128.25, 128.03,

125.07, 124.81, 124.45, 124.09, 123.73, 21.89, 13.42 ppm. **IR (KBr disc, cm<sup>-1</sup>):** 1636, 1616, 1561, 1515, 1442, 1384, 1017, 878, 805, 752, 647, 602. Anal. Calc. for C<sub>15</sub>H<sub>13</sub>N: C, 86.92; H, 6.32. Found: C, 86.87; H, 6.38.

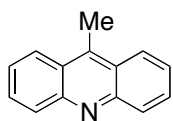

### 9-Methylacridine

According to *General Procedure 5*, a solution of 0.10 mmol (29 mg) of Pd<sub>2</sub>(dba)<sub>3</sub>, 1.5 mmol (144 mg) of NaOtBu and 1.0 mmol (229 mg) of 2-chloro-*N*-(2-vinylphenyl)aniline (Table 1) in 1 mL of dry toluene was heated at 100°C for 24 hours. The crude was purified using Biotage SP4 (25/75% diethyl ether/hexanes mixture) to provide a pure adduct as yellow solid (168 mg, 77%), m.p 114-116 °C (lit.<sup>5</sup> m.p. 117-119 °C) **<sup>1</sup>H NMR (400 MHz, CDCl<sub>3</sub>)** δ: 8.14-8.18 (t, *J* = 8.0 Hz, 4H), 7.68-7.72 (t, *J* = 8.0 Hz, 2H), 7.74-7.50 (t, *J* = 6.8 Hz, 2H), 3.2 (s, 3H) ppm. **<sup>13</sup>C NMR (100 MHz, CDCl<sub>3</sub>)** δ: 148.39, 142.26, 130.19, 129.75, 125.50, 125.37, 124.54, 13.61 ppm.

## Experimental data for vinylcarbazoles described in Table 3

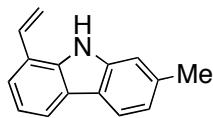

### 7-Methyl-1-vinyl-9H-carbazole

According to *General Procedure 3*, a solution of 1.0 mmol (243 mg) of 2-chloro-5-methyl-*N*-(2-vinylphenyl)aniline (Table 1), 0.06 mmol (23.9 mg) of racemic-2-di-*t*-butylphosphino-1,1'-binaphthyl, 0.03 mmol (6.7 mg) of Pd(OAc)<sub>2</sub>, 1.5 mmol (144 mg) of NaOtBu in 1 mL of 1,4-dioxane was heated at 110°C for 24 hours. The crude was purified using Biotage SP4 (5/95% diethyl ether/hexanes mixture) to provide a pure adduct as white solid (178 mg, 86%), mp. 182-184 °C. **<sup>1</sup>H NMR (400 MHz, CDCl<sub>3</sub>)** δ: 8.14 (s, 1H), 7.93-7.95 (d, *J* = 7.6 Hz, 1H), 7.91-7.93 (d, *J* = 8.0 Hz, 1H), 7.41-7.43 (d, *J* = 7.2 Hz, 1H), 7.17-7.21 (t, *J* = 7.6 Hz, 1H), 7.00-7.07- (m, 2H), 5.83-5.87 (d, *J* = 17.6 Hz, 1H), 5.46-5.49 (d, *J* = 11.2 Hz, 1H) ppm. **<sup>13</sup>C NMR (100 MHz, CDCl<sub>3</sub>)** δ: 140.02, 137.25, 136.22, 133.27, 124.08, 123.33, 121.31, 121.16, 121.01, 120.07, 119.59, 119.57, 115.38, 110.96, 22.11 ppm. **IR (KBr disc, cm<sup>-1</sup>):** 3412, 1412, 1334, 990, 905, 821, 794, 742, 561. Anal. Calc. for C<sub>15</sub>H<sub>13</sub>N: C, 86.92; H, 6.32. Found: C, 86.65; H, 6.30.

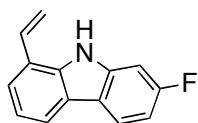

### 7-Fluoro-1-vinyl-9H-carbazole

According to *General Procedure 3*, a solution of 1.0 mmol (247 mg) of 2-chloro-5-fluoro-*N*-(2-vinylphenyl)aniline (Table 1), 0.06 mmol (23.9 mg) of racemic-2-di-*t*-butylphosphino-1,1'-binaphthyl, 0.03 mmol (6.7 mg) of Pd(OAc)<sub>2</sub>, 1.5 mmol (144 mg) of NaOtBu in 1 mL of 1,4-dioxane was heated at 110°C for 24 hours. The crude was purified using Biotage SP4 (5/95% EtOAc/hexanes mixture) to provide a pure adduct as white powder (162 mg, 78%), mp. 98-100 °C. **<sup>1</sup>H NMR (400 MHz, CDCl<sub>3</sub>)** δ: 8.26 (s, 1H), 7.94-7.98 (dd, *J*<sub>1</sub> = 8.8 Hz, *J*<sub>2</sub> = 5.6, 1H), 7.91-7.93 (d, *J* = 7.6 Hz, 1H), 7.43-7.45 (d, *J* = 7.2 Hz, 1H), 7.20-7.24 (t, *J* = 7.6 Hz, 1H), 7.11-7.14 (d, *J* = 9.6 Hz, 1H), 6.99-7.06 (dd, *J*<sub>1</sub> = 17.6 Hz, *J*<sub>2</sub> = 11.2 Hz, 1H), 6.93-6.98 (dt, *J*<sub>1</sub> = 10.8 Hz, *J*<sub>2</sub> = 2.0 Hz, 1H), 5.83-5.88 (d, *J* = 17.6 Hz, 1H), 5.49-5.51 (d, *J* = 11.2 Hz, 1H) ppm. **<sup>13</sup>C NMR (100 MHz, CDCl<sub>3</sub>)** Due to the complexity of the spectra all the peaks are listing without take into consideration C-F couplings, δ: 163.25, 160.85, 140.09, 139.96, 137.63, 133.21, 132.95, 126.02, 123.89, 123.53, 123.49, 121.38, 121.28, 121.19, 120.42, 120.15, 119.89, 119.76, 119.69, 119.45, 115.86, 115.57, 110.81, 108.11, 107.87, 97.75, 97.49 ppm. **<sup>19</sup>F NMR (282 MHz, CDCl<sub>3</sub>)** δ: -115.66. **IR (KBr disc, cm<sup>-1</sup>):** 3437, 1625, 1599, 1497, 1413, 1339, 1139, 1116, 848, 797. Anal. Calc. for C<sub>14</sub>H<sub>10</sub>FN: C, 80.60; H, 4.77. Found: C, 80.33; H, 4.87.

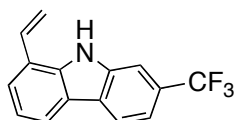

### 7-(Trifluoromethyl)-1-vinyl-9H-carbazole

According to *General Procedure 3*, a solution of 1.0 mmol (247 mg) of 2-chloro-5-fluoro-*N*-(2-vinylphenyl)aniline (Table 1), 0.06 mmol (23.9 mg) of racemic-2-di-*t*-butylphosphino-1,1'-binaphthyl, 0.03 mmol (6.7 mg) of Pd(OAc)<sub>2</sub>, 1.5 mmol (144 mg) of NaOtBu in 1 mL of 1,4-dioxane was heated at 110°C for 24 hours. The crude was purified using Biotage SP4 (5/95% EtOAc/hexanes mixture) to provide a pure adduct as white powder (232 mg, 89%), mp. 93-94 °C. **<sup>1</sup>H NMR (400 MHz, CDCl<sub>3</sub>)** δ: 8.42 (s, 1H), 8.11-8.13 (d, *J* = 8.4 Hz, 1H), 8.00-8.02 (d, *J* = 7.6 Hz, 1H), 7.72 (s, 1H), 7.51-7.52 (d, *J* = 7.2 Hz, 1H), 7.46-7.48 (d, *J* = 8.4 Hz, 1H), 7.24-7.28 (m, 1H), 7.00-7.07 (dd, *J*<sub>1</sub> = 17.6 Hz, *J*<sub>2</sub> = 11.2 Hz, 1H), 5.85-5.89 (d, *J* = 17.6 Hz, 1H), 5.51-5.54 (d, *J* = 11.2 Hz, 1H) ppm. **<sup>13</sup>C NMR (100 MHz, CDCl<sub>3</sub>)** Due to the complexity of the spectra all the peaks are listing without take into consideration C-F couplings, δ:

138.56, 138.14, 132.80, 127.96, 127.64, 126.03, 125.06, 122.98, 121.58, 120.70, 120.39, 120.36, 116.51, 116.48, 116.22, 108.16, 118.11, 29.73 ppm. **<sup>19</sup>F NMR (282 MHz, CDCl<sub>3</sub>)**  $\delta$ : -61.41. **IR (KBr disc, cm<sup>-1</sup>)**: 3415, 2919, 2854, 2355, 2330, 1503, 1331, 1244, 1164, 1108, 1054, 801, 755.

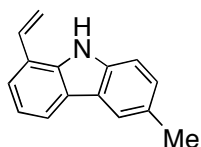

#### 6-Methyl-1-vinyl-9H-carbazole

According to *General Procedure 3*, a solution of 1.0 mmol (243 mg) of 2-chloro-4-methyl-*N*-(2-vinylphenyl)aniline (Table 1), 0.06 mmol (23.9 mg) of racemic-2-di-*t*-butylphosphino-1,1'-binaphthyl, 0.03 mmol (6.7 mg) of Pd(OAc)<sub>2</sub>, 1.5 mmol (144 mg) of NaOtBu in 1 mL of 1,4-dioxane was heated at 110°C for 24 hours. The crude was purified using Biotage SP4 (5/95% diethyl ether/hexanes mixture) to provide a pure adduct as white solid (188 mg, 91%), mp. 129-130 °C. **<sup>1</sup>H NMR (400 MHz, CDCl<sub>3</sub>)**  $\delta$ : 8.13 (s, 1H), 7.97-7.99 (d, *J* = 8.0 Hz, 1H), 7.88 (s, 1H), 7.46-7.48 (d, *J* = 8.4 Hz, 1H), 7.34-7.36 (d, *J* = 8.0 Hz, 1H), 7.21-7.27 (m, 1H), 7.00-7.07 (dd, *J*<sub>1</sub> = 17.6 Hz, *J*<sub>2</sub> = 11.2 Hz, 1H), 5.85-5.90 (d, *J* = 17.6 Hz, 1H), 5.48-5.51 (d, *J* = 10.8 Hz, 1H), 2.55 (s, 3H) ppm. **<sup>13</sup>C NMR (100 MHz, CDCl<sub>3</sub>)**  $\delta$ : 137.79, 137.62, 133.30, 129.09, 127.39, 123.89, 123.74, 123.64, 121.08, 120.36, 119.83, 119.49, 115.39, 110.50, 21.52 ppm. **IR (KBr disc, cm<sup>-1</sup>)**: 3420, 1455, 1410, 1334, 985, 895, 801, 752. Anal. Calc. for C<sub>15</sub>H<sub>13</sub>N: C, 86.92; H, 6.32. Found: C, 86.66; H, 6.50.

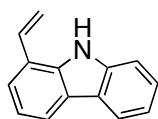

#### 1-Vinyl-9H-carbazole

According to *General Procedure 3*, a solution of 1.0 mmol (229 mg) of 2-chloro-*N*-(2-vinylphenyl)aniline (**7**), 0.06 mmol (23.9 mg) of racemic-2-di-*t*-butylphosphino-1,1'-binaphthyl, 0.03 mmol (6.7 mg) of Pd(OAc)<sub>2</sub>, 1.5 mmol (144 mg) of NaOtBu in 1 mL of 1,4-dioxane was heated at 110°C for 24 hours. The crude was purified using Biotage SP4 (2/98% EtOAc/hexanes mixture) to provide a pure adduct as white solid (181 mg, 94%), mp. 82-83 °C. **<sup>1</sup>H NMR (400 MHz, CDCl<sub>3</sub>)**  $\delta$ : 8.23 (s, 1H), 8.06-8.08 (d, *J* = 7.6 Hz, 1H), 7.99-8.01 (d, *J* = 7.6 Hz, 1H), 7.40-7.48 (m, 3H), 7.18-7.27 (m, 2H), 6.99-7.08 (dd, *J*<sub>1</sub> = 18.00 Hz, *J*<sub>2</sub> = 11.2 Hz, 1H), 5.85-5.89 (d, *J* = 17.6 Hz, 1H), 5.48-5.51 (d, *J* = 10.8 Hz, 1H) ppm. **<sup>13</sup>C NMR (100 MHz, CDCl<sub>3</sub>)**  $\delta$ : 139.53, 137.26, 133.22, 126.03, 123.97, 123.89, 123.46, 121.13, 120.44, 119.90, 119.77, 119.71, 115.57,

110.82 ppm. **IR (KBr disc,  $\text{cm}^{-1}$ ):** 3415, 1619, 1596, 1457, 1414, 1339, 1324, 1228, 984, 908, 753. Anal. Calc. for  $\text{C}_{14}\text{H}_{11}\text{N}$ : C, 87.01; H, 5.74. Found: C, 86.61; H, 5.70.

#### Experimental data for compounds described in Table 4

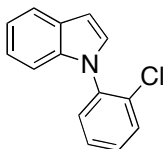

##### 1-(2-Chlorophenyl)-1H-indole (Table 4)

According to *General Procedure 4*, a solution of 1.0 mmol (229 mg) of 2-chloro-*N*-(2-vinylphenyl)aniline (Table 1), 0.10 mmol (22.4 mg) of  $\text{Pd}(\text{OAc})_2$ , 1.5 mmol (272.5 mg) of  $\text{Cu}(\text{OAc})_2$  in 1 mL of acetic acid and 3 mL of DMF was heated at  $110^\circ\text{C}$  for 12 hours. The crude was purified using Biotage SP4 (5/95% EtOAc/hexanes mixture) to provide a pure adduct as light yellow oil (222 mg, 98%).  **$^1\text{H}$  NMR (400 MHz,  $\text{CDCl}_3$ )**  $\delta$ : 7.67-7.69 (dd,  $J_1 = 6.4$  Hz,  $J_2 = 1.6$  Hz, 1H), 7.56-7.59 (m, 1H), 7.35-7.46 (m, 3H), 7.24-7.25 (d,  $J = 3.2$  Hz, 1H), 7.12-7.21 (m, 3H), 6.69-6.70 (d,  $J = 3.2$  Hz, 1H) ppm.  **$^{13}\text{C}$  NMR (100 MHz,  $\text{CDCl}_3$ )**  $\delta$ : 136.92, 136.77, 131.85, 130.85, 129.45, 129.09, 128.79, 128.49, 127.69, 122.32, 121.00, 120.35, 110.62, 103.28 ppm. **IR (KBr disc,  $\text{cm}^{-1}$ ):** 3072, 1588, 1514, 1489, 1455, 1331, 1308, 1232, 1212, 739. Anal. Calc. for  $\text{C}_{14}\text{H}_{10}\text{ClN}$ : C, 73.85; H, 4.43. Found: C, 74.06; H, 4.50.

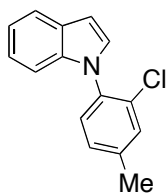

##### 1-(5-Chloro-4-methylphenyl)-1H-indole

According to *General Procedure 4*, a solution of 1.0 mmol (259 mg) of 2-chloro-4-methyl-*N*-(2-vinylphenyl)aniline (Table 1), 0.10 mmol (22.4 mg) of  $\text{Pd}(\text{OAc})_2$ , 1.5 mmol (272.5 mg) of  $\text{Cu}(\text{OAc})_2$  in 1 mL of acetic acid and 3 mL of DMF was heated at  $110^\circ\text{C}$  for 12 hours. The crude was purified using Biotage SP4 (15/85% dichloromethane/hexanes mixture) to provide a pure adduct as yellow oil (210 mg, 87%).  **$^1\text{H}$  NMR (400 MHz,  $\text{CDCl}_3$ )**  $\delta$ : 7.65-7.68 (dd,  $J_1 = 6.8$  Hz,  $J_2 = 1.6$  Hz, 1H), 7.38-7.39 (d,  $J = 1.2$  Hz, 1H), 7.27-7.30 (d,  $J = 13.2$  Hz, 1H), 7.09-7.20 (m, 5H), 7.66-7.67 (d,  $J = 3.2$  Hz, 1H), 2.42 (s, 3H) ppm.  **$^{13}\text{C}$  NMR (100 MHz,  $\text{CDCl}_3$ )**  $\delta$ : 139.54, 136.88, 134.22, 131.47, 131.12, 129.08, 128.89, 128.39, 122.19, 120.93, 120.20, 110.60, 103.00, 21.00 ppm. **IR (KBr disc,  $\text{cm}^{-1}$ ):** 3052, 2922, 1515, 1504, 1457, 1332, 1235, 1212, 1135, 1052, 740. Anal. Calc. for  $\text{C}_{15}\text{H}_{12}\text{ClN}$ : C, 74.53; H, 5.00. Found: C, 74.93; H, 5.40.

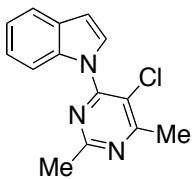

#### 1-(5-Chloro-2,6-dimethylpyrimidine-4-yl)-1H-indole (Table 4)

According to *General Procedure 4*, a solution of 1.0 mmol (259 mg) of 2-chloro-2,6-dimethyl-*N*-(2-vinylphenyl)pyrimidin-4-amine (Table 1), 0.10 mmol (22.4 mg) of Pd(OAc)<sub>2</sub>, 1.5 mmol (272.5 mg) of Cu(OAc)<sub>2</sub> in 1 mL of acetic acid and 3 mL of DMF was heated at 110°C for 12 hours. The crude was purified using Biotage SP4 (50/50% dichloromethane/hexanes mixture) to provide a pure adduct as yellow oil (234 mg, 91%). **<sup>1</sup>H NMR (400 MHz, CDCl<sub>3</sub>)** δ: 7.74-7.76 (d, *J* = 8.4 Hz, 1H), 7.63-7.64 (d, *J* = 3.6 Hz, 1H), 7.61-7.63 (d, *J* = 8.4 Hz, 1H), 7.18-7.28 (m, 2H), 7.69-7.70 (d, *J* = 3.6 Hz, 1H), 2.70 (s, 1H), 2.68 (s, 1H) ppm. **<sup>13</sup>C NMR (100 MHz, CDCl<sub>3</sub>)** δ: 167.94, 165.18, 154.45, 135.66, 129.67, 127.21, 123.30, 121.97, 121.07, 118.86, 113.50, 25.34, 23.26 ppm. **IR (KBr disc, cm<sup>-1</sup>):** 2918, 2850, 1550, 1523, 1454, 1399, 1366, 1123, 1063, 741.

#### References:

1. Inoue, M.; Nakada, M. *J. Am. Chem. Soc.*, **2007**, *129*, 4164
2. Fors, B. P.; Watson, D. A.; Biscoe, M. R.; Buchwald. S. L. *J. Am. Chem. Soc.* **2008**, *130*, 13552.
3. (a) Kricka, L. J.; Ledwith, A. *Chem. Rev.* **1974**, *74*, 101; and references therein.  
(b) Tokmakov, G. P.; Grandberg, I. I. *Tetrahedron*, **1995**, *51*, 2091.
4. Morrow, G. W.; Marks, T. M.; Sear D. L. *Tetrahedron*, **1995**, *51*, 10115.
5. Rogness, D. C.; Larock, R. C. *J. Org. Chem.* **2010**, *75*, 2289.

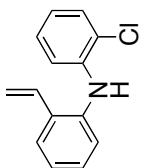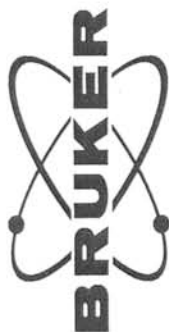

Current Data Parameters  
NAME inter-1  
EXPNO 1  
PROCNO 1

F2 - Acquisition Parameters  
Date\_ 20100410  
Time 10.06  
INSTRUM spect  
PROBHD 5 mm QNP 1H/13  
PULPROG zg30  
TD 65536  
SOLVENT CDCl3  
NS 8  
DS 2  
SWH 8278.146 Hz  
FIDRES 0.126314 Hz  
AQ 3.9584243 sec  
RG 228.1  
DW 60.400 usec  
DE 6.00 usec  
TE 300.0 K  
D1 1.00000000 sec  
TD0 1

===== CHANNEL f1 =====  
NUC1 1H  
P1 14.00 usec  
PL1 0.00 dB  
SFO1 400.1324710 MHz

F2 - Processing parameters  
SI 65536  
SF 400.1300174 MHz  
WDW EM  
SSB 0  
LB 0.30 Hz  
GB 0  
PC 1.00

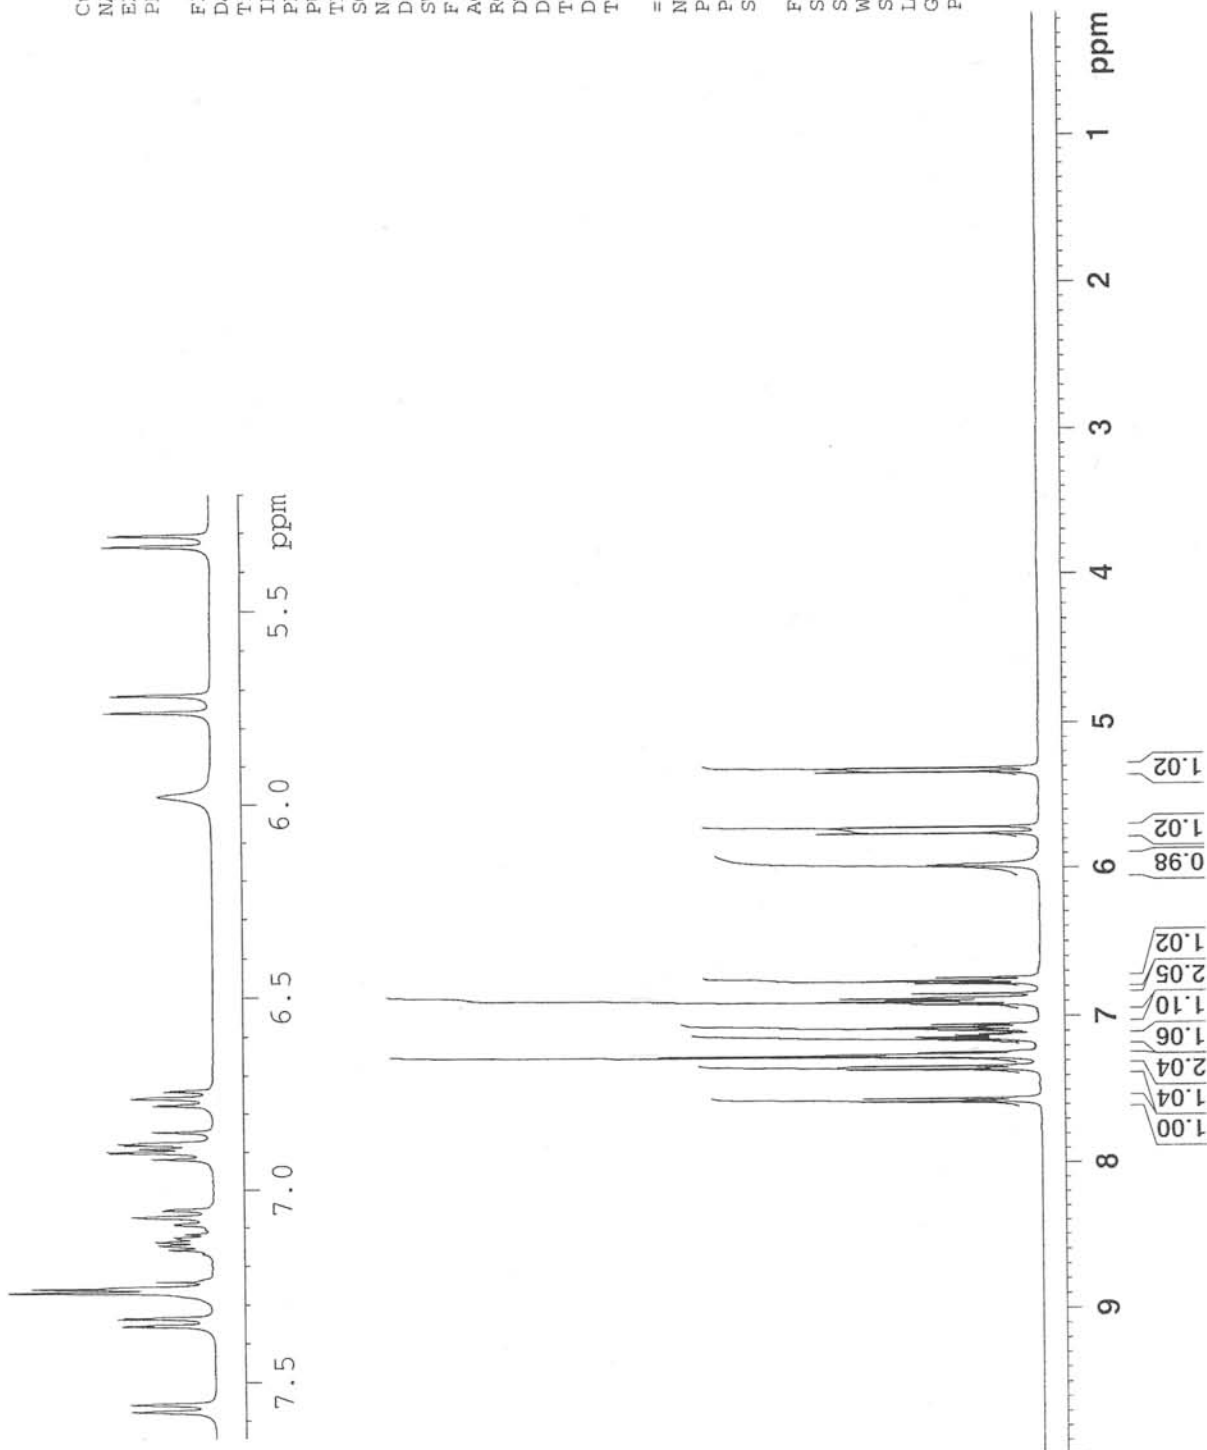

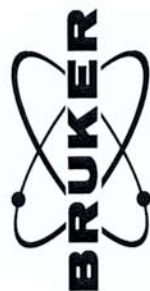

Current Data Parameters  
 NAME inter-1  
 EXPNO 2  
 PROCNO 1

F2 - Acquisition Parameters  
 Date\_ 20100410  
 Time 10.16  
 INSTRUM spect  
 PROBHD 5 mm QNP 1H/13  
 PULPROG zgpg30  
 TD 65536  
 SOLVENT CDCl3  
 NS 106  
 DS 4  
 SMH 23980.814 Hz  
 FIDRES 0.365918 Hz  
 AQ 1.3664756 sec  
 RG 1824.6  
 DW 20.850 usec  
 DE 6.00 usec  
 TE 294.2 K  
 D1 2.00000000 sec  
 d11 0.03000000 sec  
 DELTA 1.89999998 sec  
 TD0 1

===== CHANNEL f1 =====  
 NUC1 13C  
 P1 9.38 usec  
 PL1 0.00 dB  
 SFO1 100.6228298 MHz

===== CHANNEL f2 =====  
 CPDPRG2 waltz16  
 NUC2 1H  
 PCPD2 90.00 usec  
 PL2 0.00 dB  
 PL12 16.10 dB  
 PL13 19.00 dB  
 SFO2 400.1316005 MHz

F2 - Processing parameters  
 SI 32768  
 SF 100.6127690 MHz  
 EM  
 SSB 0  
 LB 1.00 Hz  
 GB 0  
 PC 1.40

77.39  
 77.07  
 76.75

141.35  
 138.42  
 138.51  
 132.51  
 132.31  
 129.56  
 128.72  
 127.49  
 126.97  
 124.44  
 123.21  
 120.72  
 119.74  
 116.40  
 115.10

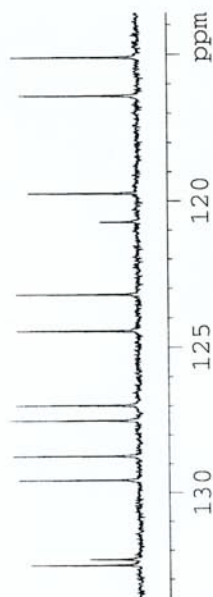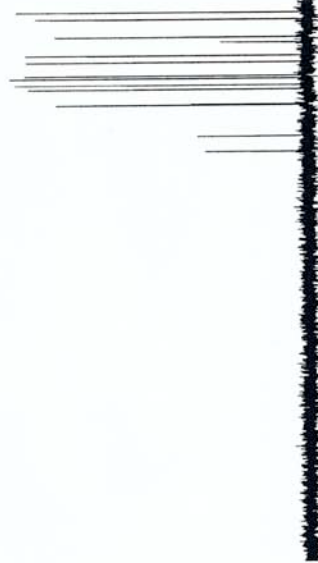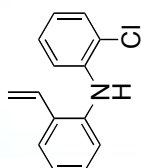

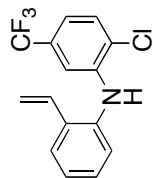

Current Data Parameters  
NAME 608  
EXPNO 2  
PROCNO 1

F2 - Acquisition Parameters  
Date\_ 20091228  
Time 11.42  
INSTRUM spect  
PROBHD 5 mm BBO BB-1H  
PULPROG zg30  
TD 65536  
SOLVENT CDC13  
NS 8  
DS 2  
SWH 8278.146  
FIDRES 0.126314  
AQ 3.9584243  
RG 128  
DW 60.400  
DE 6.00  
TE 294.2  
D1 1.00000000  
TD0 1

==== CHANNEL f1 ====  
NUC1 1H  
P1 15.07  
PL1 0.00  
SFO1 400.1324710

F2 - Processing parameters  
SI 65536  
SF 400.1300212  
WDW EM  
SSB 0  
LB 0.30  
GB 0  
PC 1.00

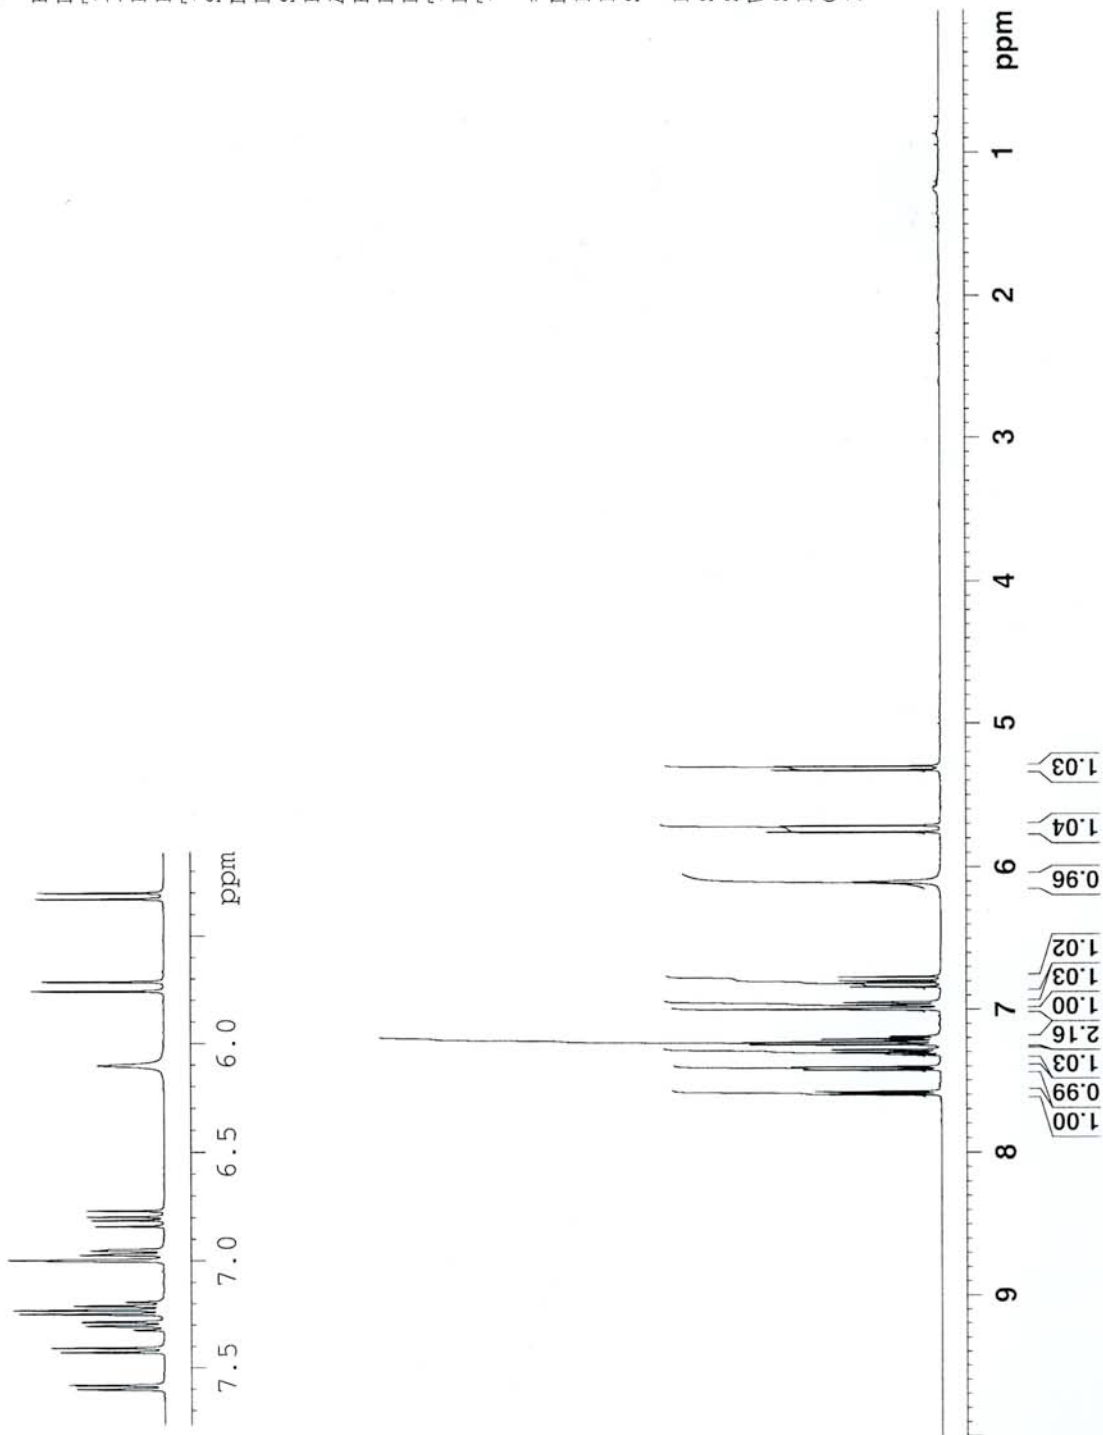

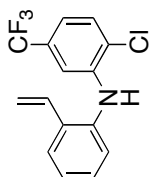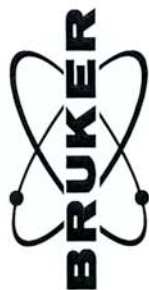

Current Data Parameters  
NAME 608  
EXPNO 3  
PROCNO 1

F2 - Acquisition Parameters  
Date\_ 20091228  
Time 11.54  
INSTRUM spect  
PROBHD 5 mm BBO BB-1H  
PULPROG zgpg30  
TD 65536  
SOLVENT CDCl3  
NS 128  
DS 2  
SWH 23980.814 Hz  
FIDRES 0.365918 Hz  
AQ 1.3664756 sec  
RG 8192  
DW 20.850 usec  
DE 6.00 usec  
TE 294.2 K  
D1 2.00000000 sec  
d11 0.03000000 sec  
DELTA 1.89999998 sec  
TD0 1

===== CHANNEL f1 =====  
NUC1 13C  
P1 8.75 usec  
PL1 -3.00 dB  
SFO1 100.6228298 MHz

===== CHANNEL f2 =====  
CPDPRG2 waltz16  
NUC2 1H  
PCPD2 90.00 usec  
PL2 -1.00 dB  
PL12 14.52 dB  
PL13 18.00 dB  
SFO2 400.1316005 MHz

F2 - Processing parameters  
SI 65536  
SF 100.6127513 MHz  
WDW EM  
SSB 0  
LB 1.00 Hz  
GB 0  
FC 3.40

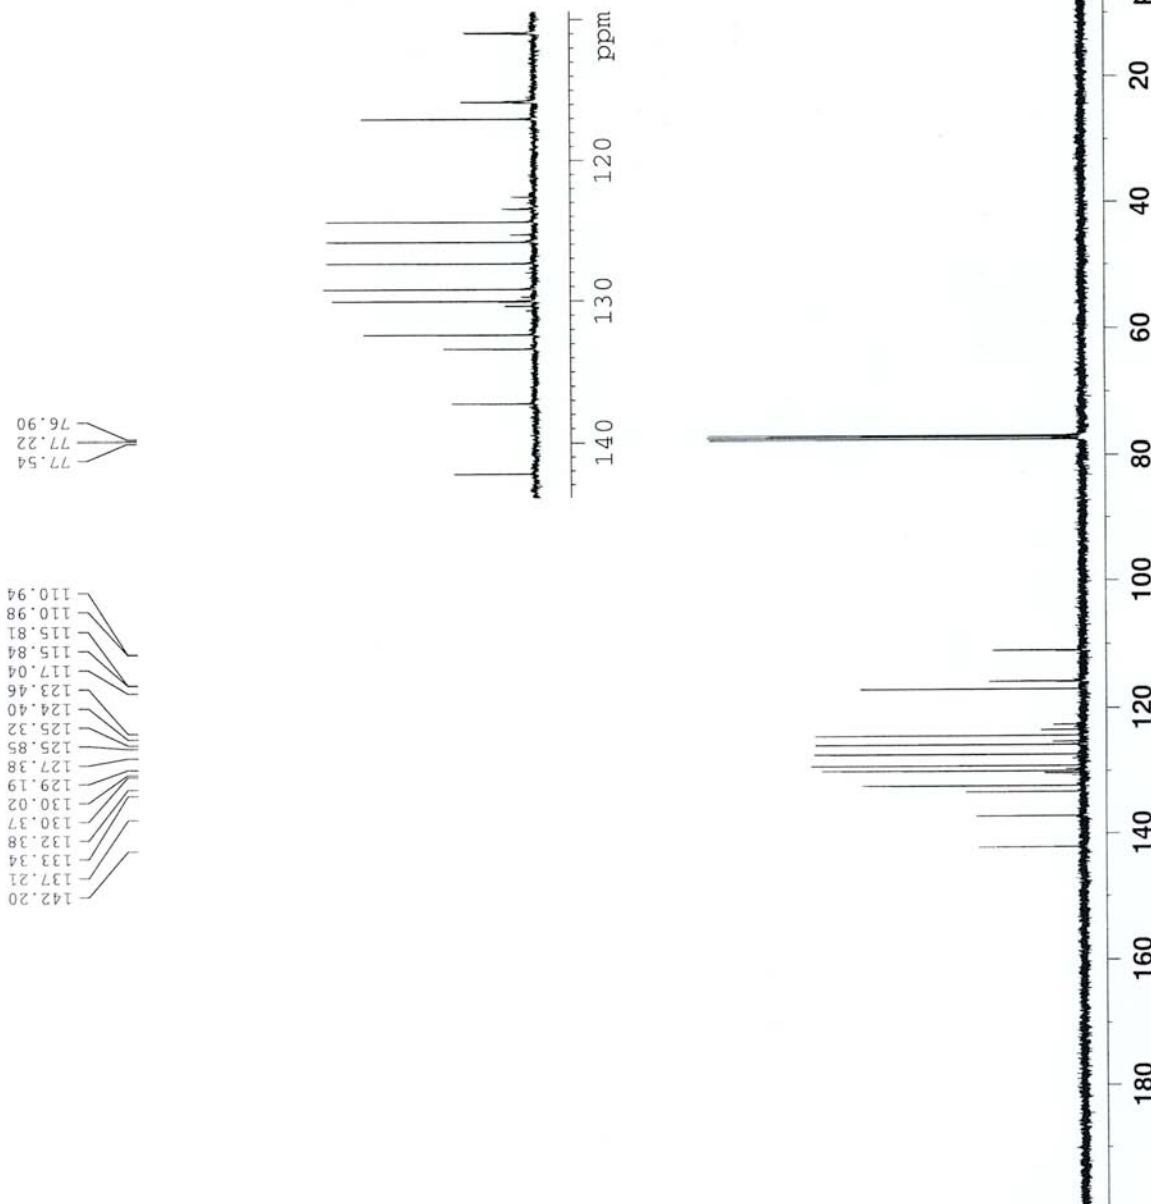

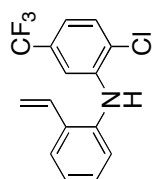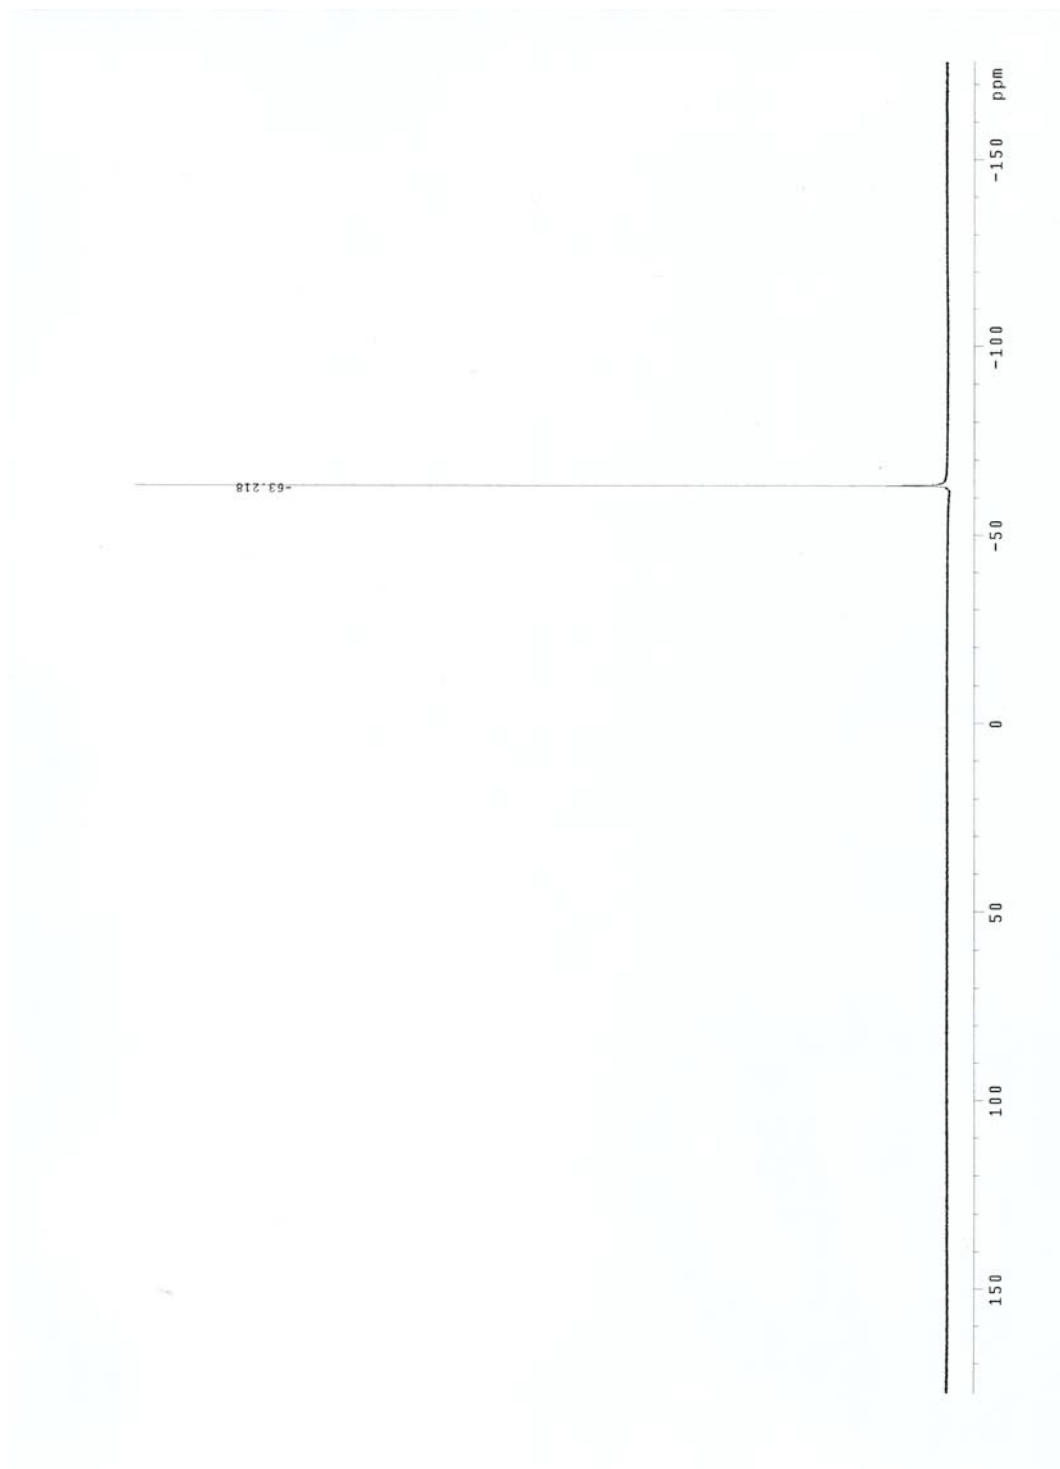

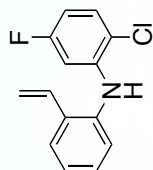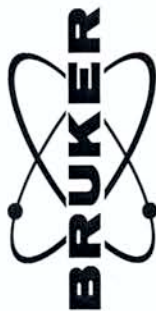

Current Data Parameters  
 NAME 526  
 EXPNO 3  
 PROCNO 1

F2 - Acquisition Parameters  
 Date\_ 20091026  
 Time 16.29  
 INSTRUM spect  
 PROBHD 5 mm QNP 1H/13  
 PULPROG zg30  
 TD 65536  
 SOLVENT CDC13  
 NS 8  
 DS 2  
 SWH 8278.146 Hz  
 FIDRES 0.126314 Hz  
 AQ 3.9584243 sec  
 RG 57  
 DW 60.400 usec  
 DE 6.00 usec  
 TE 292.2 K  
 D1 1.00000000 sec  
 TD0 1

===== CHANNEL f1 =====  
 NUC1 1H  
 P1 14.00 usec  
 PL1 0.00 dB  
 SFO1 400.1324710 MHz

F2 - Processing parameters  
 SI 65536  
 SF 400.1300220 MHz  
 EM  
 SSB 0  
 LB 0.30 Hz  
 GB 0  
 PC 1.00

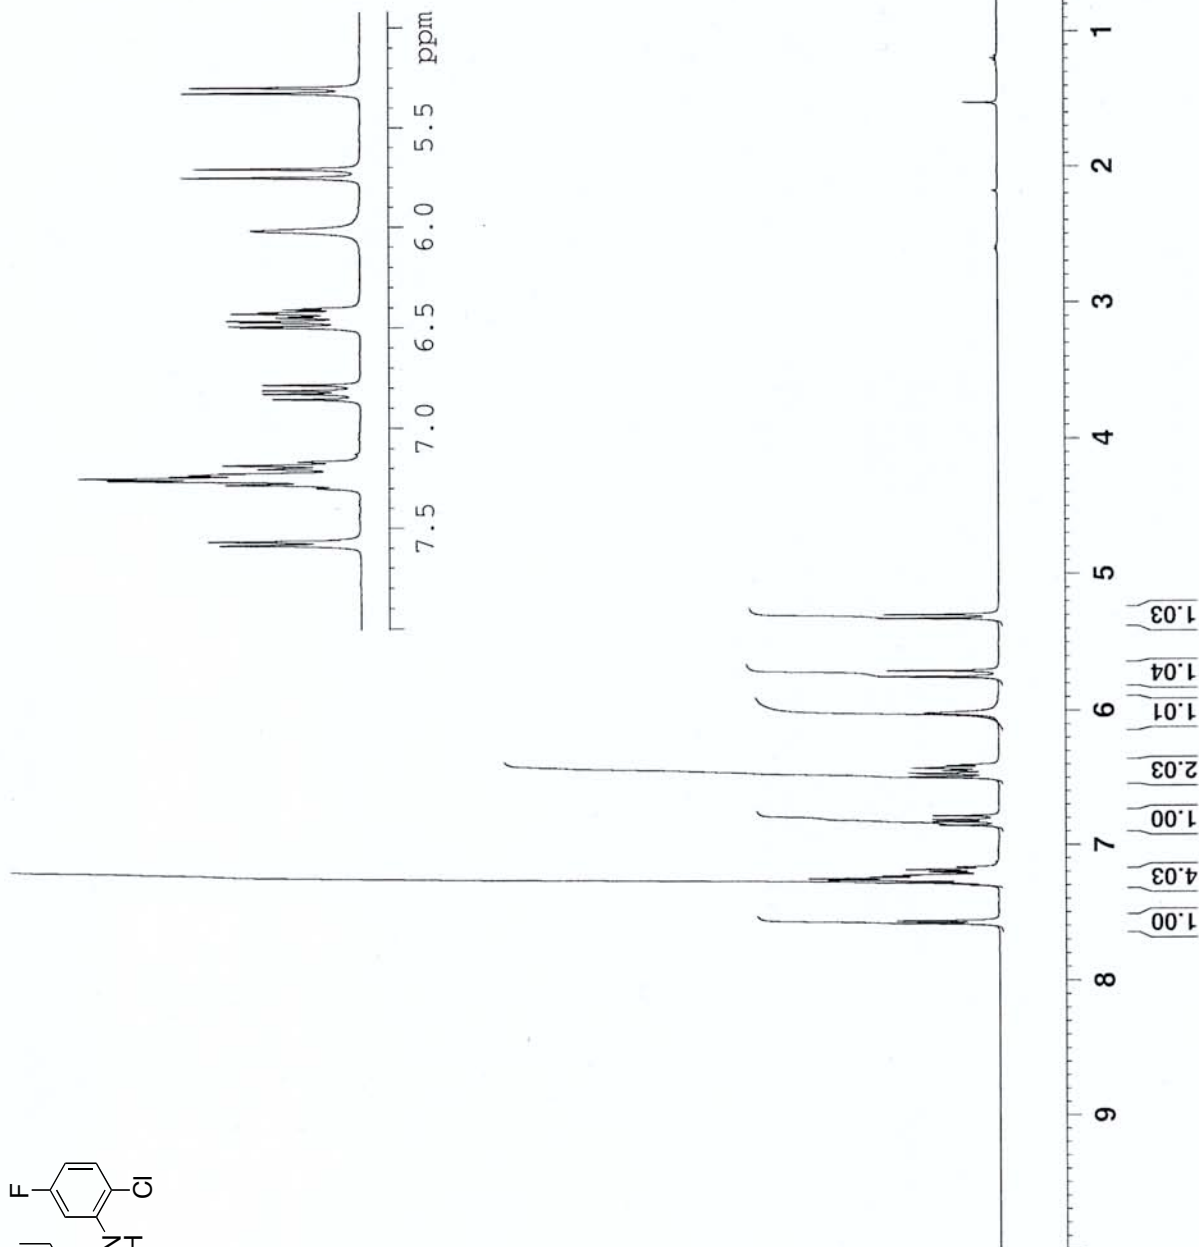

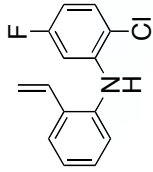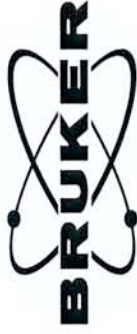

Current Data Parameters  
 NAME 526-1  
 EXPNO 2  
 PROCNO 1

F2 - Acquisition Parameters

Date\_ 20100326  
 Time 19.11  
 INSTRUM spect  
 PROBD 5 mm QNP 1H/13  
 PULPROG zgpg30  
 TD 65536  
 SOLVENT CDC13  
 NS 88  
 DS 4  
 SWH 23980.814 Hz  
 FIDRES 0.365918 Hz  
 AQ 1.3664756 sec  
 RG 4597.6  
 DW 20.850 usec  
 DE 6.00 usec  
 TE 296.2 K  
 D1 2.00000000 sec  
 d11 0.03000000 sec  
 DELTA 1.89999998 sec  
 TD0 1

===== CHANNEL f1 =====  
 NUC1 13C  
 P1 9.38 usec  
 PL1 0.00 dB  
 SFO1 100.6228298 MHz

===== CHANNEL f2 =====  
 CPDPRG2 waltz16  
 NUC2 1H  
 P2 90.00 usec  
 PL2 0.00 dB  
 PL12 16.10 dB  
 PL13 19.00 dB  
 SFO2 400.1316005 MHz

F2 - Processing parameters  
 SI 32768  
 SF 100.6127690 MHz  
 WDW EM  
 SSB 0  
 LB 1.00 Hz  
 GB 0  
 PC 1.40

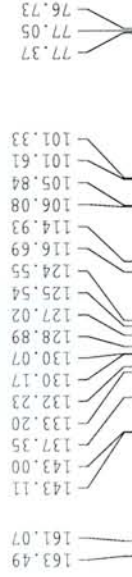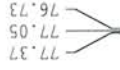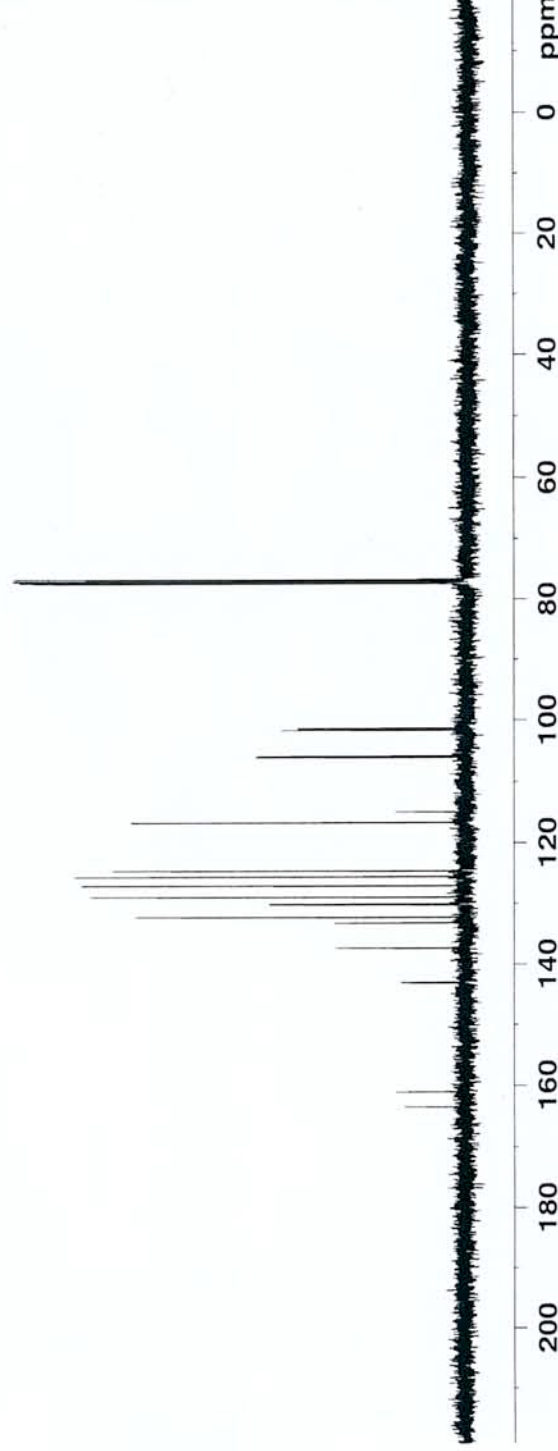

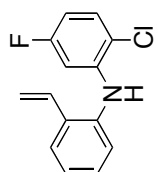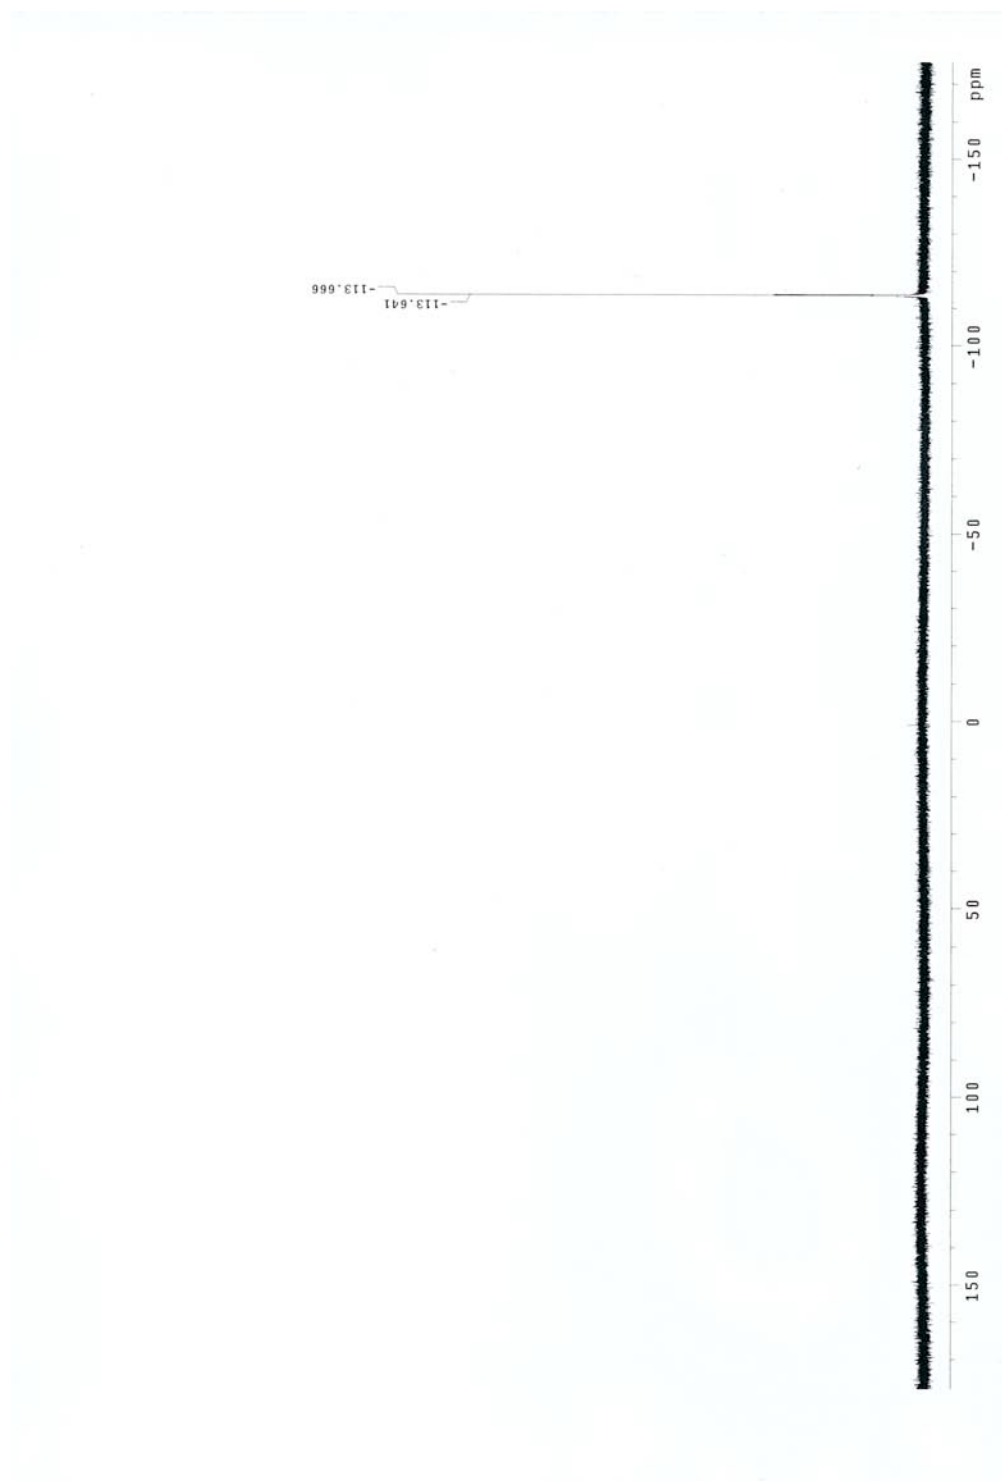

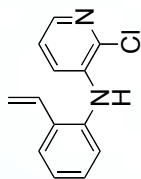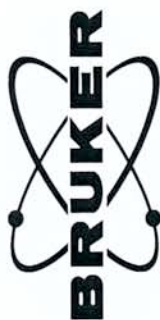

Current Data Parameters  
 NAME 551  
 EXPNO 1  
 PROCNO 1

F2 - Acquisition Parameters  
 Date\_ 20091111  
 Time 13.45  
 INSTRUM spect  
 PROBHD 5 mm QNP 1H/13  
 PULPROG zg30  
 TD 65536  
 SOLVENT CDCl3  
 NS 13  
 DS 2  
 SWH 8278.146 Hz  
 FIDRES 0.126314 Hz  
 AQ 3.9584243 sec  
 RG 322.5  
 DW 60.400 usec  
 DE 6.00 usec  
 TE 291.2 K  
 D1 1.00000000 sec  
 TD0 1

===== CHANNEL f1 =====  
 NUC1 1H  
 P1 14.00 usec  
 PL1 0.00 dB  
 SFO1 400.1324710 MHz

F2 - Processing parameters  
 SI 65536  
 SF 400.1300220 MHz  
 WDW EM  
 SSB 0  
 LB 0.30 Hz  
 GB 0  
 PC 1.00

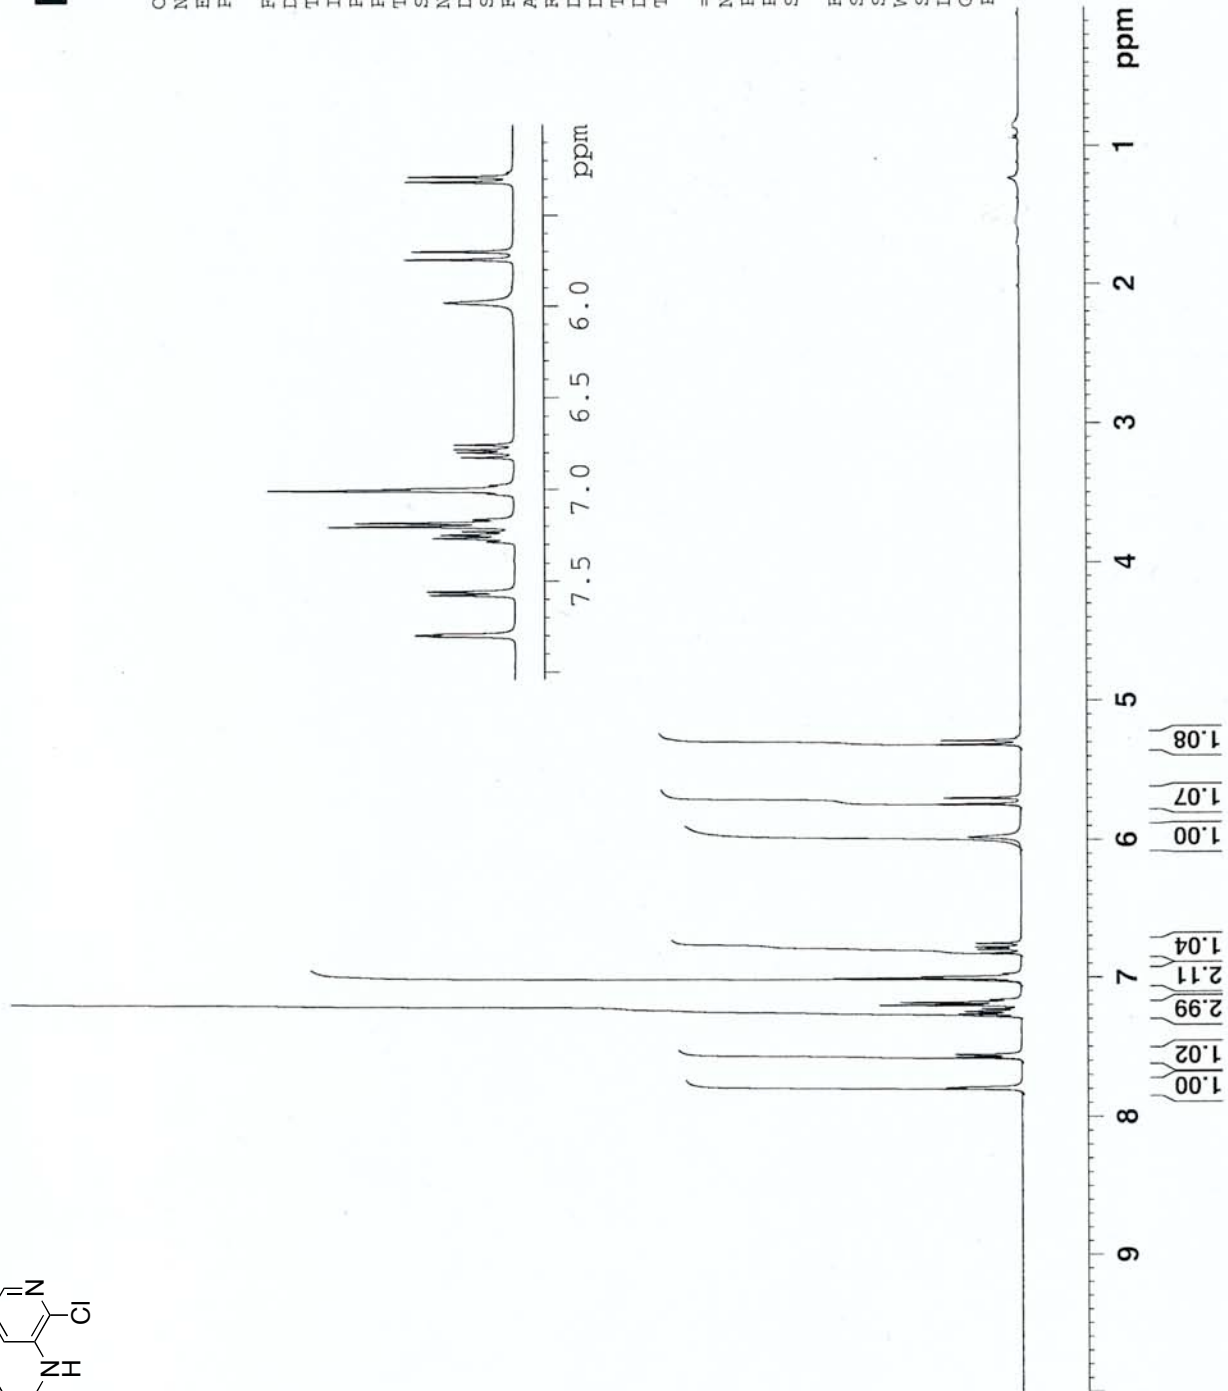

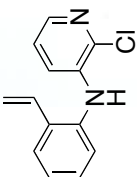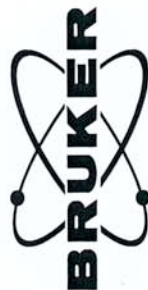

Current Data Parameters  
 NAME 551  
 EXPNO 2  
 PROCNO 1

F2 - Acquisition Parameters  
 Date\_ 20091111  
 Time 13.52  
 INSTRUM spect  
 PROBHD 5 mm QNP 1H/13  
 PULPROG zgpg30  
 TD 65536  
 SOLVENT CDCl3  
 NS 46  
 DS 4  
 SWH 23980.814 Hz  
 FIDRES 0.365918 Hz  
 AQ 1.3664756 sec  
 RG 1824.6  
 DW 20.850 usec  
 DE 6.00 usec  
 TE 292.2 K  
 D1 2.00000000 sec  
 d11 0.03000000 sec  
 DELTA 1.89999998 sec  
 TD0 1

==== CHANNEL f1 =====  
 NUC1 13C  
 P1 9.38 usec  
 PL1 0.00 dB  
 SFO1 100.6228298 MHz

==== CHANNEL f2 =====  
 CPDPRG2 waltz16  
 NUC2 1H  
 PCPD2 90.00 usec  
 PL2 0.00 dB  
 PL12 16.10 dB  
 PL13 19.00 dB  
 SFO2 400.1316005 MHz

F2 - Processing parameters  
 SI 32768  
 SF 100.6127690 MHz  
 EM  
 SSB 0  
 LB 1.00 Hz  
 GB 0  
 PC 1.40

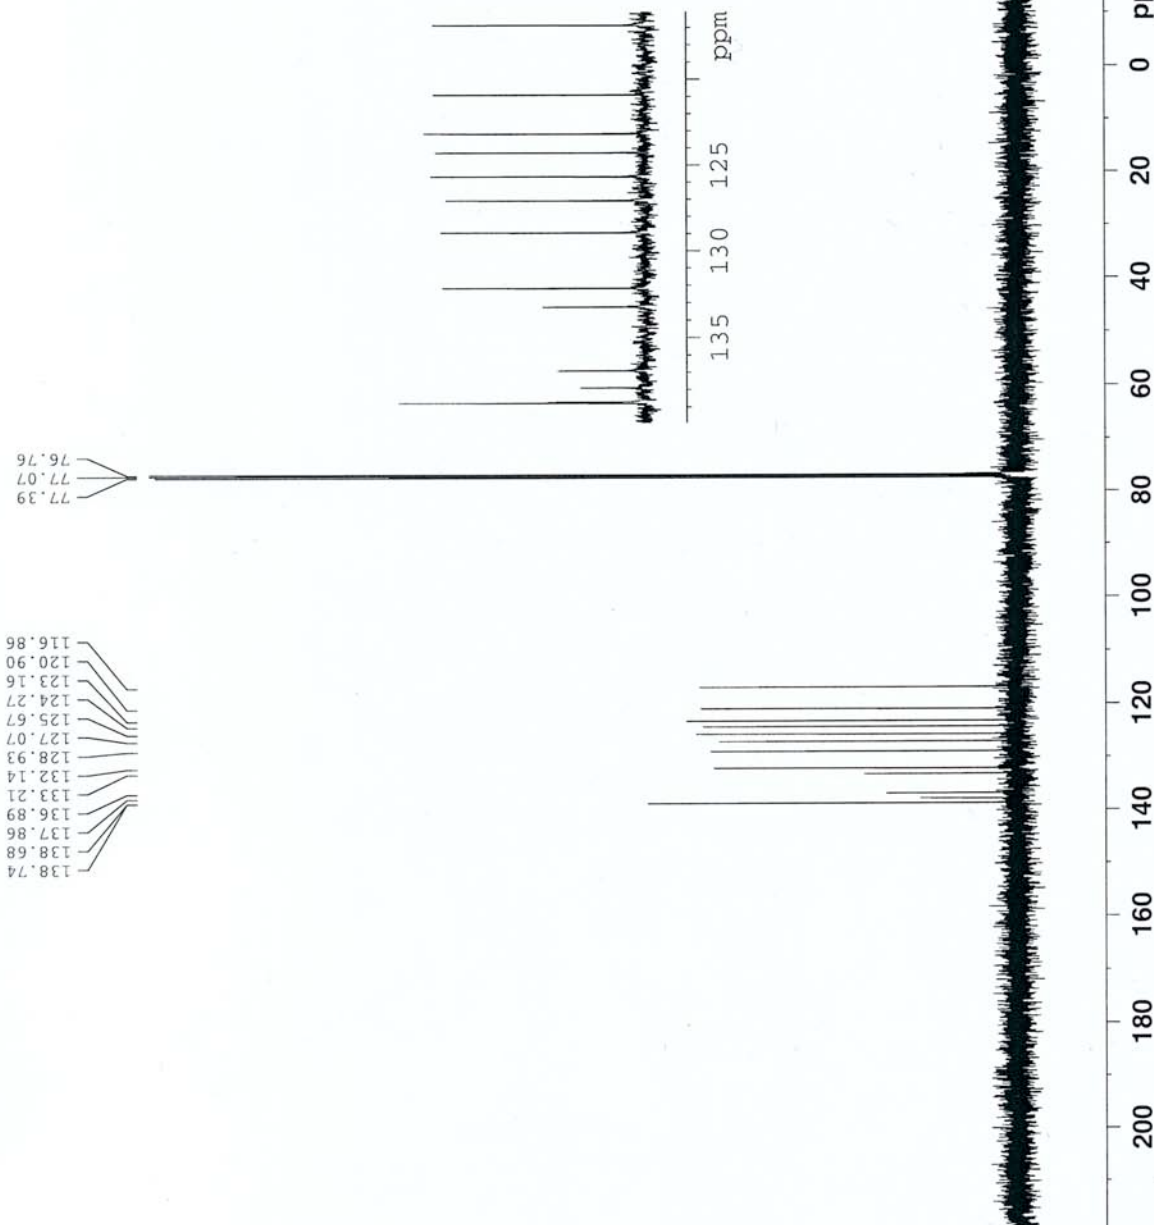

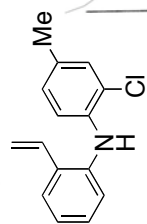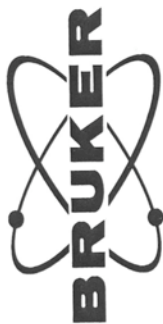

Current Data Parameters  
NAME 690  
EXPNO 1  
PROCNO 1

F2 - Acquisition Parameters  
Date\_ 20100610  
Time 7.10  
INSTRUM spect  
PROBHD 5 mm QNP 1H/13  
PULPROG zg30  
TD 65536  
SOLVENT CDCl3  
NS 7  
DS 2  
SWH 8278.146 Hz  
FIDRES 0.126314 Hz  
AQ 3.9584243 sec  
RG 114  
DW 60.400 usec  
DE 6.00 usec  
TE 294.2 K  
D1 1.00000000 sec  
TD0 1

===== CHANNEL f1 =====  
NUC1 1H  
P1 14.00 usec  
PL1 0.00 dB  
SFO1 400.1324710 MHz

F2 - Processing parameters  
SI 65536  
SF 400.1300220 MHz  
WDW EM  
SSB 0  
LB 0.30 Hz  
GB 0  
PC 1.00

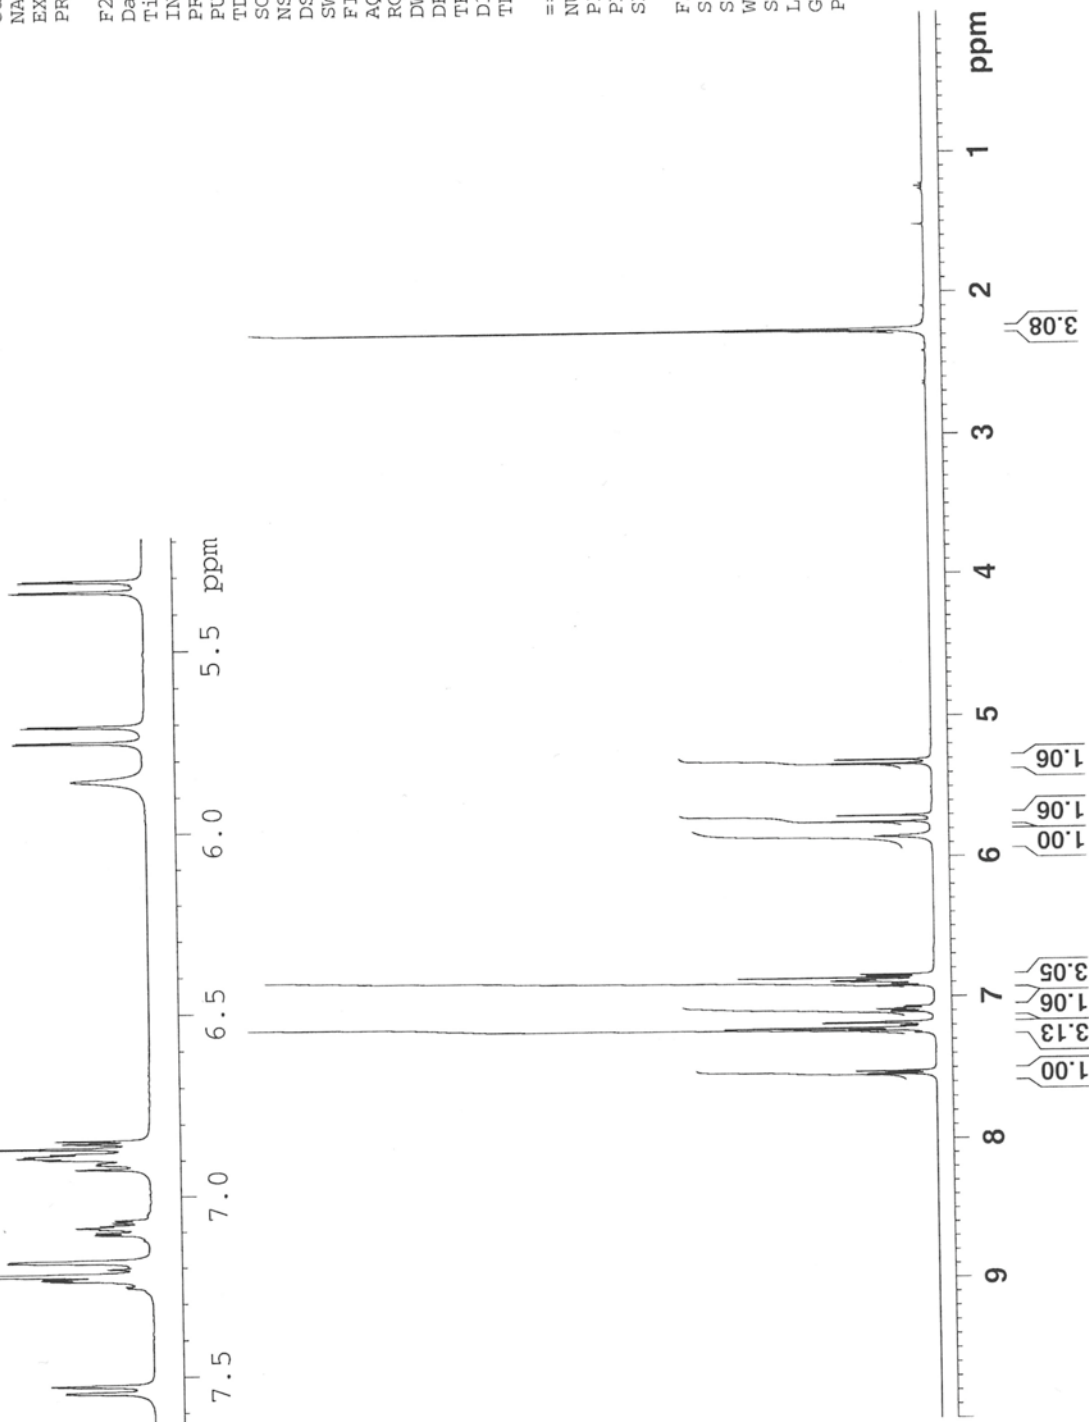

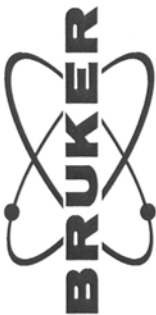

Current Data Parameters  
NAME 690  
EXPNO 2  
PROCNO 1

F2 - Acquisition Parameters  
Date\_ 20100610  
Time 7.19  
INSTRUM spect  
PROBHD 5 mm QNP 1H/13  
PULPROG zgpg30  
TD 65536  
SOLVENT CDCl3  
NS 70  
DS 4  
SWH 23980.814 Hz  
FIDRES 0.365918 Hz  
AQ 1.3664756 sec  
RG 1824.6  
DE 20.850 usec  
TE 294.2 K  
D1 2.00000000 sec  
d11 0.03000000 sec  
DELTA 1.89999998 sec  
TD0 1

===== CHANNEL f1 =====  
NUC1 13C  
P1 9.38 usec  
PL1 0.00 dB  
SFO1 100.6228298 MHz

===== CHANNEL f2 =====  
CPDPRG2 waltz16  
NUC2 1H  
PCPD2 90.00 usec  
PL2 0.00 dB  
PL12 16.10 dB  
PL13 19.00 dB  
SFO2 400.1316005 MHz

F2 - Processing parameters  
SI 32768  
SF 100.6127690 MHz  
WDW EM  
SSB 0  
LB 1.00 Hz  
GB 0  
PC 1.40

139.15  
138.59  
137.61  
131.46  
129.95  
128.68  
128.09  
127.05  
123.68  
121.93  
121.18  
116.34  
115.98

77.41  
77.09  
76.77

20.38

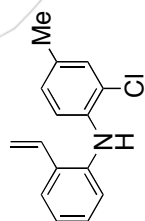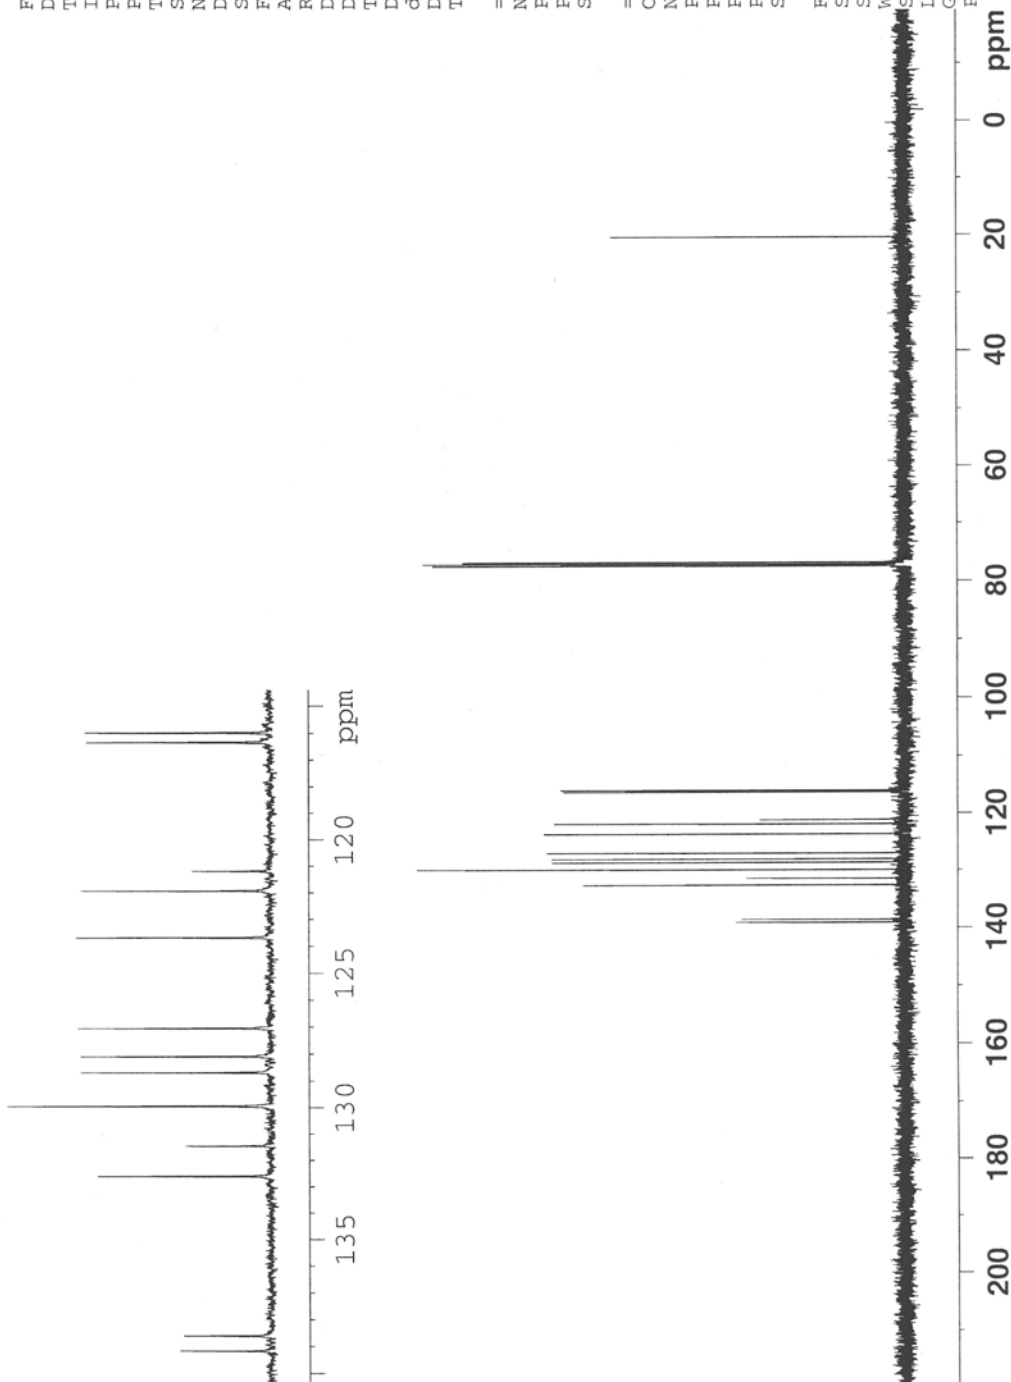

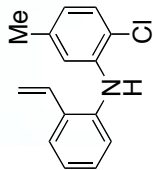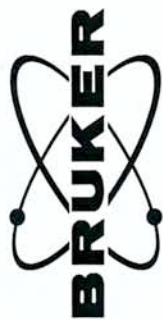

Current Data Parameters  
 NAME 529  
 EXNO 1  
 PROCNO 1

F2 - Acquisition Parameters  
 Date\_ 20091024  
 Time 17.52  
 INSTRUM spect  
 PROBD 5 mm QNP 1H/13  
 PULPROG zg30  
 TD 65536  
 SOLVENT CDCl3  
 NS 8  
 DS 2  
 SWH 8278.146 Hz  
 FIDRES 0.126314 Hz  
 AQ 3.9584243 sec  
 RG 181  
 DW 60.400 usec  
 DE 6.00 usec  
 TE 292.2 K  
 D1 1.00000000 sec  
 TD0 1

===== CHANNEL f1 =====  
 NUC1 1H  
 P1 14.00 usec  
 PL1 0.00 dB  
 SFO1 400.1324710 MHz

F2 - Processing parameters  
 SI 65536  
 SF 400.1300220 MHz  
 WDW EM  
 SSB 0  
 LB 0.30 Hz  
 GB 0  
 PC 1.00

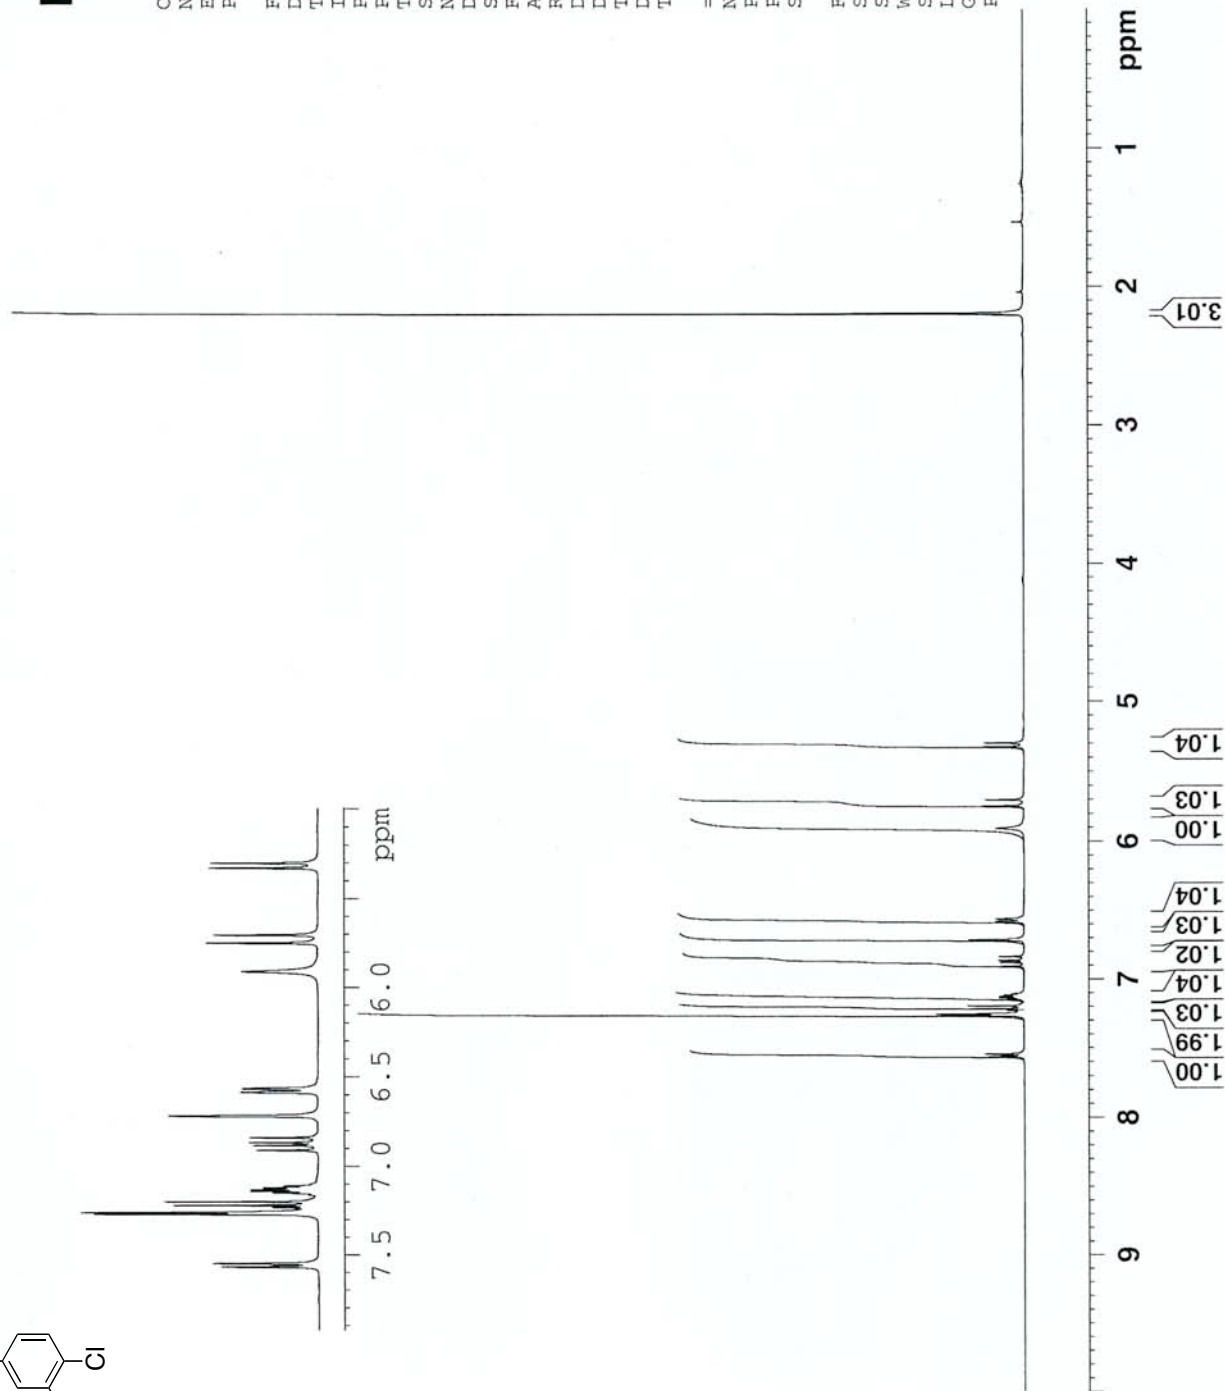

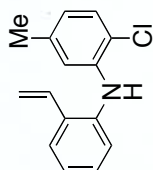

140.87  
138.57  
137.54  
132.56  
132.19  
129.18  
128.70  
126.97  
124.26  
123.13  
120.70  
117.87  
116.34  
115.71

77.40  
77.08  
76.76

21.35

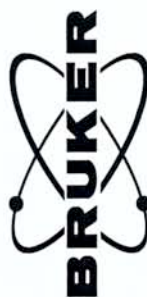

Current Data Parameters  
NAME 529  
EXPNO 2  
PROCNO 1

F2 - Acquisition Parameters  
Date\_ 20091024  
Time 18.01  
INSTRUM spect  
PROBHD 5 mm QNP 1H/13  
PULPROG zgpg30  
TD 65536  
SOLVENT CDC13  
NS 31  
DS 4  
SWH 23980.814 Hz  
FIDRES 0.365918 Hz  
AQ 1.3664756 sec  
RG 1824.6  
DW 20.850 usec  
DE 6.00 usec  
TE 292.2 K  
D1 2.00000000 sec  
d11 0.03000000 sec  
DELTA 1.89999998 sec  
TD0 1

===== CHANNEL f1 =====  
NUC1 13C  
P1 9.38 usec  
PL1 0.00 dB  
SFO1 100.6228298 MHz  
  
===== CHANNEL f2 =====  
CPDPRG2 waltz16  
NUC2 1H  
PCPD2 90.00 usec  
PL2 0.00 dB  
PL12 16.10 dB  
PL13 19.00 dB  
SFO2 400.1316005 MHz

F2 - Processing parameters  
SI 32768  
SF 100.6127690 MHz  
WDW EM  
SSB 0  
LB 1.00 Hz  
GB 0  
PC 1.40

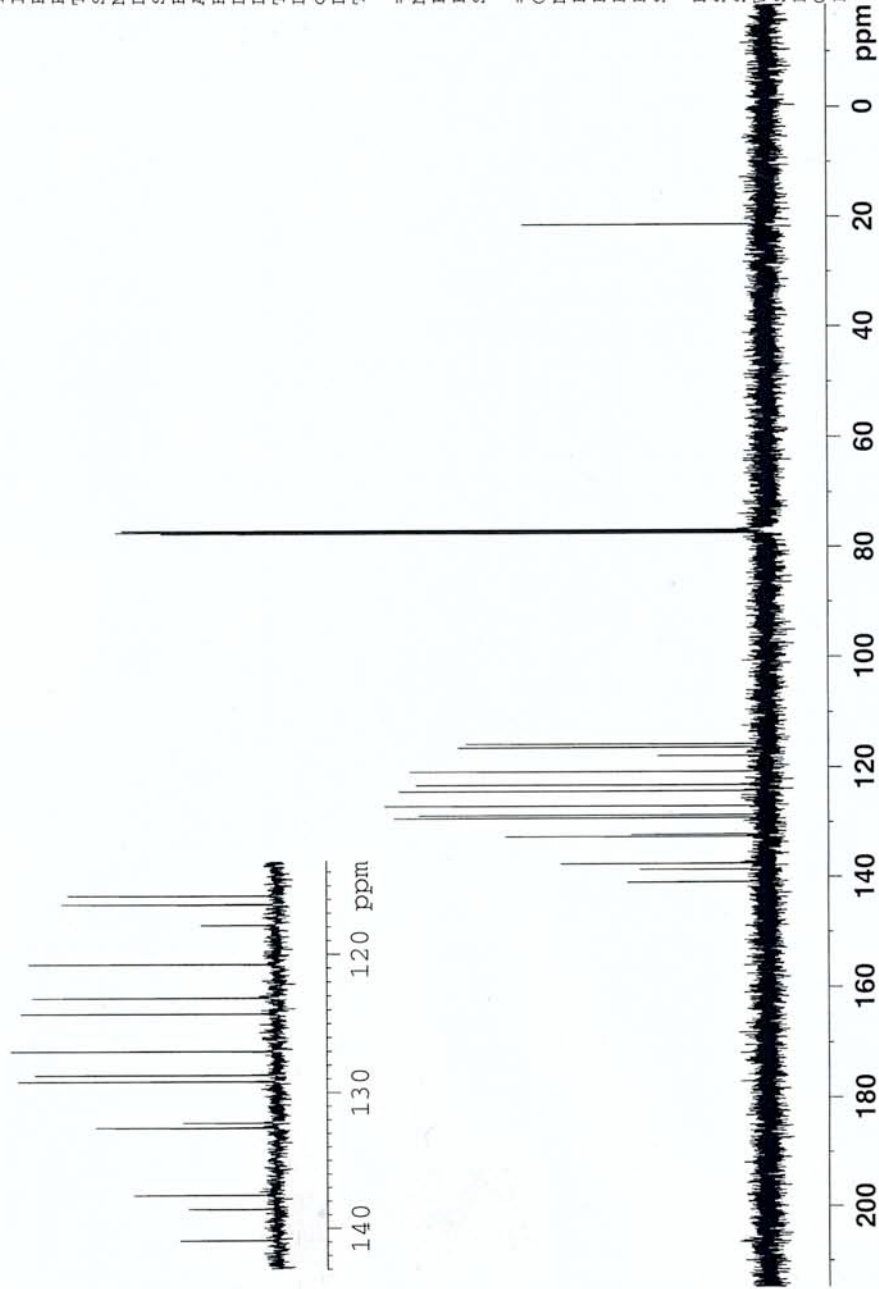

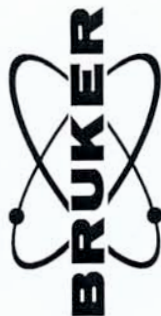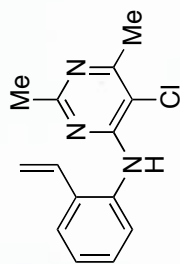

Current Data Parameters  
NAME 508 f  
EXPNO 1  
PROCNO 1

F2 - Acquisition Parameters

Date\_ 20090929  
Time 12.25  
INSTRUM spect  
PROBHD 5 mm QNP 1H/13  
PULPROG zg30  
TD 65536  
SOLVENT CDCl3  
NS 16  
DS 2  
SWH 8278.146 Hz  
FIDRES 0.126314 Hz  
AQ 3.9584243 sec  
RG 203.2  
DW 60.400 usec  
DE 6.00 usec  
TE 292.2 K  
D1 1.00000000 sec  
TD0 1

===== CHANNEL f1 =====  
NUC1 1H  
P1 14.00 usec  
PL1 0.00 dB  
SFO1 400.1324710 MHz

F2 - Processing parameters  
SI 65536  
SF 400.1300220 MHz  
WDW EM  
SSB 0  
LB 0.30 Hz  
GB 0  
PC 1.00

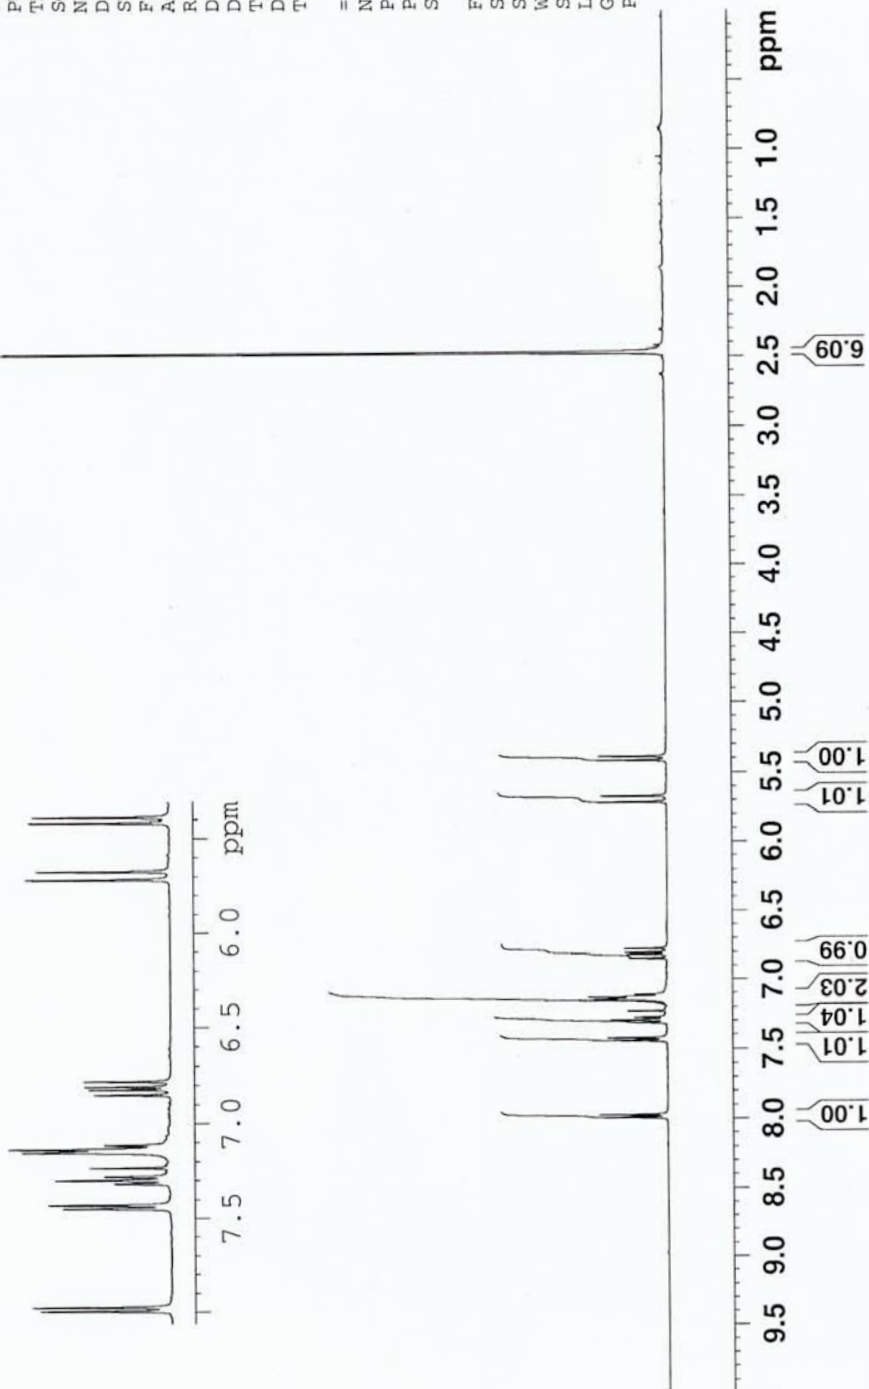

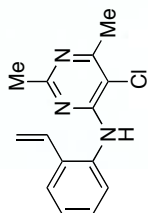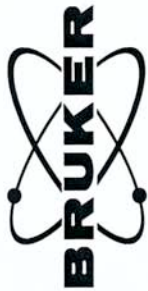

Current Data Parameters  
 NAME 508 f  
 EXPNO 2  
 PROCNO 1

F2 - Acquisition Parameters  
 Date\_ 20090929  
 Time 12.36  
 INSTRUM spect  
 PROBHD 5 mm QNP 1H/13  
 PULPROG zgpg30  
 TD 65536  
 SOLVENT CDCl3  
 NS 54  
 DS 4  
 SWH 23980.814 Hz  
 FIDRES 0.365918 Hz  
 AQ 1.3664756 sec  
 RG 9195.2  
 DW 20.850 usec  
 DE 6.00 usec  
 TE 292.2 K  
 D1 2.00000000 sec  
 d11 0.03000000 sec  
 DELTA 1.89999998 sec  
 TD0 1

===== CHANNEL f1 =====  
 NUC1 13C  
 P1 9.38 usec  
 PL1 0.00 dB  
 SFO1 100.6228298 MHz

===== CHANNEL f2 =====  
 CPDPRG2 waltz16  
 NUC2 1H  
 FCPD2 90.00 usec  
 PL2 0.00 dB  
 PL12 16.10 dB  
 PL13 19.00 dB  
 SFO2 400.1316005 MHz

F2 - Processing parameters  
 SI 32768  
 SF 100.6127690 MHz  
 EM  
 SSB 0  
 LB 1.00 Hz  
 GB 0  
 PC 1.40

25.66  
 22.13

77.39  
 77.07  
 76.75

135.12  
 132.28  
 130.94  
 128.30  
 127.08  
 124.86  
 123.43  
 118.20  
 111.20

164.46  
 161.47  
 155.51

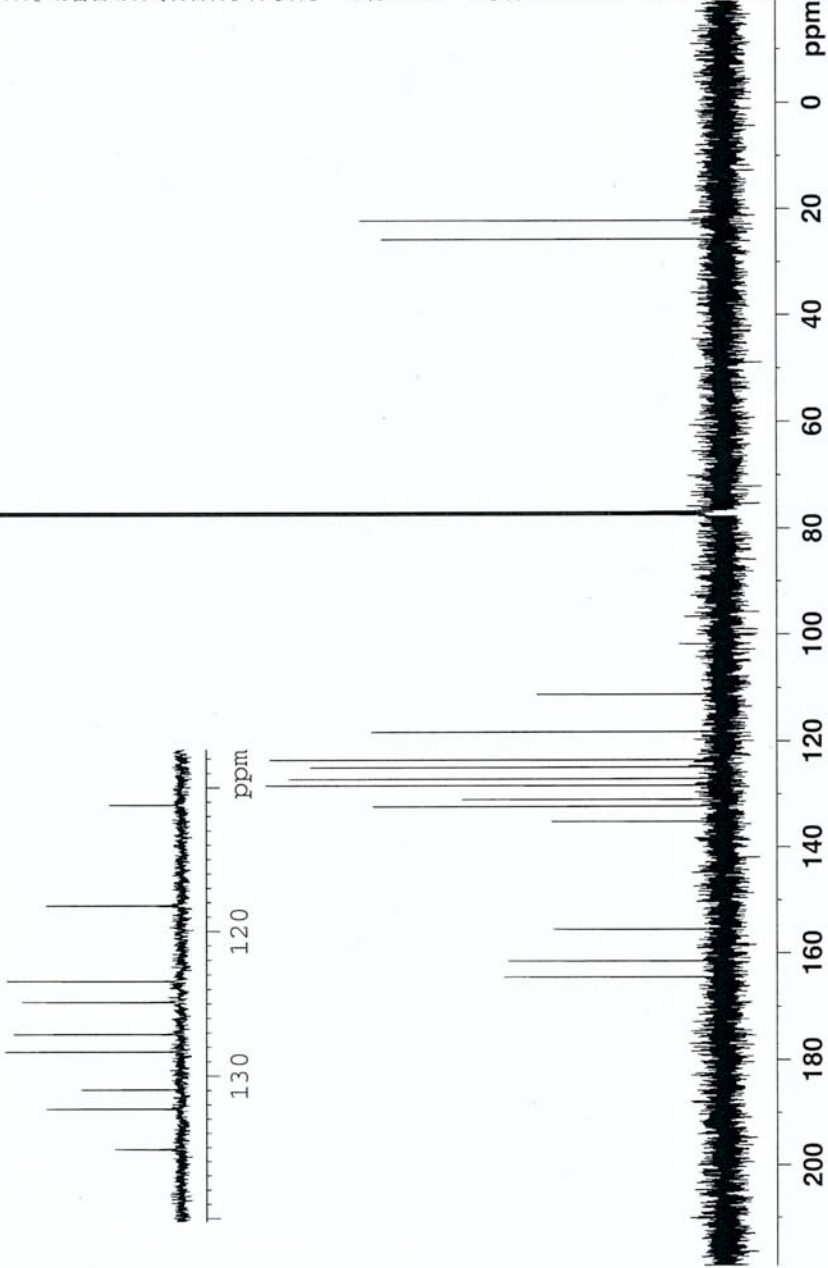

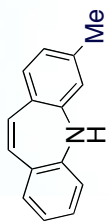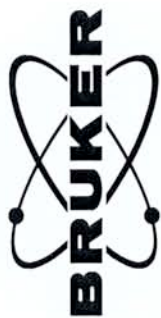

Current Data Parameters  
 NAME 583-2  
 EXPNO 2  
 PROCNO 1

F2 - Acquisition Parameters  
 Date\_ 20100327  
 Time 9.23  
 INSTRUM spect  
 PROBHD 5 mm QNP 1H/13  
 PULPROG zg30  
 TD 65536  
 SOLVENT CDCl3  
 NS 18  
 DS 2  
 SWH 8278.146 Hz  
 FIDRES 0.126314 Hz  
 AQ 3.9584243 sec  
 RG 57  
 DW 60.400 usec  
 DE 6.00 usec  
 TE 294.2 K  
 D1 1.00000000 sec  
 TD0 1

===== CHANNEL f1 =====  
 NUC1 1H  
 P1 14.00 usec  
 PL1 0.00 dB  
 SF01 400.1324710 MHz

F2 - Processing parameters  
 SI 65536  
 SF 400.1300220 MHz  
 WDW EM  
 SSB 0  
 LB 0.30 Hz  
 GB 0  
 PC 1.00

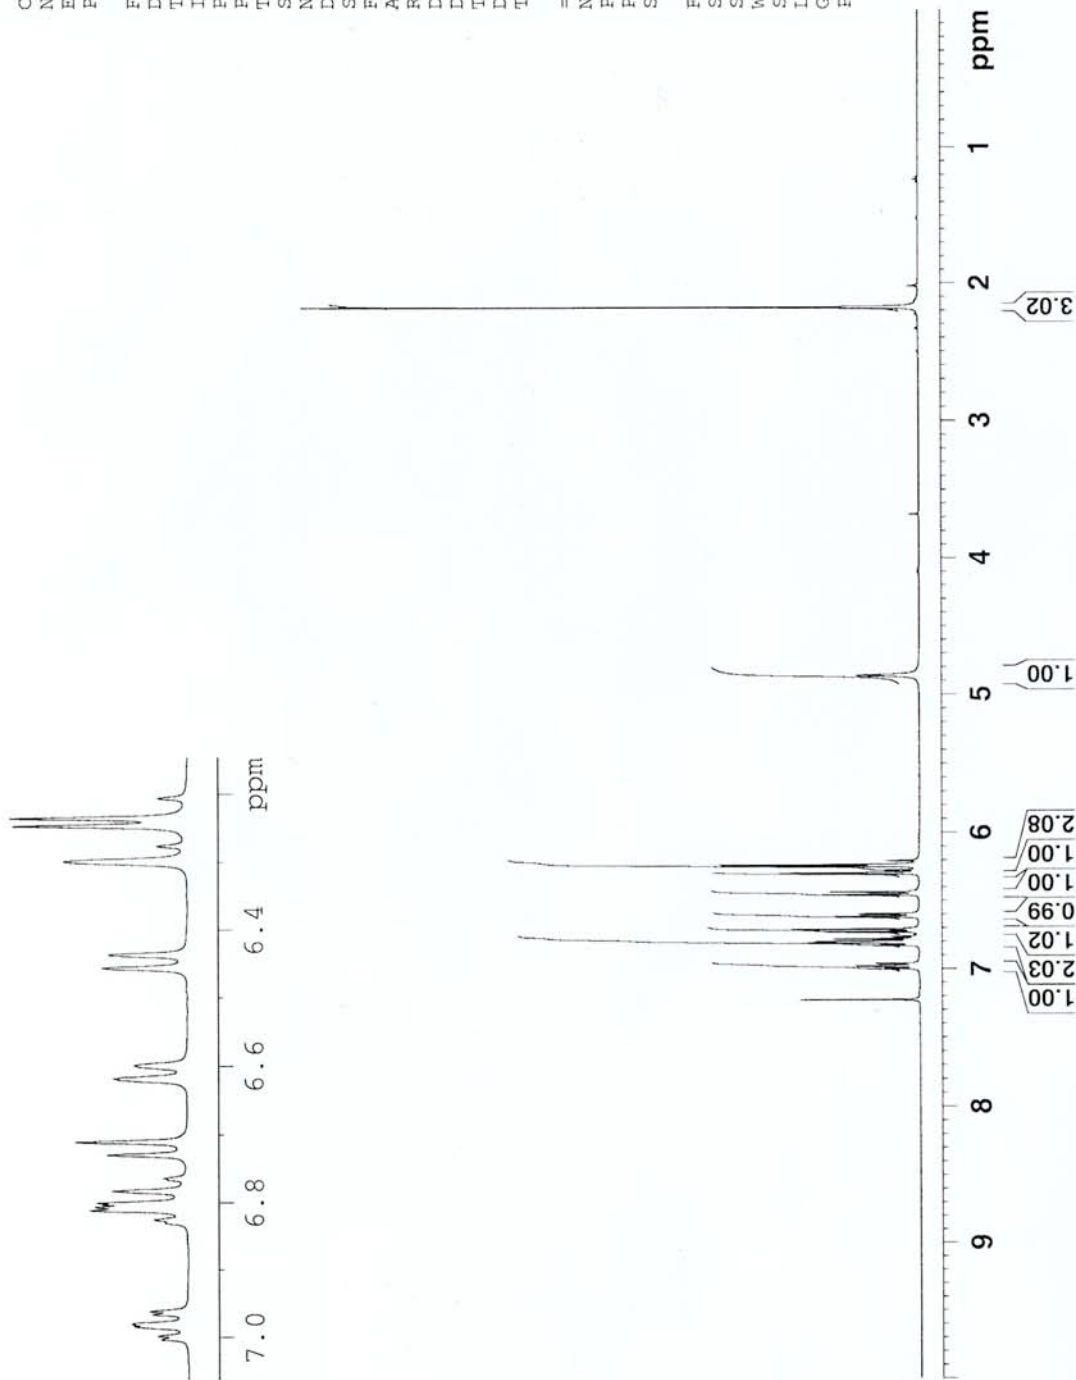

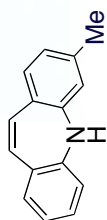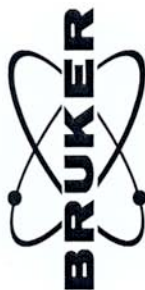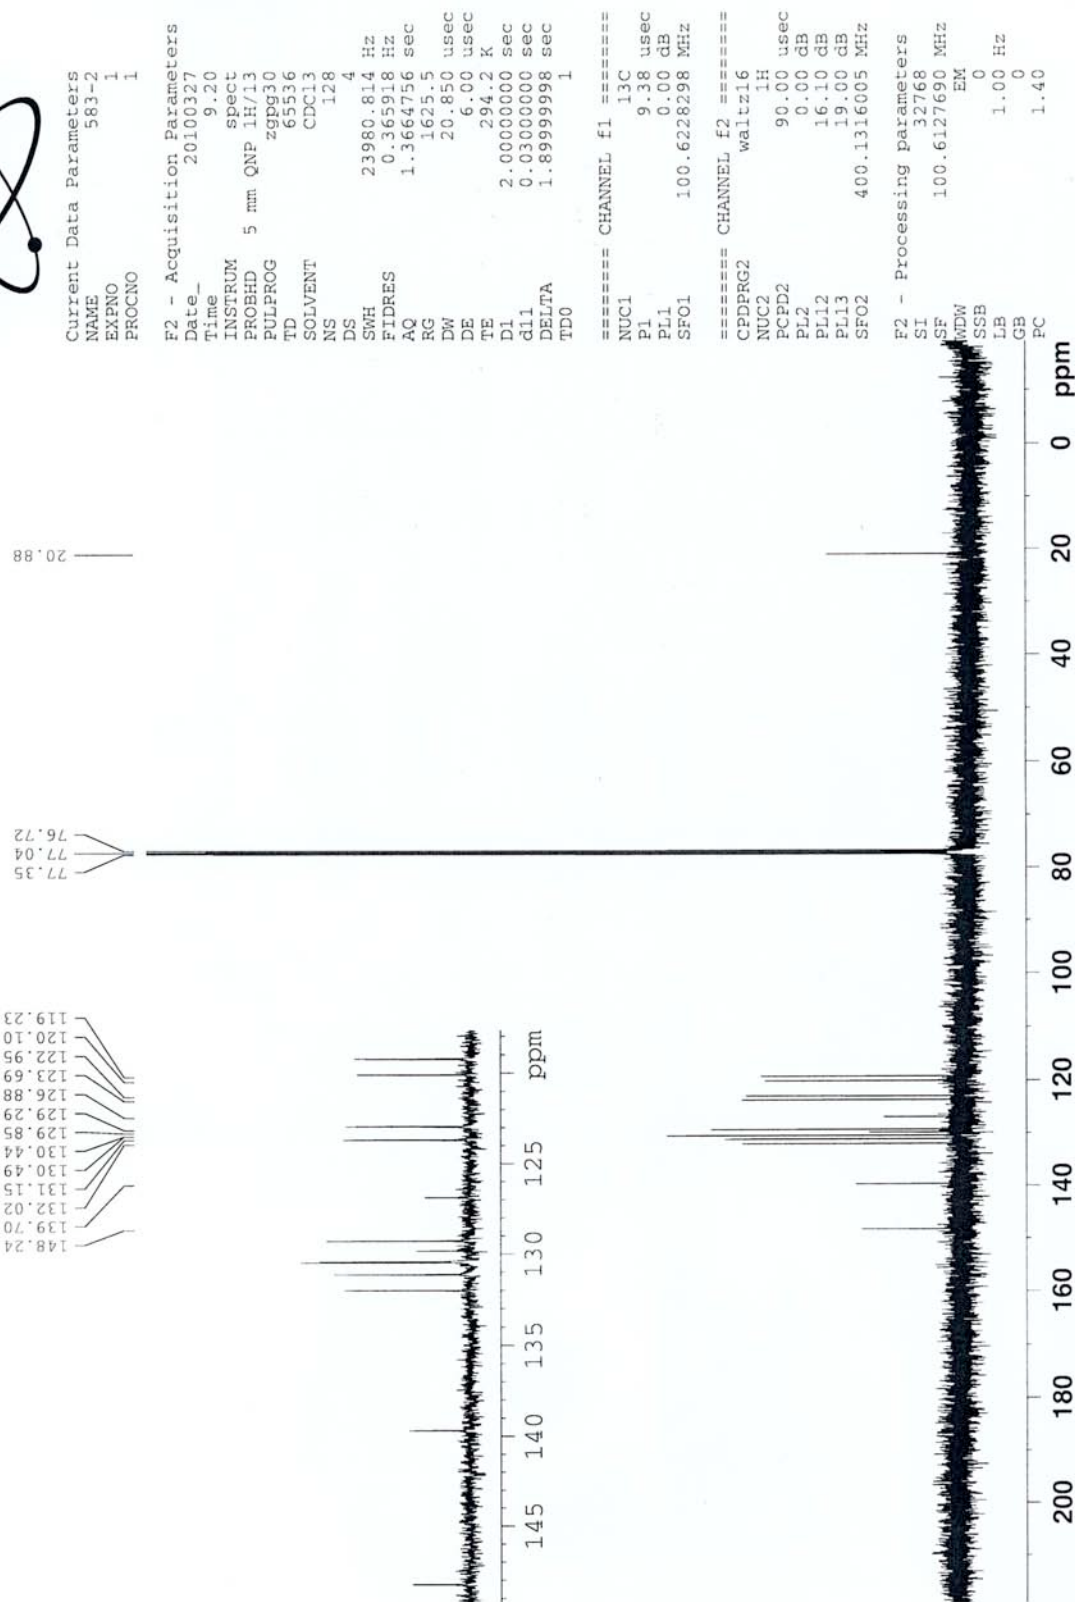

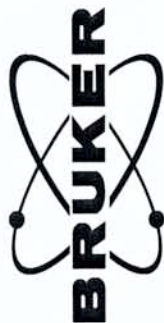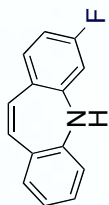

Current Data Parameters  
NAME 533-2  
EXPNO 2  
PROCNO 1

F2 - Acquisition Parameters  
Date\_ 20100327  
Time 9.31  
INSTRUM spect  
PROBHD 5 mm QNP 1H/13  
PULPROG zg30  
TD 65536  
SOLVENT CDCl3  
NS 17  
DS 2  
SWH 8278.146 Hz  
FIDRES 0.126314 Hz  
AQ 3.9584243 sec  
RG 322.5  
DW 60.400 usec  
DE 6.00 usec  
TE 294.2 K  
D1 1.00000000 sec  
TD0 1

==== CHANNEL f1 =====  
NUC1 1H  
P1 14.00 usec  
PL1 0.00 dB  
SF01 400.1324710 MHz

F2 - Processing parameters  
SI 65536  
SF 400.1300220 MHz  
WDW EM  
SSB 0  
LB 0.30 Hz  
GB 0  
PC 1.00

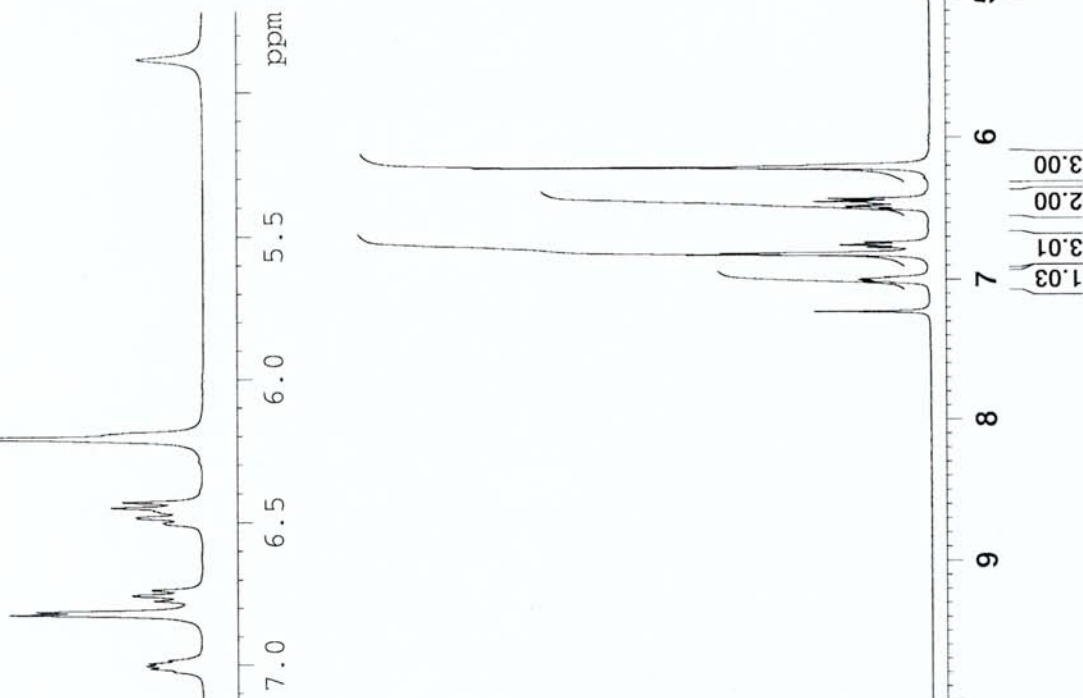

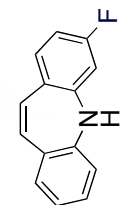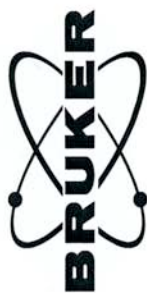

Current Data Parameters  
 NAME 533 4  
 EXPNO 1  
 PROCNO 1

F2 - Acquisition Parameters  
 Date\_ 20100331  
 Time 8.30  
 INSTRUM spect  
 PROBD 5 mm QNP 1H/13  
 PULPROG zgpg30  
 TD 65536  
 SOLVENT CDCl3  
 NS 839  
 DS 4  
 SWH 23980.814 Hz  
 FIDRES 0.365918 Hz  
 AQ 1.3664756 sec  
 RG 1824.6  
 DW 20.850 usec  
 DE 6.00 usec  
 TE 295.2 K  
 D1 2.00000000 sec  
 d11 0.03000000 sec  
 DELTA 1.89999998 sec  
 TDO 1

===== CHANNEL f1 =====  
 NUC1 13C  
 P1 9.38 usec  
 PL1 0.00 dB  
 SFO1 100.6228298 MHz

===== CHANNEL f2 =====  
 CPDPRG2 waltz16  
 NUC2 1H  
 PCPD2 90.00 usec  
 PL2 0.00 dB  
 PL12 16.10 dB  
 PL13 19.00 dB  
 SFO2 400.1316005 MHz

F2 - Processing parameters  
 SI 32768  
 SF 100.6127690 MHz  
 EM  
 SSB 0  
 LB 1.00 Hz  
 GB 0  
 PC 1.40

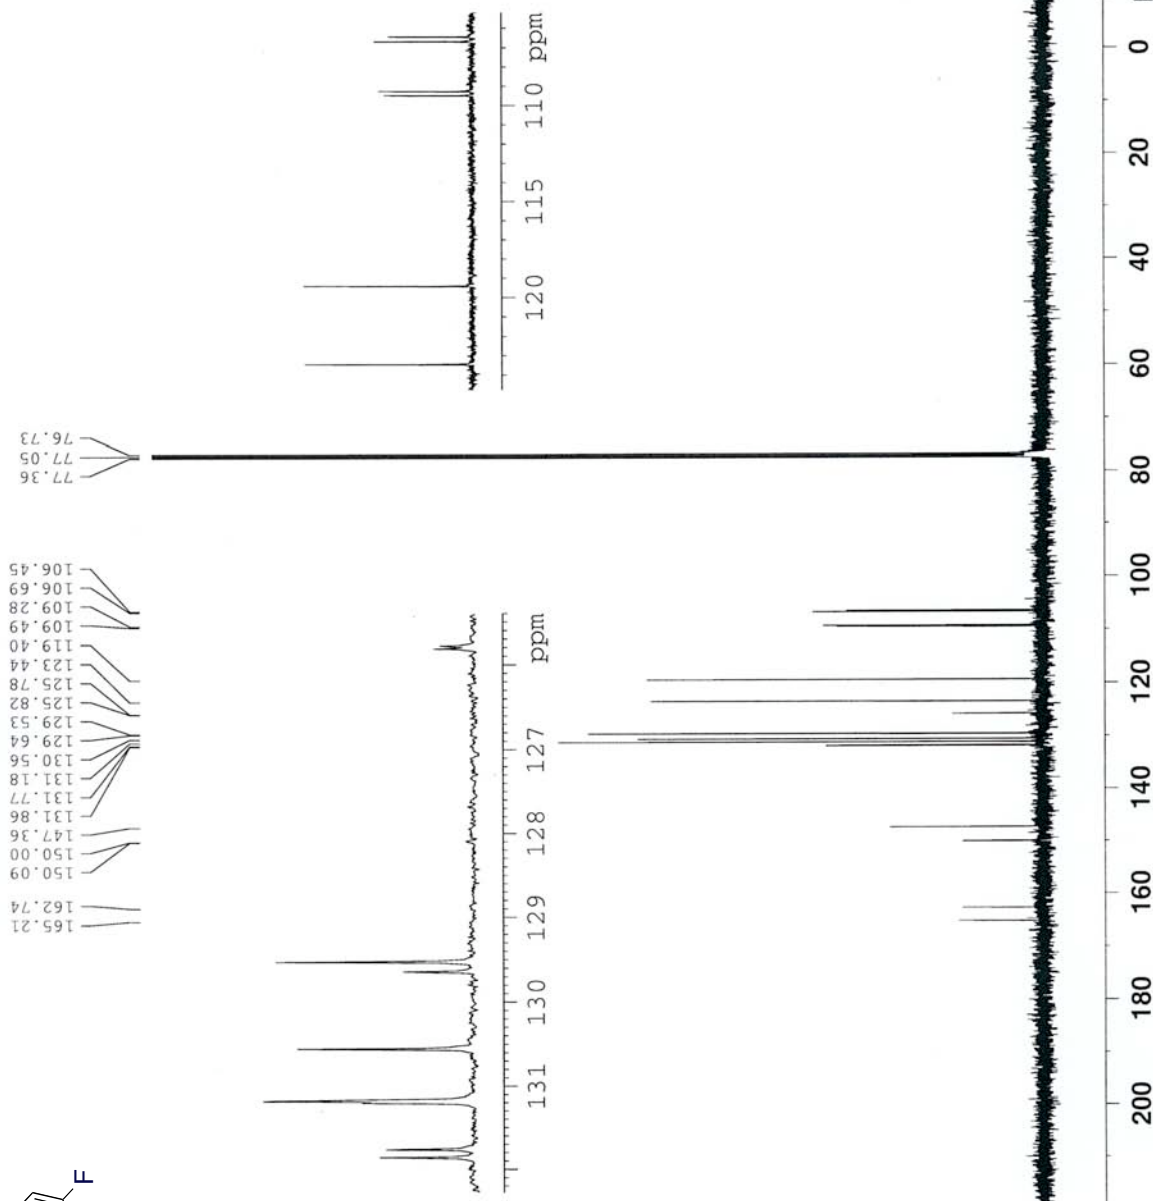

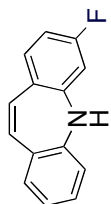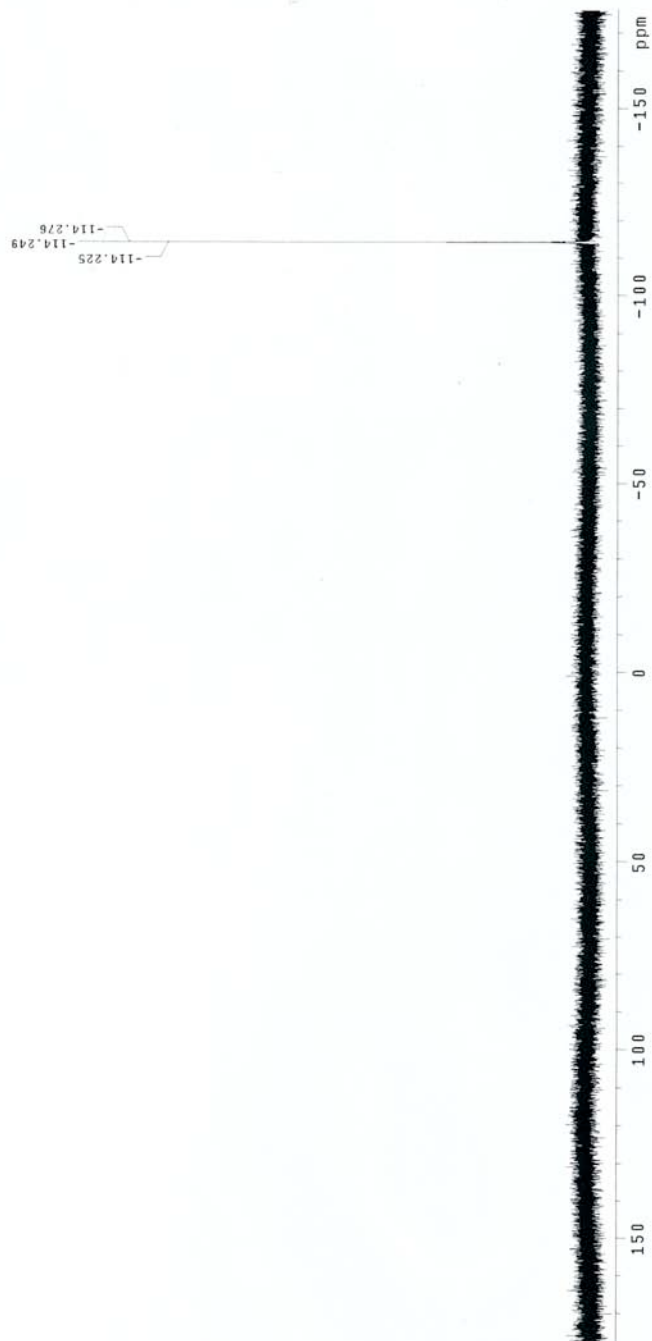

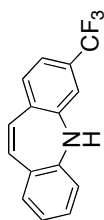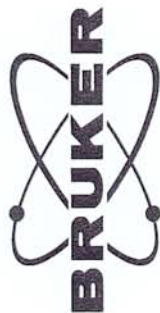

Current Data Parameters  
 NAME 644-f  
 EXPNO 2  
 PROCNO 1

F2 - Acquisition Parameters  
 Date\_ 20100408  
 Time 11.56  
 INSTRUM spect  
 PROHD 5 mm QNP 1H/13  
 PULPROG zg30  
 TD 65536  
 SOLVENT CDC13  
 NS 6  
 DS 2  
 SWH 8278.146 Hz  
 FIDRES 0.126314 Hz  
 AQ 3.9584243 sec  
 RG 57  
 DW 60.400 usec  
 DE 6.00 usec  
 TE 294.2 K  
 D1 1.00000000 sec  
 TD0 1

===== CHANNEL f1 =====  
 NUC1 1H  
 P1 14.00 usec  
 PL1 0.00 dB  
 SFO1 400.1324710 MHz

F2 - Processing parameters  
 SI 65536  
 SF 400.1300220 MHz  
 WDW EM  
 SSB 0  
 LB 0.30 Hz  
 GB 0  
 PC 1.00

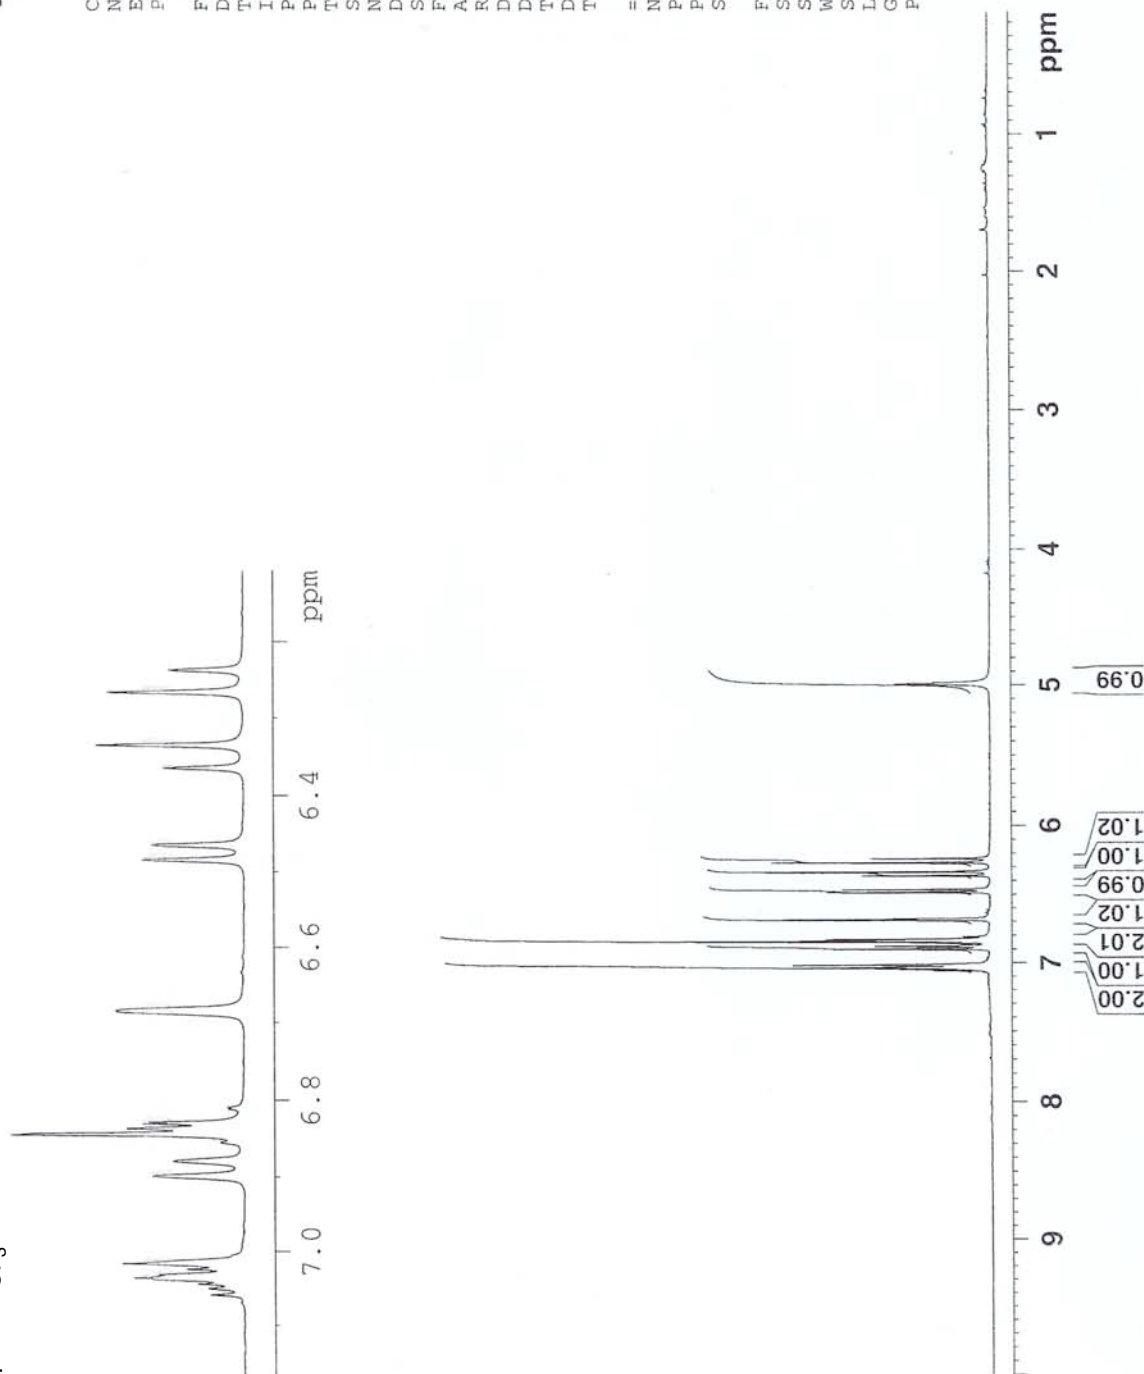

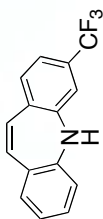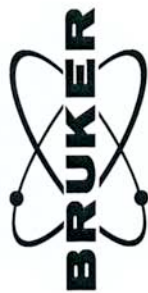

Current Data Parameters  
 NAME 644-f-1  
 EXPNO 2  
 PROCNO 1

F2 - Acquisition Parameters

Date\_ 20100412  
 Time 10.50  
 INSTRUM spect  
 PROHD 5 mm QNP 1H/13  
 PULPROG zgpg30  
 TD 65536  
 SOLVENT CDCl3  
 NS 1415  
 DS 4  
 SWH 23980.814 Hz  
 FIDRES 0.365918 Hz  
 AQ 1.3664756 sec  
 RG 1824.6  
 DW 20.850 usec  
 DE 6.00 usec  
 TE 294.2 K  
 D1 2.00000000 sec  
 d11 0.03000000 sec  
 DELTA 1.89999998 sec  
 TD0 1

===== CHANNEL f1 =====  
 NUC1 13C  
 P1 9.38 usec  
 PL1 0.00 dB  
 SFO1 100.6228298 MHz

===== CHANNEL f2 =====  
 CPDPRG2 waltz16  
 NUC2 1H  
 P2 90.00 usec  
 PL2 0.00 dB  
 PL12 16.10 dB  
 PL13 19.00 dB  
 SFO2 400.1316005 MHz

F2 - Processing parameters  
 SI 32768  
 SF 100.6127690 MHz  
 WDW EM  
 SSB 0  
 LB 1.00 Hz  
 GB 0  
 PC 1.40

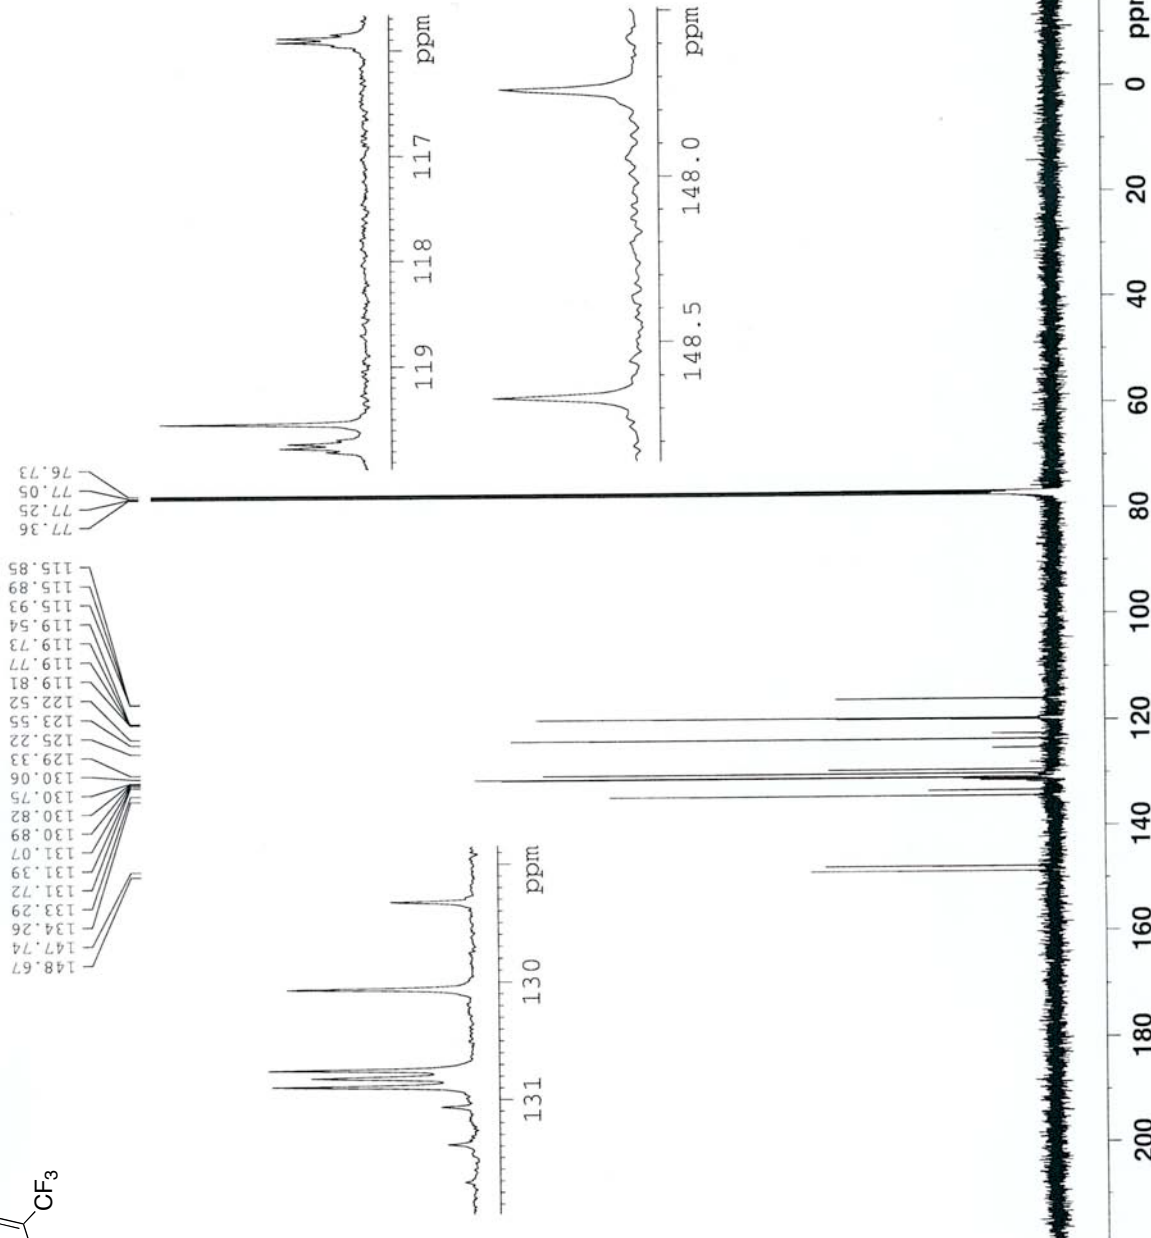

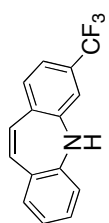

SI-47

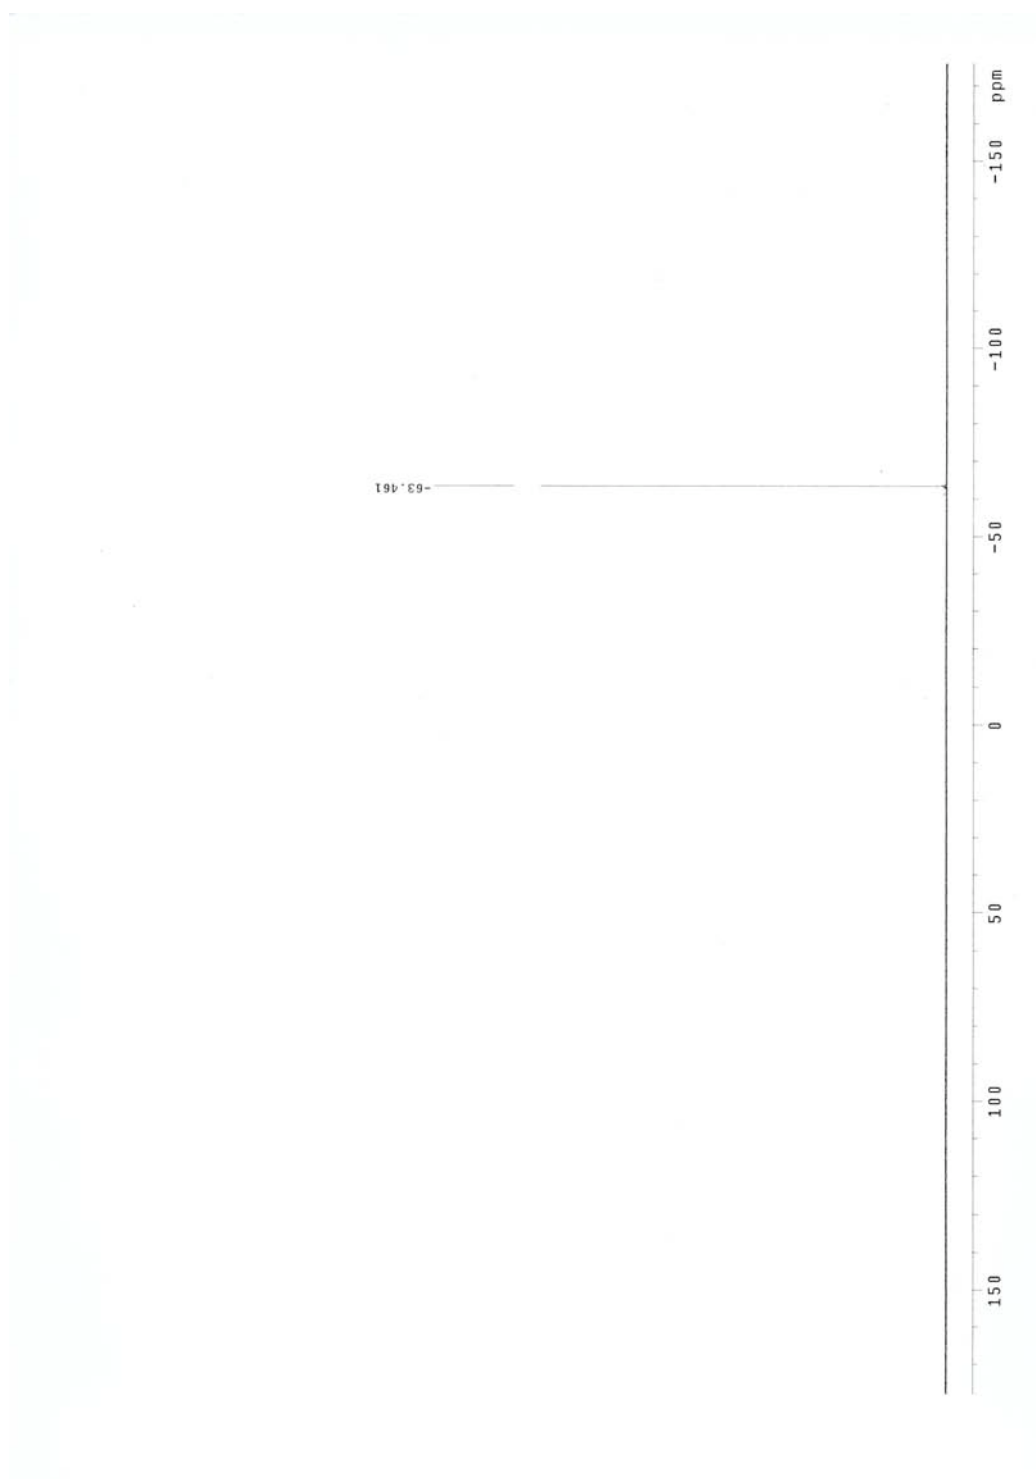

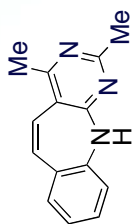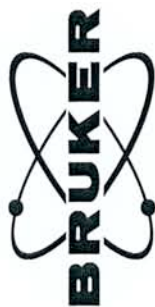

Current Data Parameters  
 NAME 559  
 EXPNO 1  
 PROCNO 1

F2 - Acquisition Parameters  
 Date\_ 20091217  
 Time 17.20  
 INSTRUM spect  
 PROBHD 5 mm QNP 1H/13  
 PULPROG zg30  
 TD 65536  
 SOLVENT CDC13  
 NS 16  
 DS 2  
 SMH 8278.146 Hz  
 FIDRES 0.126314 Hz  
 AQ 3.9584243 sec  
 RG 512  
 DW 60.400 usec  
 DE 6.00 usec  
 TE 292.2 K  
 D1 1.00000000 sec  
 TD0 1

===== CHANNEL f1 =====  
 NUC1 1H  
 P1 14.00 usec  
 PL1 0.00 dB  
 SFO1 400.1324710 MHz

F2 - Processing parameters  
 SI 65536  
 SF 400.1300220 MHz  
 WDW EM  
 SSB 0  
 LB 0.30 Hz  
 GB 0  
 PC 1.00

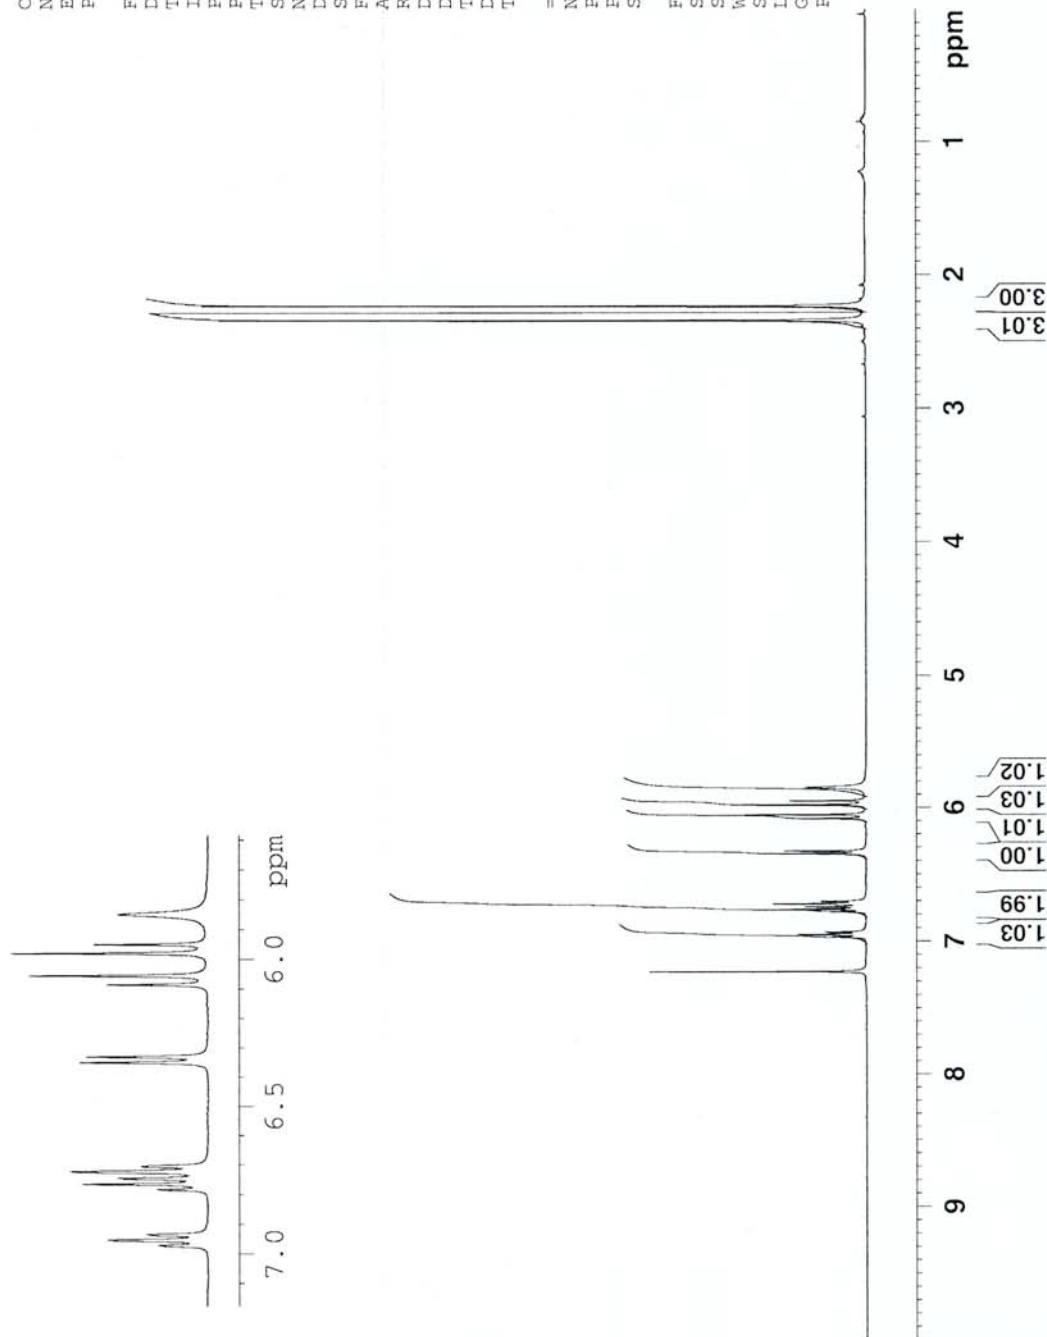

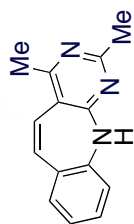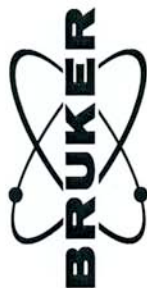

Current Data Parameters  
 NAME 3N  
 EXPNO 2  
 PROCNO 1

F2 - Acquisition Parameters  
 Date\_ 20100406  
 Time 9.58  
 INSTRUM spect  
 PROBHD 5 mm QNP 1H/13  
 PULPROG zgpg30  
 TD 65536  
 SOLVENT CDCl3  
 NS 576  
 DS 4  
 SWH 23980.814 Hz  
 FIDRES 0.365918 Hz  
 AQ 1.3664756 sec  
 RG 11585.2  
 DW 20.850 usec  
 DE 6.00 usec  
 TE 294.2 K  
 D1 2.00000000 sec  
 g11 0.03000000 sec  
 DELTA 1.89999998 sec  
 TD0 1

===== CHANNEL f1 =====  
 NUC1 13C  
 P1 9.38 usec  
 PL1 0.00 dB  
 SFO1 100.6228298 MHz

===== CHANNEL f2 =====  
 CPDPRG2 waltz16  
 NUC2 1H  
 PCPD2 90.00 usec  
 PL2 0.00 dB  
 PL12 16.10 dB  
 PL13 19.00 dB  
 SFO2 400.1316005 MHz

F2 - Processing parameters  
 SI 32768  
 SF 100.6127690 MHz  
 WDW EM  
 SSB 0  
 LB 1.00 Hz  
 GB 0  
 PC 1.40

21.90  
25.17

76.73  
77.05  
77.36

115.00  
119.65  
123.85  
125.31  
128.14  
130.20  
131.31  
133.01  
144.10

166.36  
166.28  
164.14

ppm

ppm

167

ppm

120

125

130

145

160

200

ppm

20

40

60

80

100

120

140

160

180

200

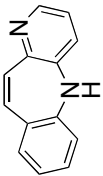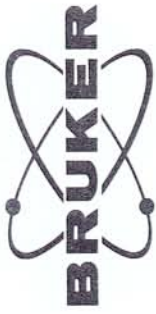

Current Data Parameters  
 NAME 644-C--1  
 EXPNO 1  
 PROCNO 1

F2 - Acquisition Parameters  
 Date\_ 20100412  
 Time 9.12  
 INSTRUM spect  
 PROBHD 5 mm QNP 1H/13  
 PULPROG zg30  
 TD 65536  
 SOLVENT CDCl3  
 NS 77  
 DS 2  
 SMH 8278.146 Hz  
 FIDRES 0.126314 Hz  
 AQ 3.9584243 sec  
 RG 362  
 DW 60.400 usec  
 DE 6.00 usec  
 TE 294.2 K  
 D1 1.00000000 sec  
 TD0 1

==== CHANNEL f1 =====  
 NUC1 1H  
 P1 14.00 usec  
 PL1 0.00 dB  
 SFO1 400.1324710 MHz

F2 - Processing parameters  
 SI 65536  
 SF 400.1300220 MHz  
 WDW EM  
 SSB 0  
 LB 0.30 Hz  
 GB 0  
 PC 1.00

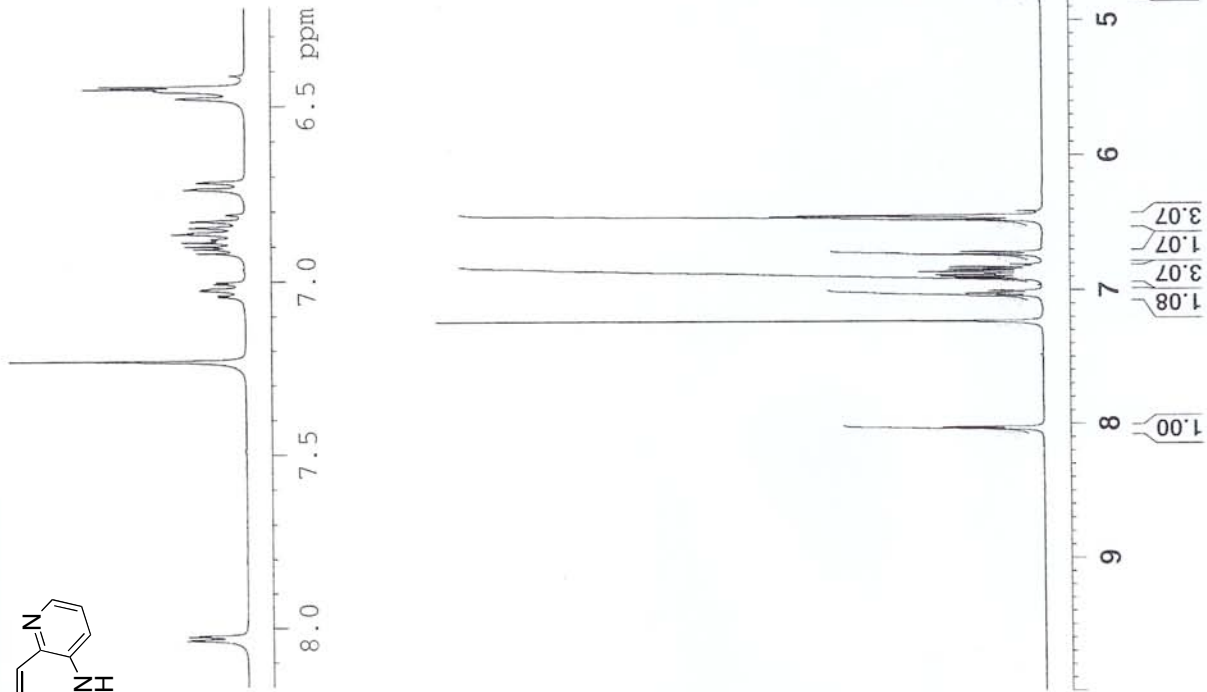

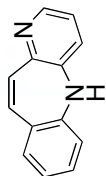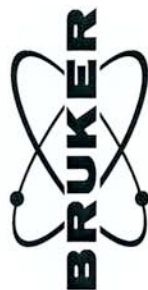

Current Data Parameters  
 NAME 644-C  
 EXPNO 2  
 PROCNO 1

F2 - Acquisition Parameters  
 Date\_ 20100408  
 Time 11.37  
 INSTRUM spect  
 PROBD 5 mm QNP 1H/13  
 PULPROG zgpg30  
 TD 65536  
 SOLVENT CDCl3  
 NS 345  
 DS 4  
 SWH 23980.814 Hz  
 FIDRES 0.365918 Hz  
 AQ 1.3664756 sec  
 RG 1824.6  
 DW 20.850 usec  
 DE 6.00 usec  
 TE 294.2 K  
 D1 2.00000000 sec  
 d11 0.03000000 sec  
 DELTA 1.89999998 sec  
 TD0 1

===== CHANNEL f1 =====  
 NUC1 13C  
 P1 9.38 usec  
 PL1 0.00 dB  
 SFO1 100.6228298 MHz

===== CHANNEL f2 =====  
 CPDPRG2 waltz16  
 NUC2 1H  
 PCPD2 90.00 usec  
 PL2 0.00 dB  
 PL12 16.10 dB  
 PL13 19.00 dB  
 SFO2 400.1316005 MHz

F2 - Processing parameters  
 SI 32768  
 SF 100.6127690 MHz  
 EM 0  
 WDW 0  
 SSB 1.00 Hz  
 LB 0  
 GB 0  
 PC 1.40

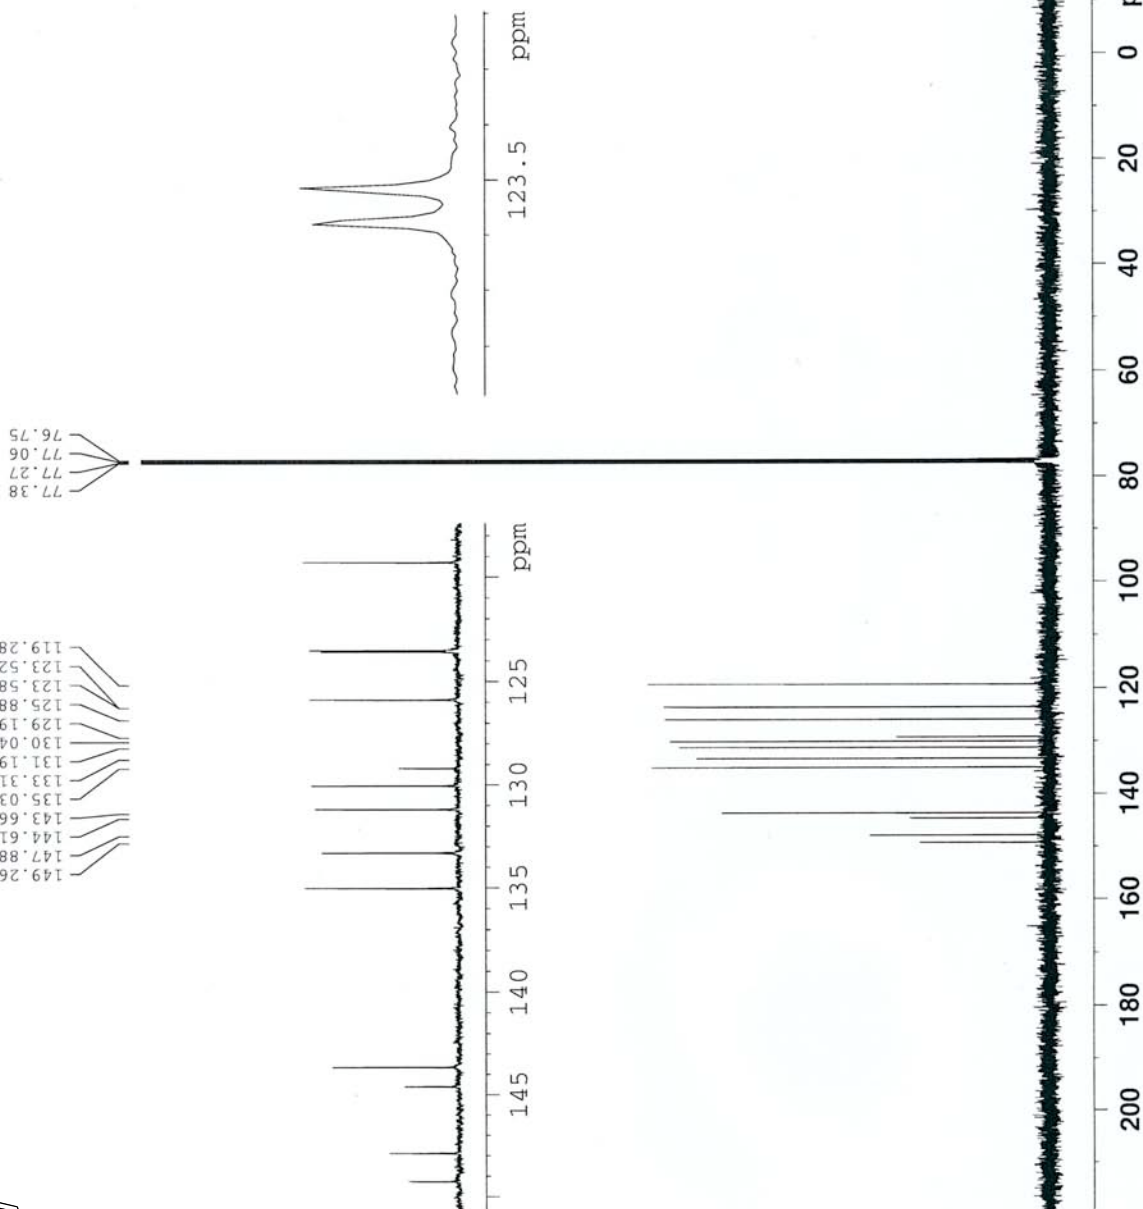

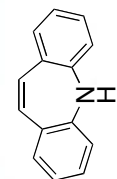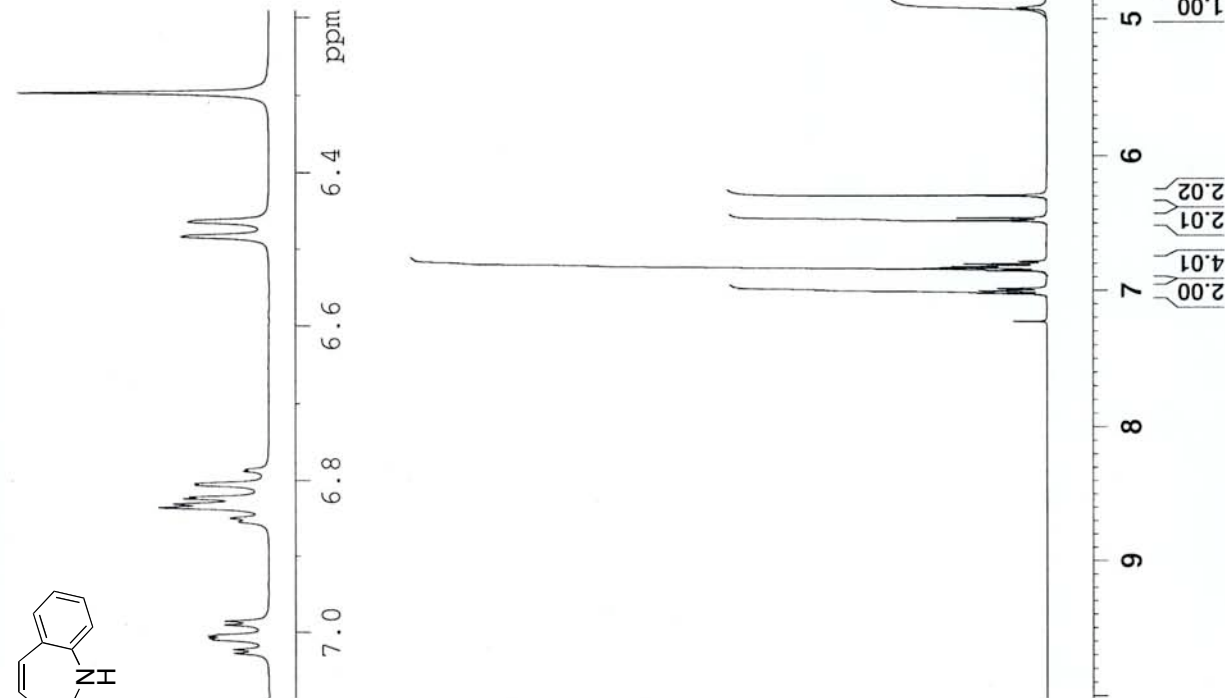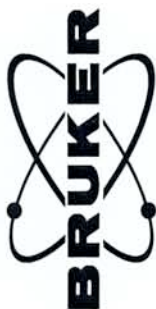

Current Data Parameters  
 NAME Dibenzazepine-1  
 EXPNO 1  
 PROCNO 1

F2 - Acquisition Parameters  
 Date\_ 20100330  
 Time 8.16  
 INSTRUM spect  
 PROBHD 5 mm QNP 1H/13  
 PULPROG zg30  
 TD 65536  
 SOLVENT CDCl3  
 NS 11  
 DS 2  
 SWH 8278.146 Hz  
 FIDRES 0.126314 Hz  
 AQ 3.9584243 sec  
 RG 322.5  
 DW 60.400 usec  
 DE 6.00 usec  
 TE 294.2 K  
 D1 1.00000000 sec  
 TD0 1

===== CHANNEL f1 =====  
 NUC1 1H  
 P1 14.00 usec  
 PL1 0.00 dB  
 SFO1 400.1324710 MHz

F2 - Processing parameters  
 SI 65536  
 SF 400.1300220 MHz  
 WDW EM  
 SSB 0  
 LB 0.30 Hz  
 GB 0  
 PC 1.00

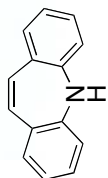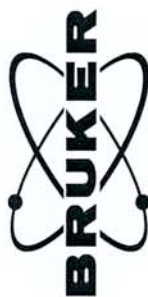

Current Data Parameters  
 NAME Dibenazepine-1  
 EXPNO 2  
 PROCNO 1

F2 - Acquisition Parameters  
 Date\_ 20100330  
 Time 8.27  
 INSTRUM spect  
 PROBHD 5 mm QNP 1H/13  
 PULPROG zgpg30  
 TD 65536  
 SOLVENT CDCl3  
 NS 85  
 DS 4  
 SWH 23980.814 Hz  
 FIDRES 0.365918 Hz  
 AQ 1.3664756 sec  
 RG 1824.6  
 DW 20.850 usec  
 DE 6.00 usec  
 TE 294.2 K  
 D1 2.00000000 sec  
 d11 0.03000000 sec  
 DELTA 1.89999998 sec  
 TD0 1

==== CHANNEL f1 =====  
 NUC1 13C  
 P1 9.38 usec  
 PL1 0.00 dB  
 SF01 100.6228298 MHz

==== CHANNEL f2 =====  
 CPDPRG2 waltz16  
 NUC2 1H  
 PCPD2 90.00 usec  
 PL2 0.00 dB  
 PL12 16.10 dB  
 PL13 19.00 dB  
 SF02 400.1316005 MHz

F2 - Processing parameters  
 SI 32768  
 SF 100.6127690 MHz  
 WDW EM  
 SSB 0  
 LB 1.00 Hz  
 GB 0  
 PC 1.40

77.39  
 77.07  
 76.75

148.39  
 132.16  
 130.53  
 129.77  
 129.49  
 123.06  
 119.36

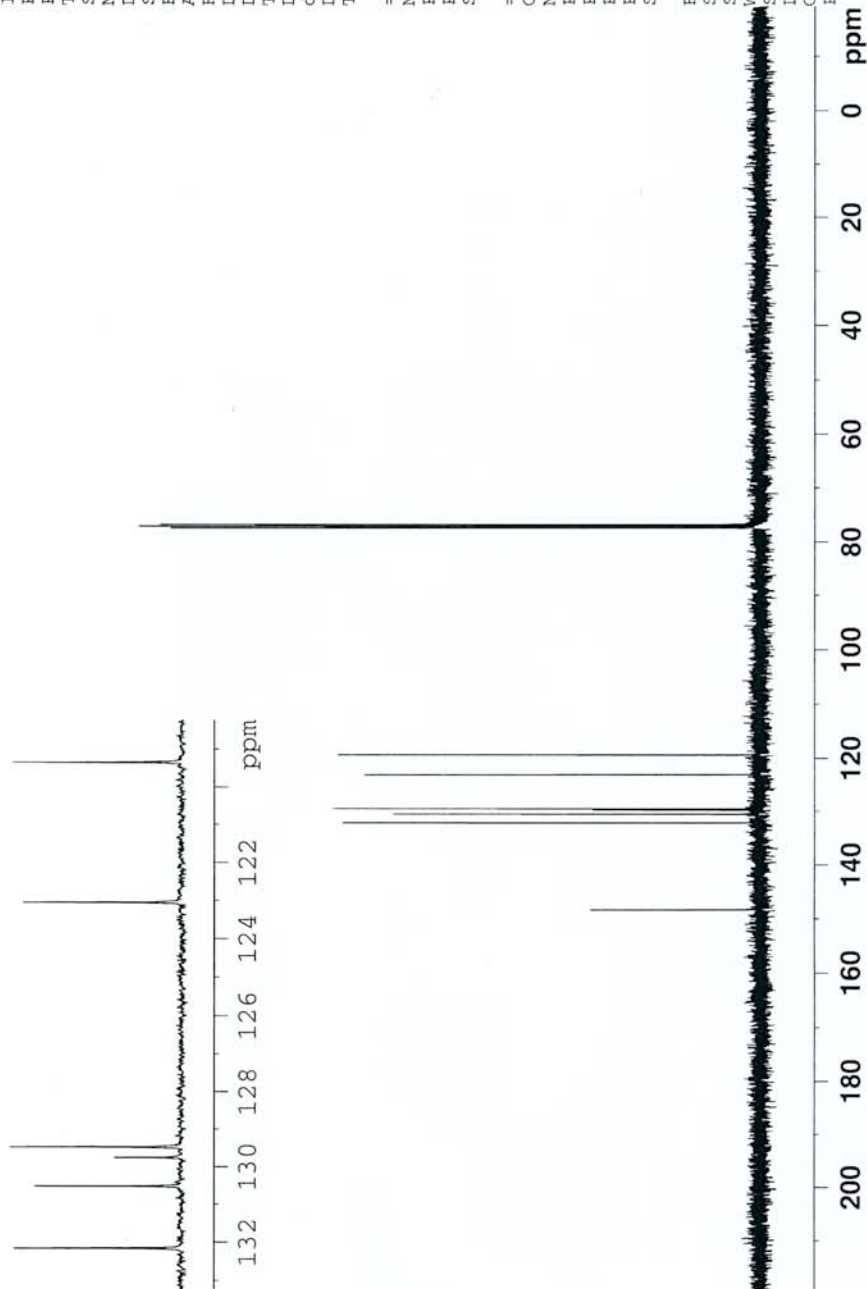

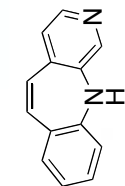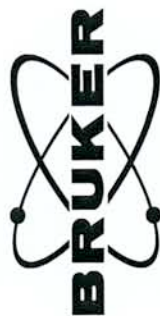

Current Data Parameters  
 NAME 517-2  
 EXPNO 1  
 PROCNO 1

F2 - Acquisition Parameters  
 Date\_ 20100320  
 Time 9.54  
 INSTRUM spect  
 PROBHD 5 mm QNP 1H/13  
 PULPROG zg30  
 TD 65536  
 SOLVENT CDCl3  
 NS 16  
 DS 2  
 SWH 8278.146 Hz  
 FIDRES 0.126314 Hz  
 AQ 3.9584243 sec  
 RG 57  
 DW 60.400 usec  
 DE 6.00 usec  
 TE 293.2 K  
 D1 1.00000000 sec  
 TD0 1

===== CHANNEL f1 =====  
 NUC1 1H  
 P1 14.00 usec  
 PL1 0.00 dB  
 SFO1 400.1324710 MHz

F2 - Processing parameters  
 SI 65536  
 SF 400.1300220 MHz  
 WDW EM  
 SSB 0  
 LB 0.30 Hz  
 GB 0  
 PC 1.00

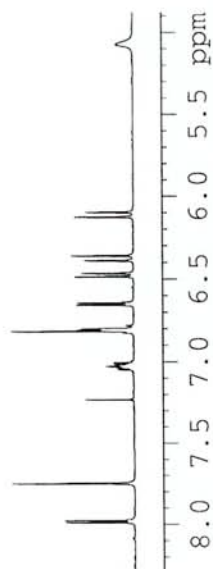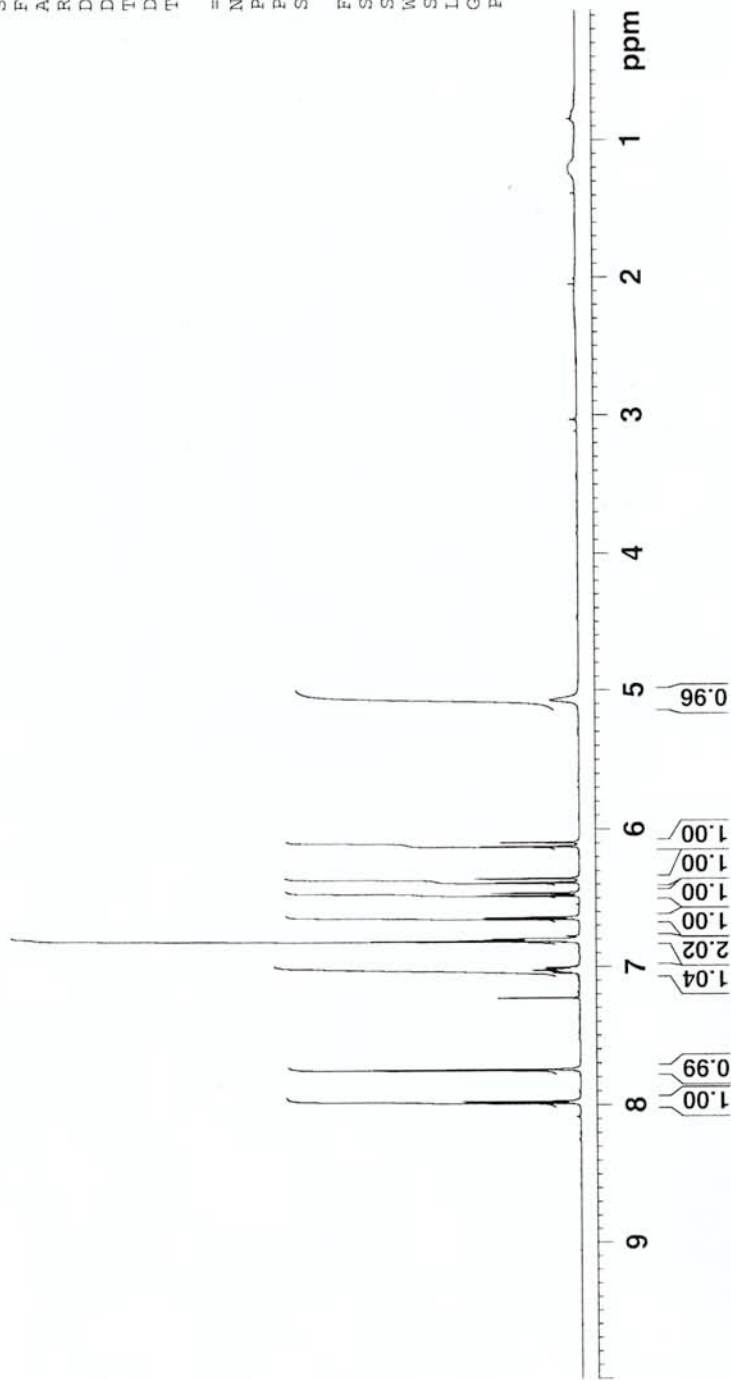

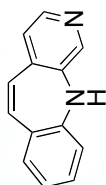

148.38  
144.75  
144.01  
140.02  
137.00  
136.88  
131.43  
130.50  
129.57  
128.90  
123.52  
123.38  
119.60

77.37  
77.06  
76.74

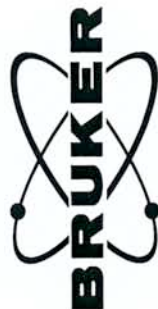

Current Data Parameters  
NAME 517-1  
EXPNO 1  
PROCNO 1

F2 - Acquisition Parameters  
Date\_ 20100320  
Time 9.50  
INSTRUM spect  
PROBHD 5 mm QNP 1H/13  
PULPROG zgpg30  
TD 65536  
SOLVENT CDCl3  
NS 119  
DS 4  
SWH 23980.814 Hz  
FIDRES 0.365918 Hz  
AQ 1.3664756 sec  
RG 2580.3  
DW 20.850 usec  
DE 6.00 usec  
TE 294.2 K  
D1 2.0000000 sec  
d11 0.0300000 sec  
DELTA 1.89999998 sec  
TD0 1

===== CHANNEL f1 =====  
NUC1 13C  
P1 9.38 usec  
PL1 0.00 dB  
SFO1 100.6228298 MHz

===== CHANNEL f2 =====  
CPDPRG2 waltz16  
NUC2 1H  
PCPD2 90.00 usec  
PL2 0.00 dB  
PL12 16.10 dB  
PL13 19.00 dB  
SFO2 400.1316005 MHz

F2 - Processing parameters  
SI 32768  
SF 100.6127690 MHz  
WDW EM  
SSB 0  
LB 1.00 Hz  
GB 0  
PC 3.00

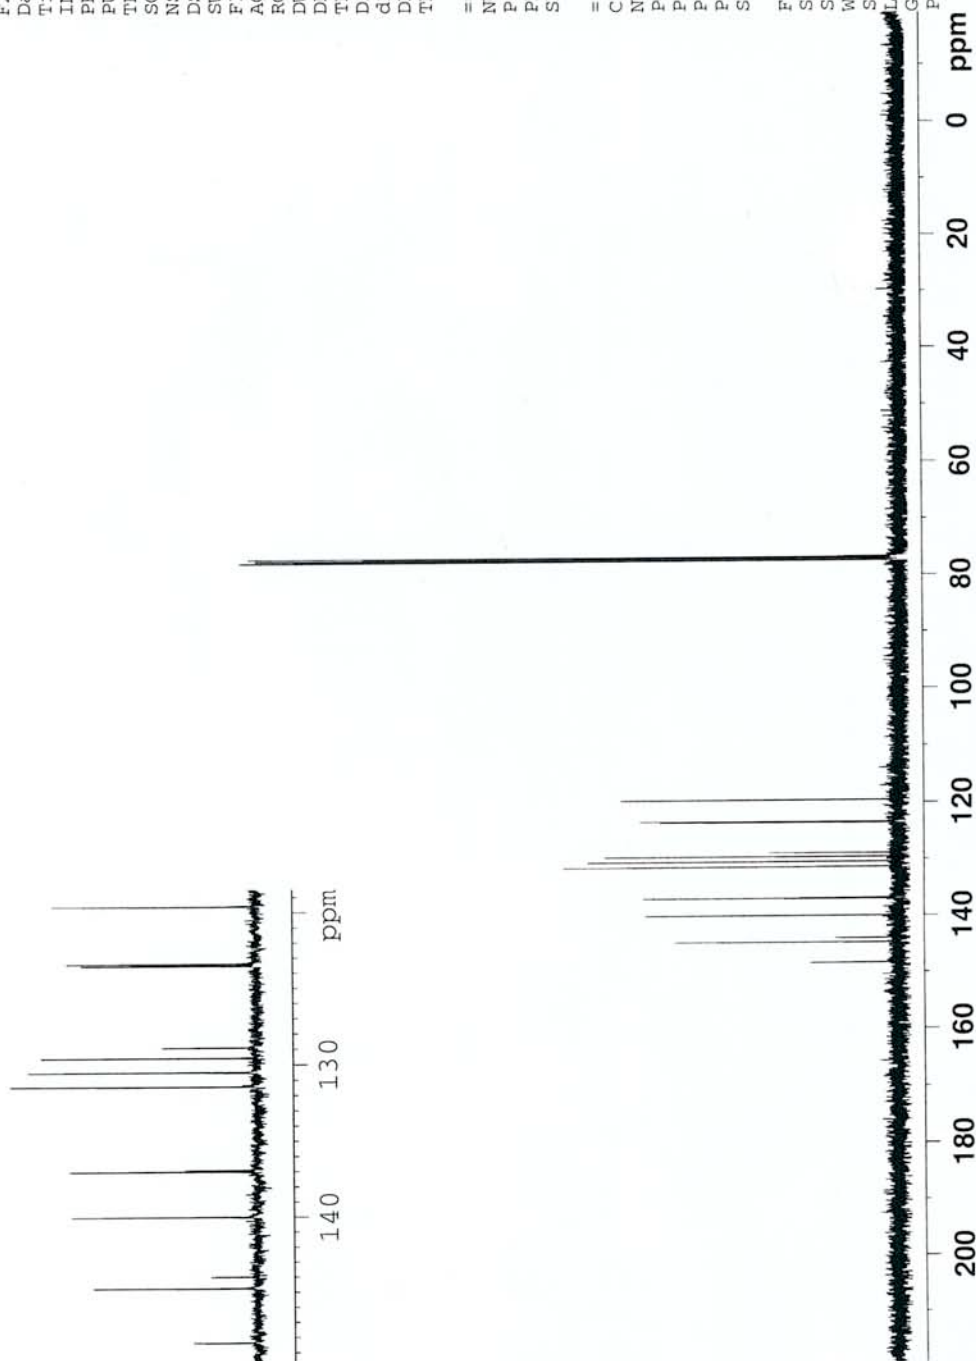

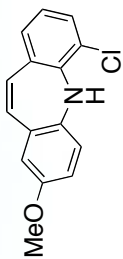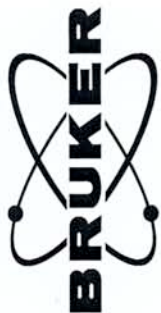

Current Data Parameters  
 NAME 635  
 EXPNO 1  
 PROCNO 1

F2 - Acquisition Parameters  
 Date\_ 20100302  
 Time 8.52  
 INSTRUM spect  
 PROBHD 5 mm QNP 1H/13  
 PULPROG zg30  
 TD 65536  
 SOLVENT CDCl3  
 NS 16  
 DS 2  
 SWH 8278.146 Hz  
 FIDRES 0.126314 Hz  
 AQ 3.9584243 sec  
 RG 228.1  
 DW 60.400 usec  
 DE 6.00 usec  
 TE 294.2 K  
 D1 1.00000000 sec  
 TDO 1

===== CHANNEL f1 =====  
 NUC1 1H  
 P1 14.00 usec  
 PL1 0.00 dB  
 SFO1 400.1324710 MHz

F2 - Processing parameters  
 SI 65536  
 SF 400.1300175 MHz  
 WDW EM  
 SSB 0  
 LB 0.30 Hz  
 GB 0  
 PC 1.00

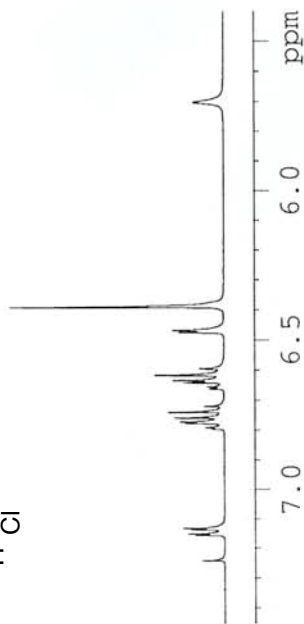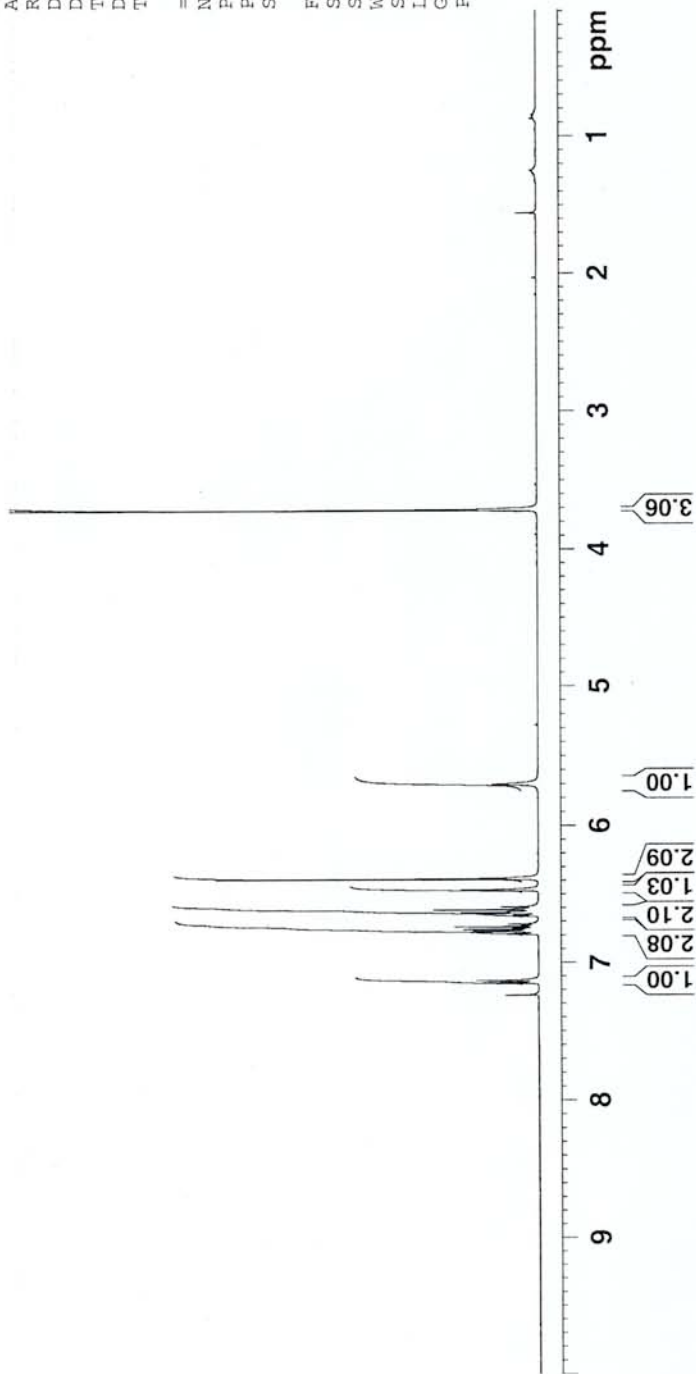

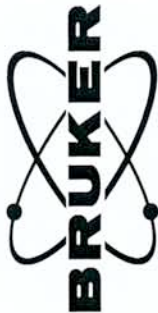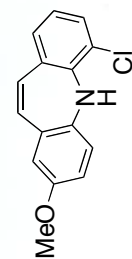

156.12  
144.86  
140.46  
132.54  
132.18  
131.36  
130.98  
129.09  
129.02  
123.38  
122.97  
121.49  
115.32  
114.67

77.37  
77.05  
76.73

55.57

Current Data Parameters  
NAME 635  
EXPNO 2  
PROCNO 1

F2 - Acquisition Parameters  
Date\_ 20100302  
Time 9.06  
INSTRUM spect  
PROBHD 5 mm QNP 1H/13  
PULPROG zgpg30  
TD 65536  
SOLVENT CDCl3  
NS 118  
DS 4  
SWH 23980.814 Hz  
FIDRES 0.365918 Hz  
AQ 1.3664756 sec  
RG 1824.6  
DW 20.850 usec  
DE 6.00 usec  
TE 295.2 K  
D1 2.00000000 sec  
d11 0.03000000 sec  
DELTA 1.89999998 sec  
TD0 1

==== CHANNEL f1 =====  
NUC1 13C  
P1 9.38 usec  
PL1 0.00 dB  
SFO1 100.6228298 MHz

==== CHANNEL f2 =====  
CPDPRG2 waltz16  
NUC2 1H  
PCPD2 90.00 usec  
PL2 0.00 dB  
PL12 16.10 dB  
PL13 19.00 dB  
SFO2 400.1316005 MHz

F2 - Processing parameters  
SI 32768  
SF 100.6127690 MHz  
WDW EM  
SSB 0  
LB 1.00 Hz  
GB 0  
PC 1.40

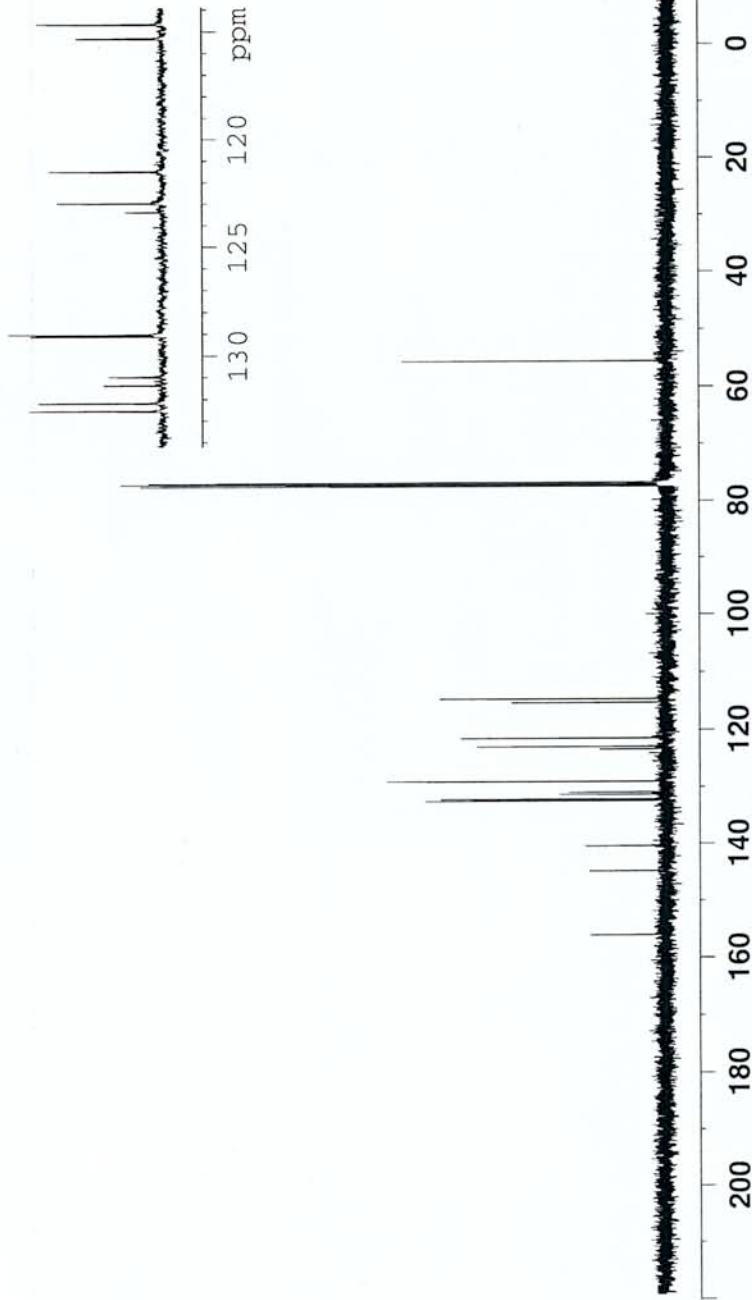

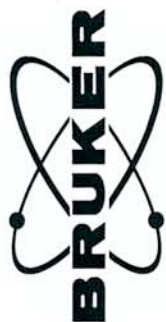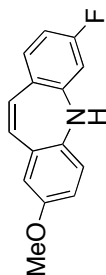

Current Data Parameters  
NAME 617  
EXPNO 1  
PROCNO 1

F2 - Acquisition Parameters  
Date\_ 20100224  
Time 9.04  
INSTRUM spect  
PROBHD 5 mm QNP 1H/13  
PULPROG zg30  
TD 65536  
SOLVENT CDCl3  
NS 16  
DS 2  
SMH 8278.146 Hz  
FIDRES 0.126314 Hz  
AQ 3.9584243 sec  
RG 322.5  
DW 60.400 usec  
DE 6.00 usec  
TE 294.2 K  
D1 1.00000000 sec  
TD0 1

===== CHANNEL f1 =====  
NUC1 1H  
P1 14.00 usec  
PL1 0.00 dB  
SFO1 400.1324710 MHz

F2 - Processing parameters  
SI 65536  
SF 400.1300220 MHz  
WDW EM  
SSB 0  
LB 0.30 Hz  
GB 0  
PC 1.00

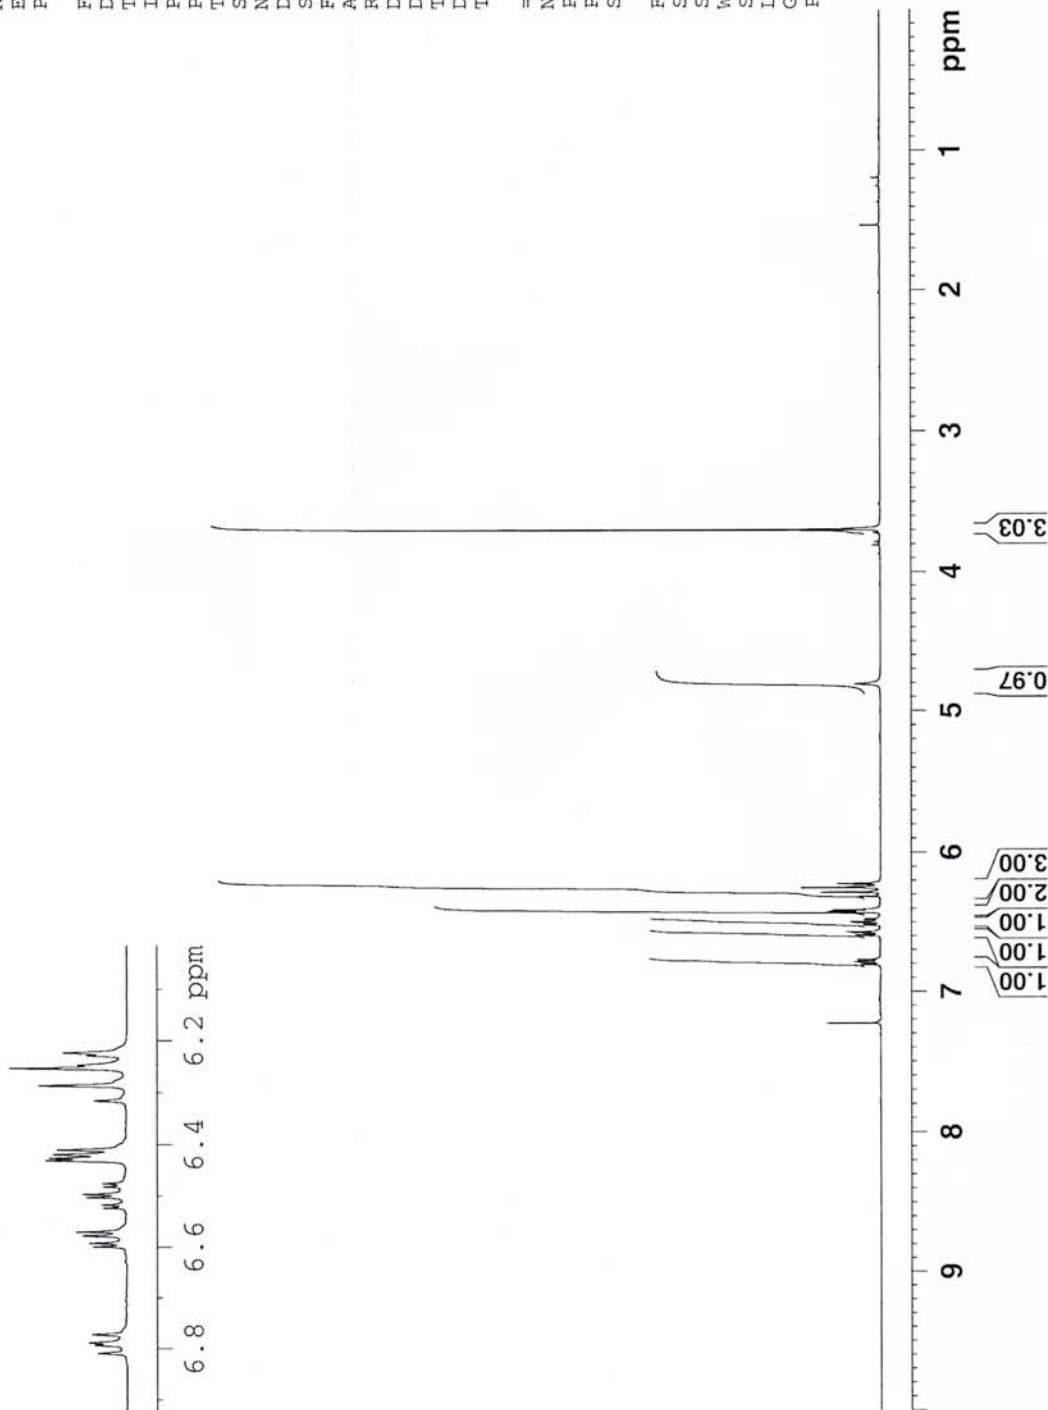

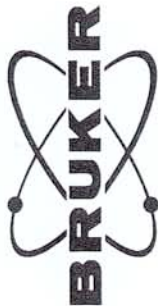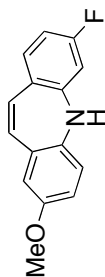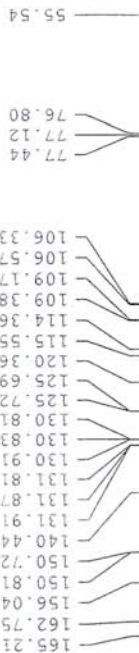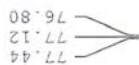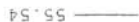

Current Data Parameters  
NAME 642-b 5  
EXPNO 1  
PROCNO 1

# F2 - Acquisition Parameters

Date\_ 20100406  
Time 19.32  
INSTRUM spect  
PROBHD 5 mm QNP 1H/13  
PULPROG zgpg30  
TD 65536  
SOLVENT CDCl3  
NS 113  
DS 4  
SWH 23980.814 Hz  
FIDRES 0.365918 Hz  
AQ 1.3664756 sec  
RG 1824.6  
DE 20.850 usec  
TE 294.2 K  
D1 2.00000000 sec  
d11 0.03000000 sec  
DELTA 1.89999998 sec  
TDO 1

==== CHANNEL f1 =====  
NUC1 13C  
P1 9.38 usec  
PL1 0.00 dB  
SFO1 100.6228298 MHz

==== CHANNEL f2 =====  
CPDPRG2 waltz16  
NUC2 1H  
PCPD2 90.00 usec  
PL2 0.00 dB  
PL12 16.10 dB  
PL13 19.00 dB  
SFO2 400.1316005 MHz

F2 - Processing parameters  
SI 32768  
SF 100.6127690 MHz  
WDW EM  
SSB 0  
LB 1.00 Hz  
GB 0  
PC 3.00

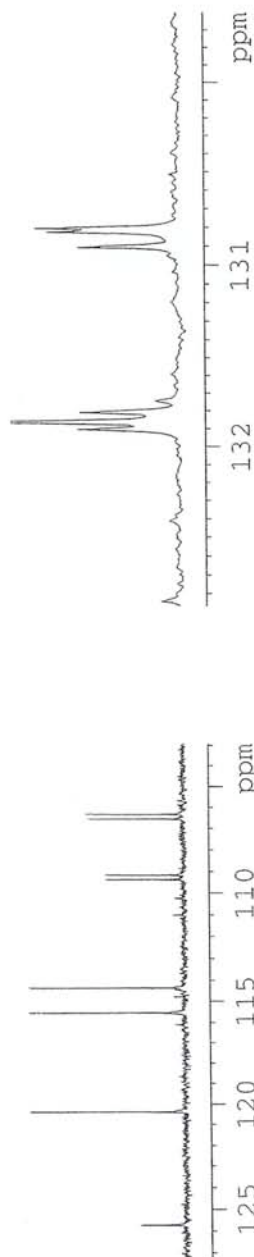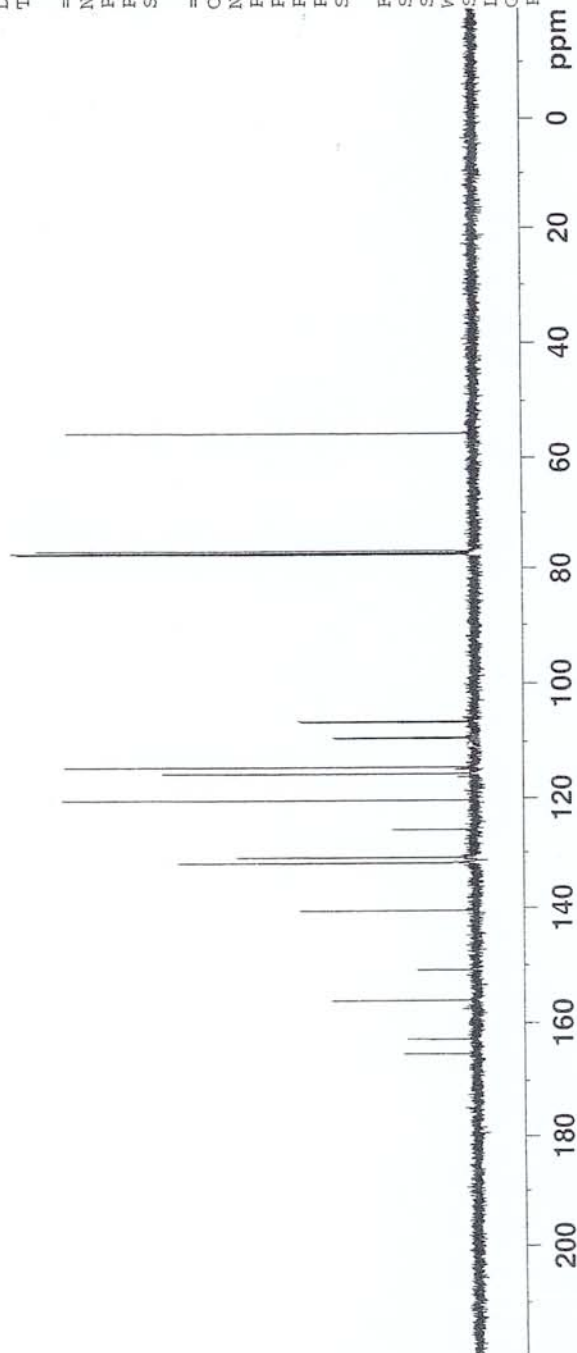

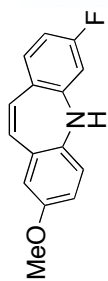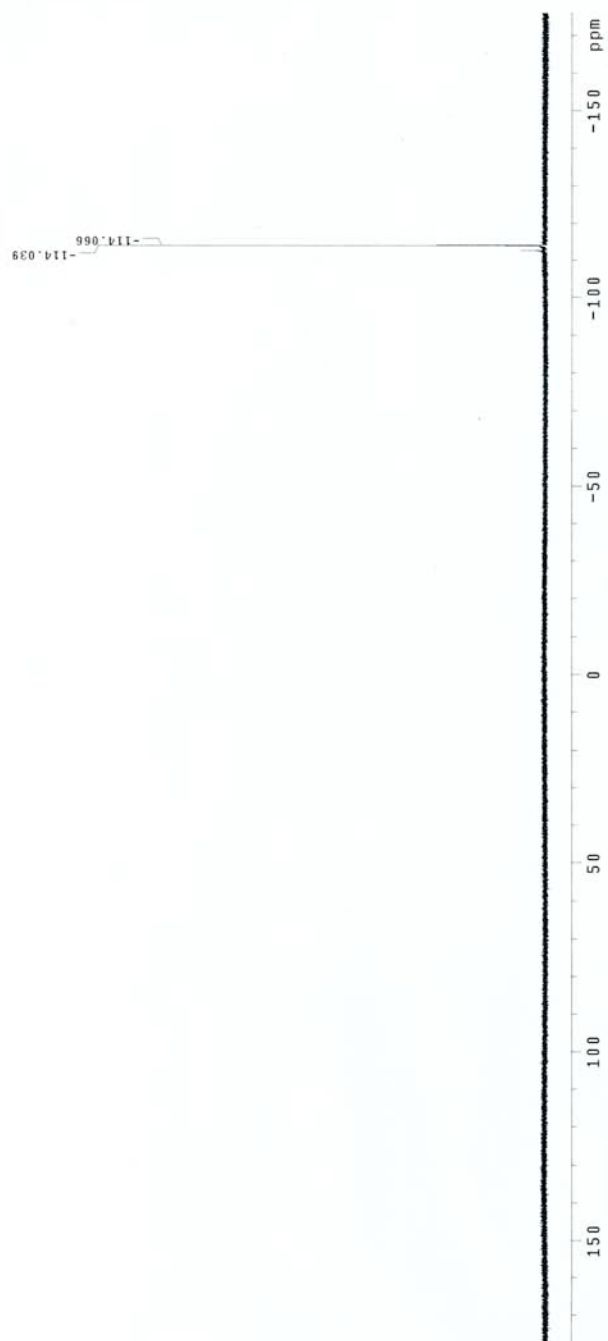

27-6426

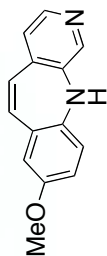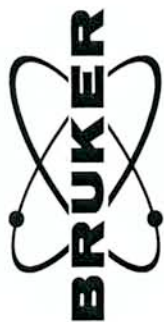

Current Data Parameters  
 NAME 618  
 EXPNO 1  
 PROCNO 1

F2 - Acquisition Parameters  
 Date\_ 20100208  
 Time 14.17  
 INSTRUM spect  
 PROBHD 5 mm QNP 1H/13  
 PULPROG zg30  
 TD 65536  
 SOLVENT CDC13  
 NS 8  
 DS 2  
 SWH 8278.146 Hz  
 FIDRES 0.126314 Hz  
 AQ 3.9584243 sec  
 RG 362  
 DW 60.400 usec  
 DE 6.00 usec  
 TE 292.2 K  
 D1 1.00000000 sec  
 TD0 1

===== CHANNEL f1 =====  
 NUC1 1H  
 P1 14.00 usec  
 PL1 0.00 dB  
 SFO1 400.1324710 MHz

F2 - Processing parameters  
 SI 65536  
 SF 400.1300174 MHz  
 WDW EM  
 SSB 0  
 LB 0.30 Hz  
 GB 0  
 PC 1.00

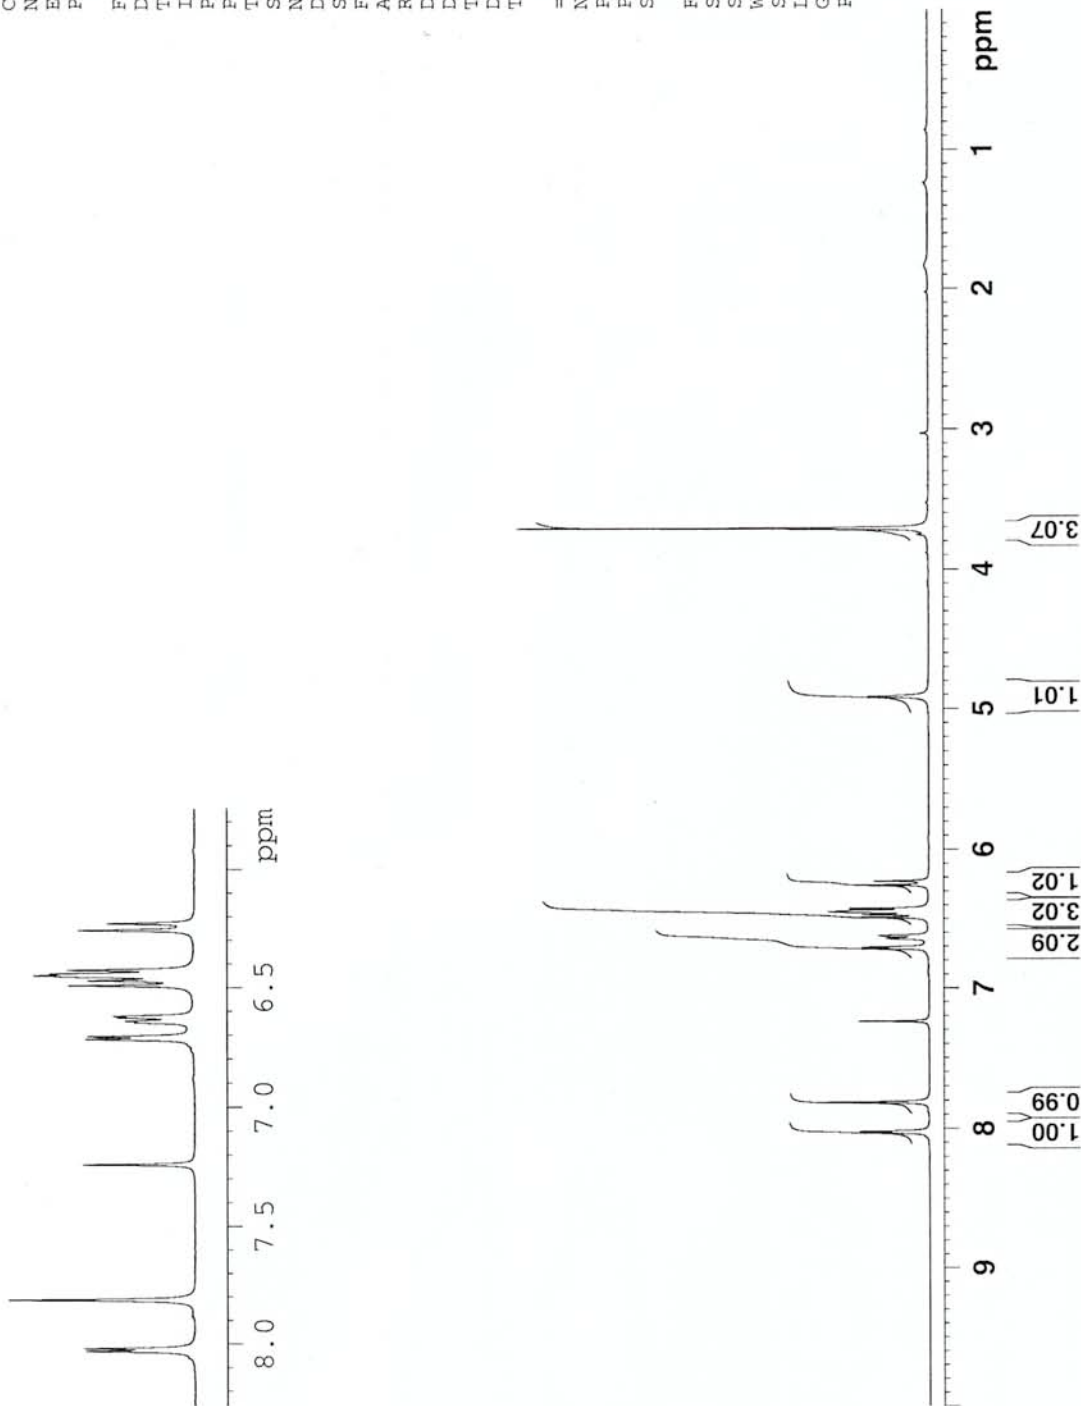

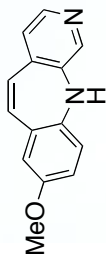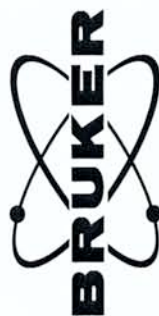

Current Data Parameters  
 NAME 642 d  
 EXPNO 2  
 PROCNO 1

F2 - Acquisition Parameters  
 Date\_ 20100405  
 Time 16.12  
 INSTRUM spect  
 PROBHD 5 mm QNP 1H/13  
 PULPROG zgpg30  
 TD 65536  
 SOLVENT CDCl3  
 NS 188  
 DS 4  
 SWH 23980.814 Hz  
 FIDRES 0.365918 Hz  
 AQ 1.3664756 sec  
 RG 1824.6  
 DW 20.850 usec  
 DE 6.00 usec  
 TE 294.2 K  
 D1 2.00000000 sec  
 d11 0.03000000 sec  
 DELTA 1.89999998 sec  
 TD0 1

===== CHANNEL f1 =====  
 NUC1 13C  
 P1 9.38 usec  
 PL1 0.00 dB  
 SFO1 100.6228298 MHz

===== CHANNEL f2 =====  
 CPDPRG2 waltz16  
 NUC2 1H  
 PCPD2 90.00 usec  
 PL2 0.00 dB  
 PL12 16.10 dB  
 PL13 19.00 dB  
 SFO2 400.1316005 MHz

F2 - Processing parameters  
 SI 32768  
 SF 100.6127690 MHz  
 EM 0  
 SSB 1.00 Hz  
 LB 0  
 GB 0  
 PC 1.40

77.40  
 77.08  
 76.76  
 55.58

155.98  
 144.58  
 141.27  
 140.08  
 136.68  
 136.47  
 130.27  
 130.12  
 123.51  
 120.54  
 116.43  
 115.21

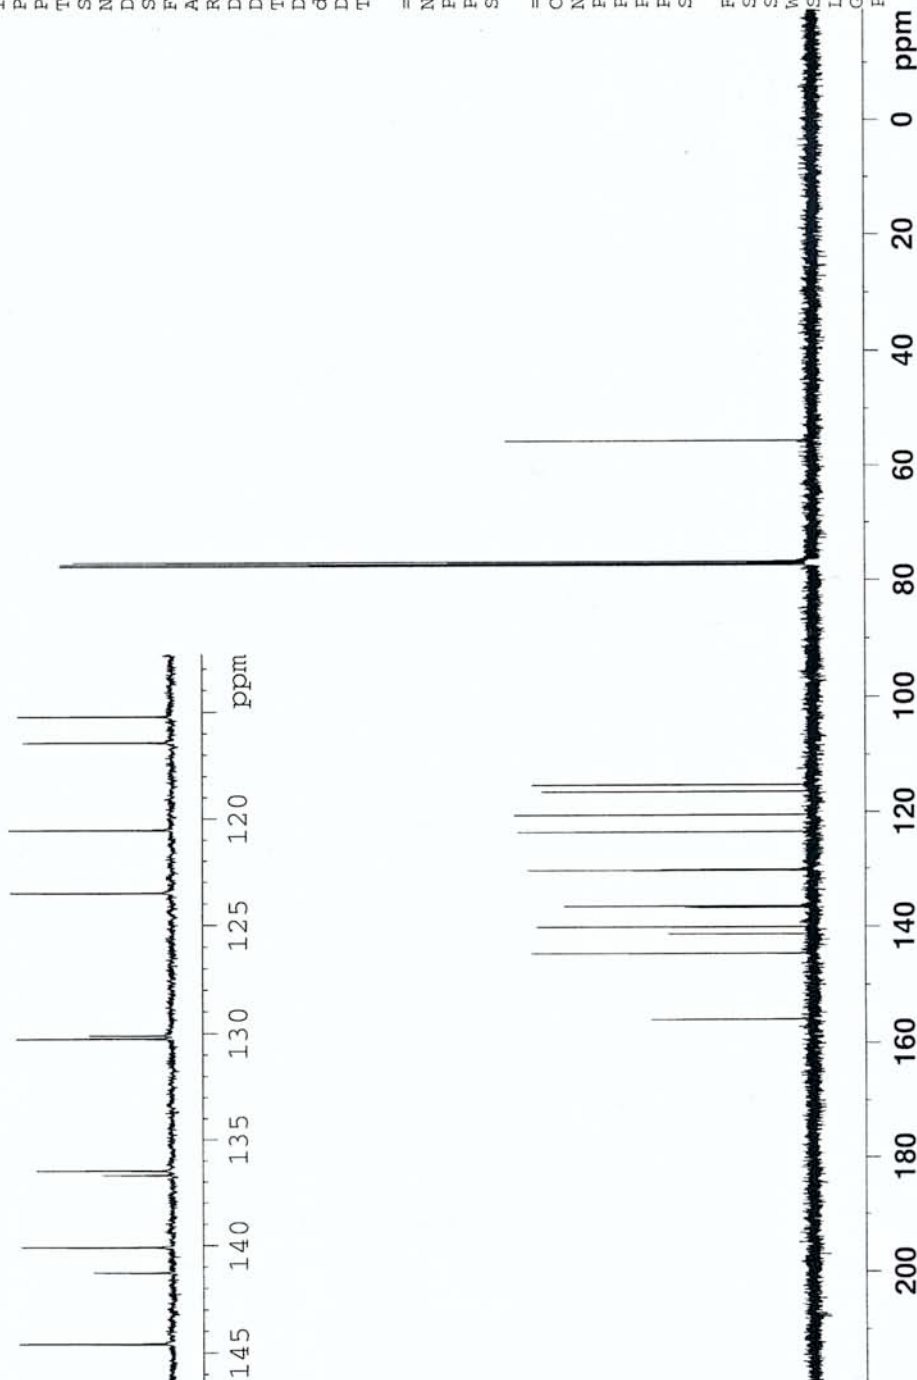

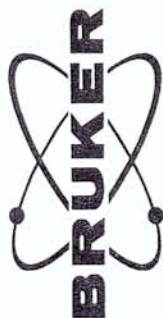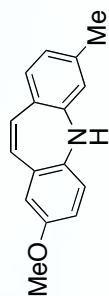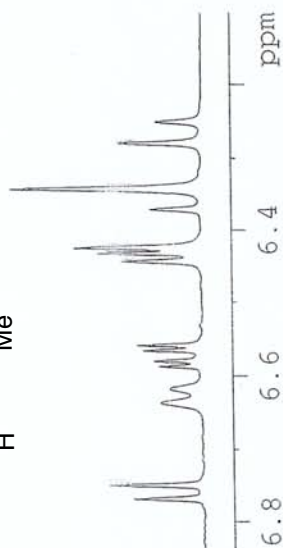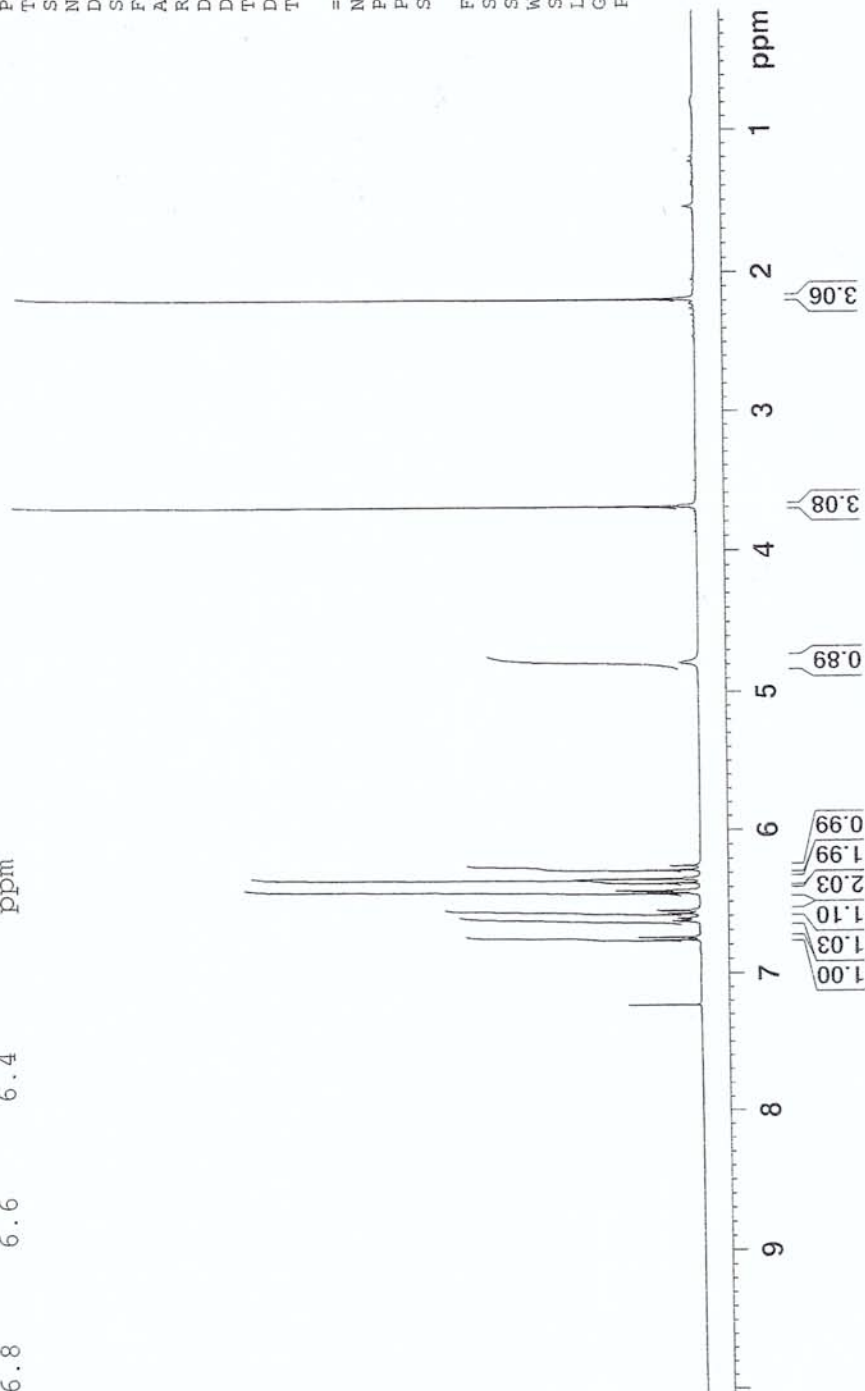

Current Data Parameters  
NAME 616-1  
EXPNO 1  
PROCNO 1

F2 - Acquisition Parameters  
Date\_ 20100320  
Time 10.30  
INSTRUM spect  
PROBHD 5 mm QNP 1H/13  
PULPROG zg30  
TD 65536  
SOLVENT CDCl3  
NS 16  
DS 2  
SWH 8278.146 Hz  
FIDRES 0.126314 Hz  
AQ 3.9584243 sec  
RG 287.4  
DW 60.400 usec  
DE 6.00 usec  
TE 293.2 K  
D1 1.00000000 sec  
TD0 1

===== CHANNEL f1 =====  
NUC1 1H  
P1 14.00 usec  
PL1 0.00 dB  
SFO1 400.1324710 MHz

F2 - Processing parameters  
SI 65536  
SF 400.1300220 MHz  
WDW EM  
SSB 0  
LB 0.30 Hz  
GB 0  
PC 1.00

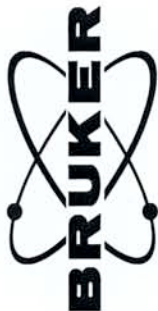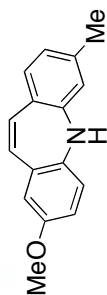

155.76  
148.91  
141.31  
139.75  
132.70  
131.09  
130.73  
130.47  
126.79  
123.59  
120.14  
120.02  
115.35  
114.26

77.37  
77.06  
76.74

55.55

20.93

F2 - Acquisition Parameters  
Date\_ 20100402  
Time 8.30  
INSTRUM spect  
PROBHD 5 mm QNP 1H/13  
PULPROG zgpg30  
TD 65536  
SOLVENT CDCl3  
NS 400  
DS 4  
SWH 23980.814 Hz  
FIDRES 0.365918 Hz  
AQ 1.3664756 sec  
RG 1625.5  
DW 20.850 usec  
DE 6.00 usec  
TE 295.2 K  
D1 2.00000000 sec  
d11 0.03000000 sec  
DELTA 1.89999998 sec  
TD0 1

===== CHANNEL f1 =====  
NUC1 13C  
P1 9.38 usec  
PL1 0.00 dB  
SFO1 100.6228298 MHz

===== CHANNEL f2 =====  
CPDPRG2 waltz16  
NUC2 1H  
PCPD2 90.00 usec  
PL2 0.00 dB  
PL12 16.10 dB  
PL13 19.00 dB  
SFO2 400.1316005 MHz

F2 - Processing parameters  
SI 32768  
SF 100.6127690 MHz  
WDW EM  
SSB 0  
LB 1.00 Hz  
GB 0  
PC 1.40

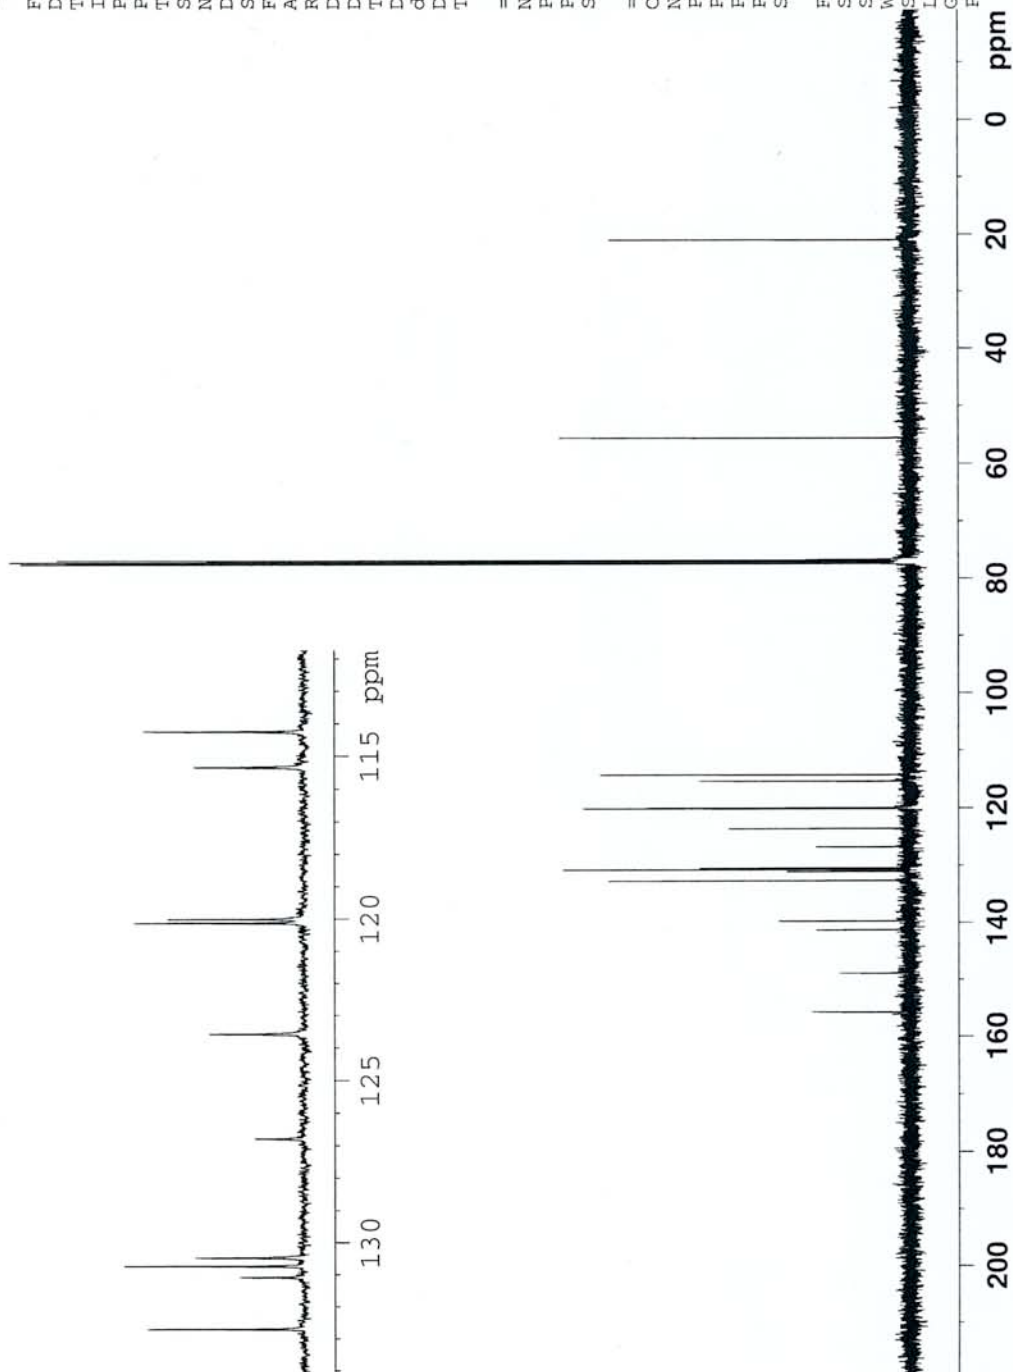

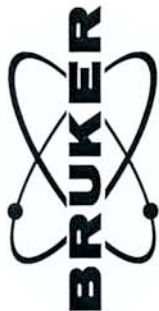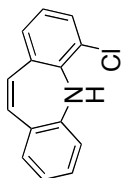

Current Data Parameters  
 NAME 553-2-2  
 EXPNO 1  
 PROCNO 1

F2 - Acquisition Parameters  
 Date\_ 20091115  
 Time 8.16  
 INSTRUM spect  
 PROBHD 5 mm QNP 1H/13  
 PULPROG zg30  
 TD 65536  
 SOLVENT CDC13  
 NS 7  
 DS 2  
 SWH 8278.146 Hz  
 FIDRES 0.126314 Hz  
 AQ 3.9584243 sec  
 RG 724.1  
 DW 60.400 usec  
 DE 6.00 usec  
 TE 292.2 K  
 D1 1.00000000 sec  
 TD0 1

===== CHANNEL f1 =====  
 NUC1 1H  
 P1 14.00 usec  
 PL1 0.00 dB  
 SFO1 400.1324710 MHz

F2 - Processing parameters  
 SI 65536  
 SF 400.1300220 MHz  
 EM  
 WDW 0  
 SSB 0.30 Hz  
 LB 0  
 GB 0  
 PC 1.00

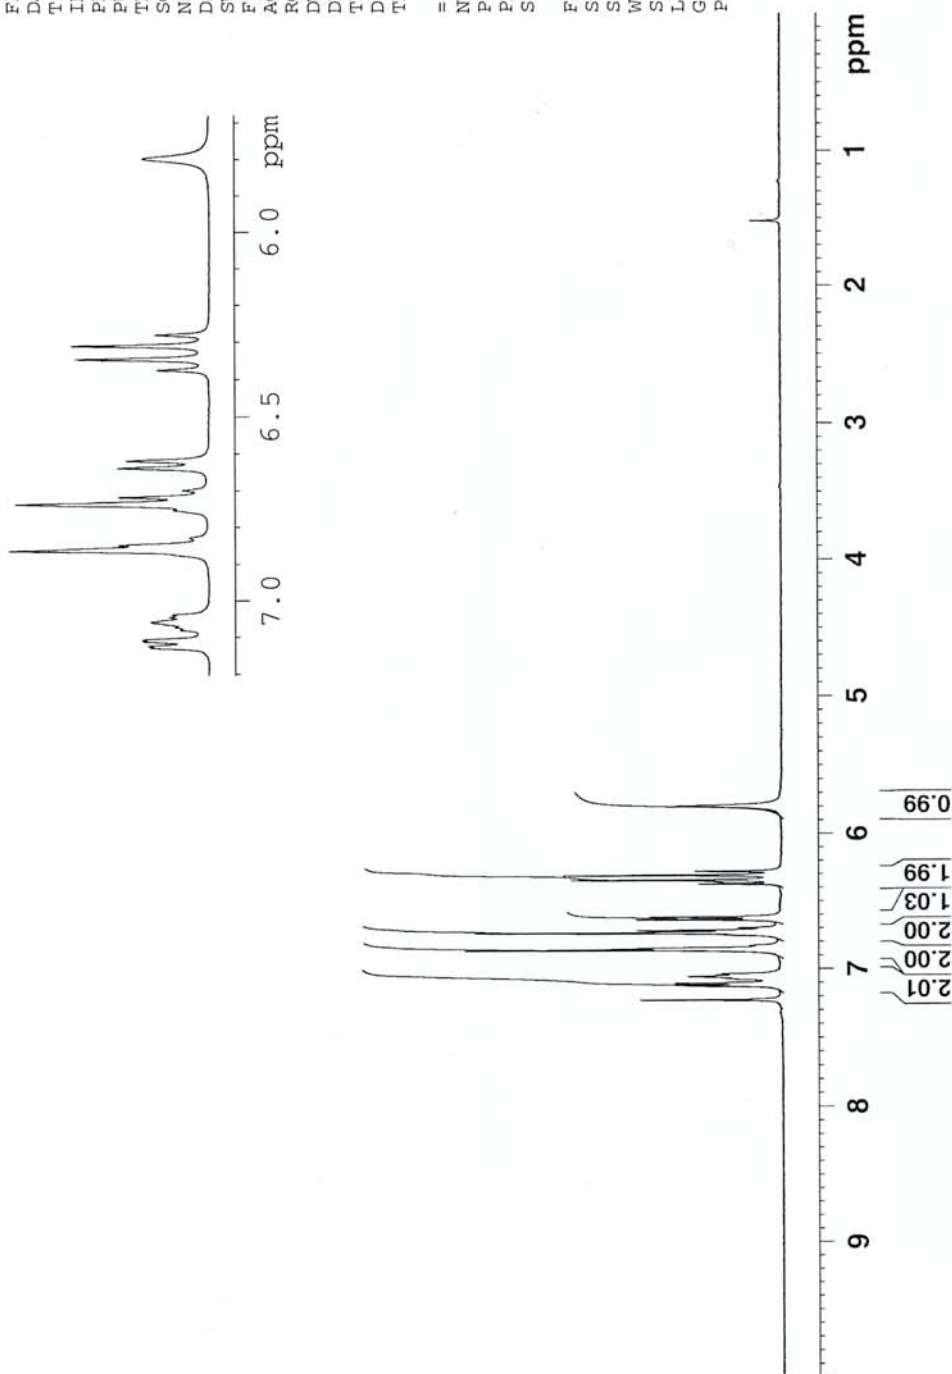

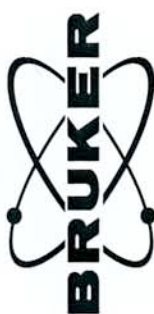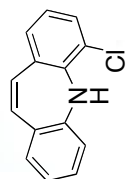

147.50  
144.24  
132.97  
131.60  
131.52  
130.41  
129.81  
129.76  
129.13  
129.05  
123.58  
123.41  
123.16  
120.61

77.41  
77.10  
76.78

Current Data Parameters  
NAME 519-2  
EXPNO 2  
PROCNO 1

F2 - Acquisition Parameters  
Date\_ 20100331  
Time 8.44  
INSTRUM spect  
PROBHD 5 mm QNP 1H/13  
PULPROG zgpg30  
TD 65536  
SOLVENT CDCl3  
NS 101  
DS 4  
SWH 23980.814 Hz  
FIDRES 0.365918 Hz  
AQ 1.3664756 sec  
RG 1625.5  
DW 20.850 usec  
DE 6.00 usec  
TE 294.2 K  
D1 2.00000000 sec  
d11 0.03000000 sec  
DELTA 1.89999998 sec  
TD0 1

==== CHANNEL f1 =====  
NUC1 13C  
P1 9.38 usec  
PL1 0.00 dB  
SFO1 100.6228298 MHz

==== CHANNEL f2 =====  
CPDPRG2 waltz16  
NUC2 1H  
PCPD2 90.00 usec  
PL2 0.00 dB  
PL12 16.10 dB  
PL13 19.00 dB  
SFO2 400.1316005 MHz

F2 - Processing parameters  
SI 32768  
SF 100.6127690 MHz  
WDW EM  
SSB 0  
LB 1.00 Hz  
GB 0  
PC 1.60

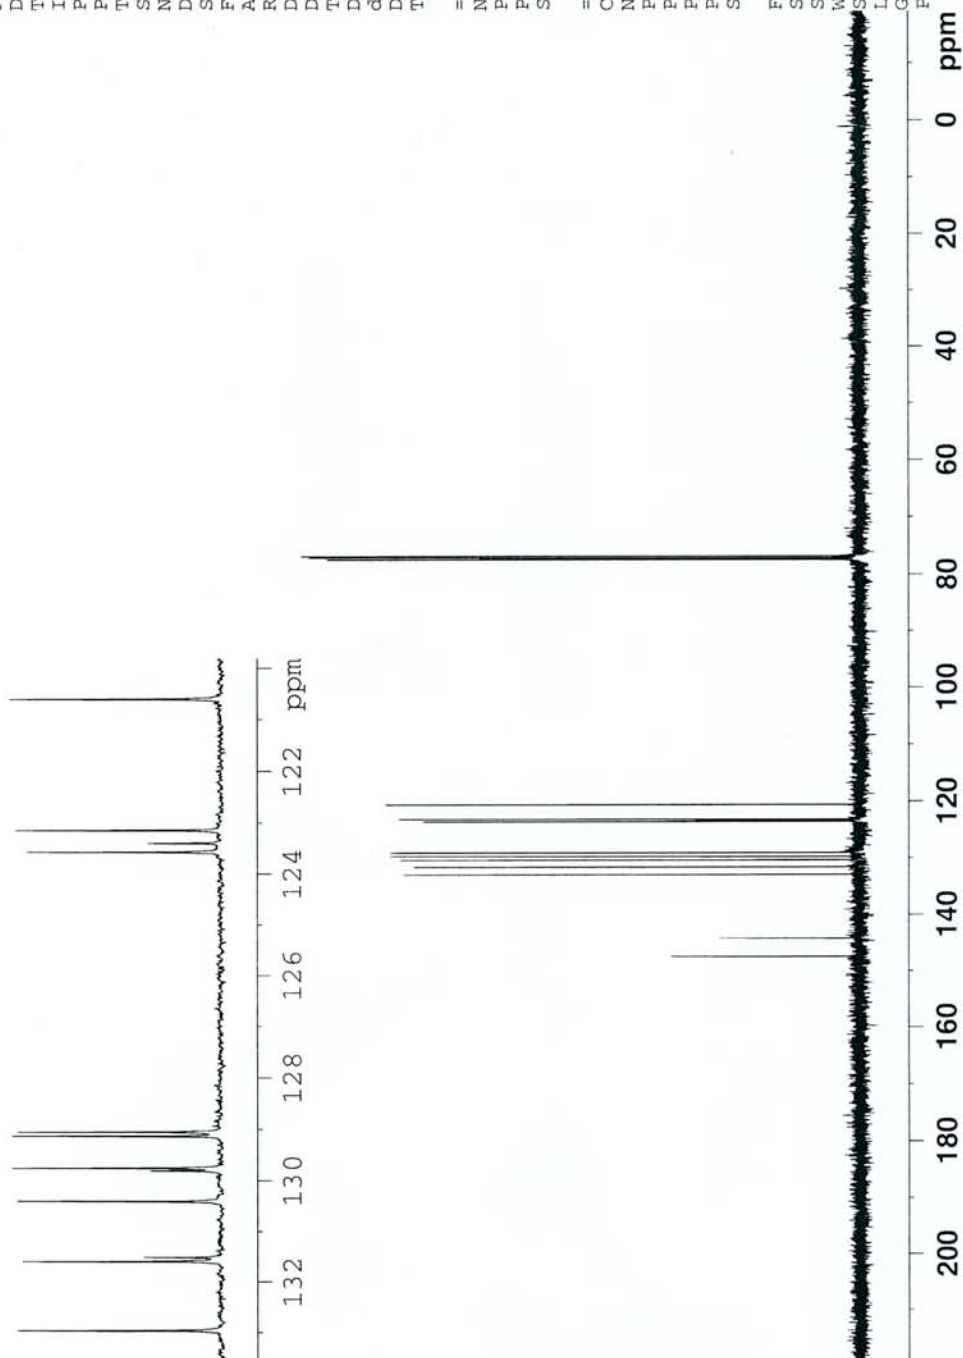

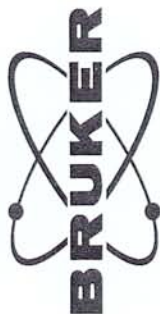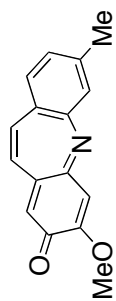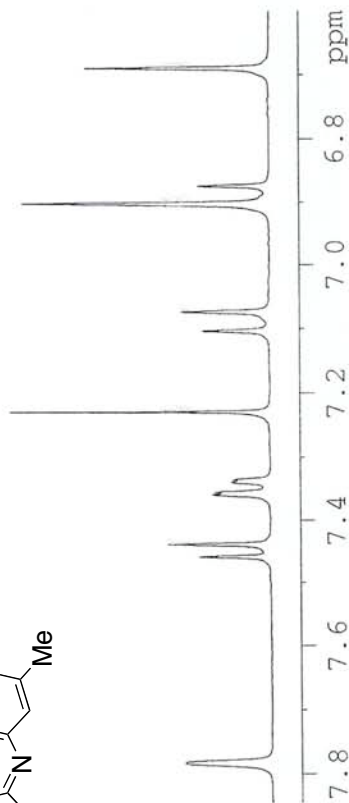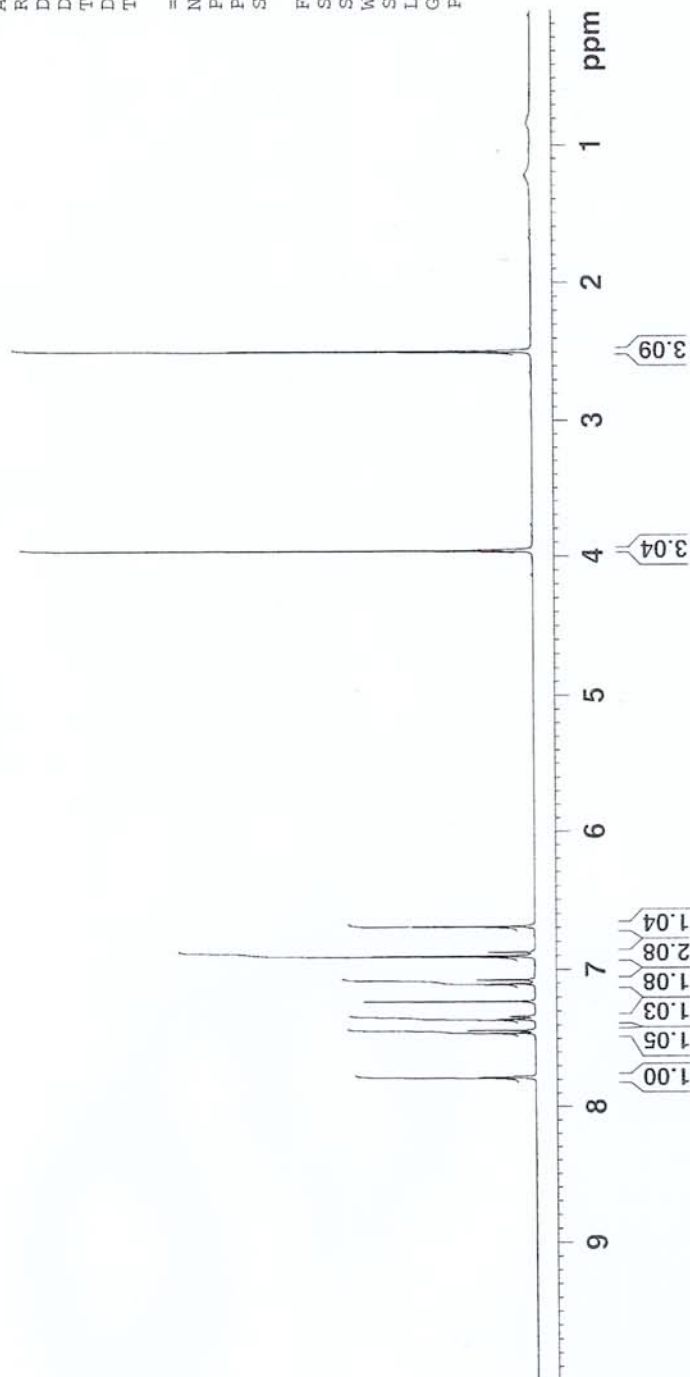

Current Data Parameters  
NAME 6311--1  
EXPNO 1  
PROCNO 1

F2 - Acquisition Parameters  
Date\_ 20100413  
Time 15.08  
INSTRUM spect  
PROBHD 5 mm QNP 1H/13  
PULPROG zg30  
TD 65536  
SOLVENT CDC13  
NS 27  
DS 2  
SWH 8278.146 Hz  
FIDRES 0.126314 Hz  
AQ 3.9584243 sec  
RG 362  
DW 60.400 usec  
DE 6.00 usec  
TE 294.2 K  
D1 1.00000000 sec  
TD0 1

===== CHANNEL f1 =====  
NUC1 1H  
P1 14.00 usec  
PL1 0.00 dB  
SFO1 400.1324710 MHz

F2 - Processing parameters  
SI 65536  
SF 400.1300220 MHz  
WDW EM  
SSB 0  
LB 0.30 Hz  
GB 0  
PC 1.00

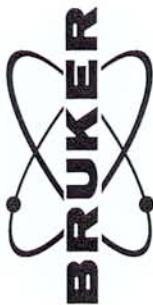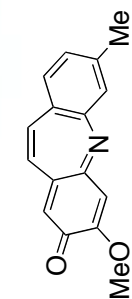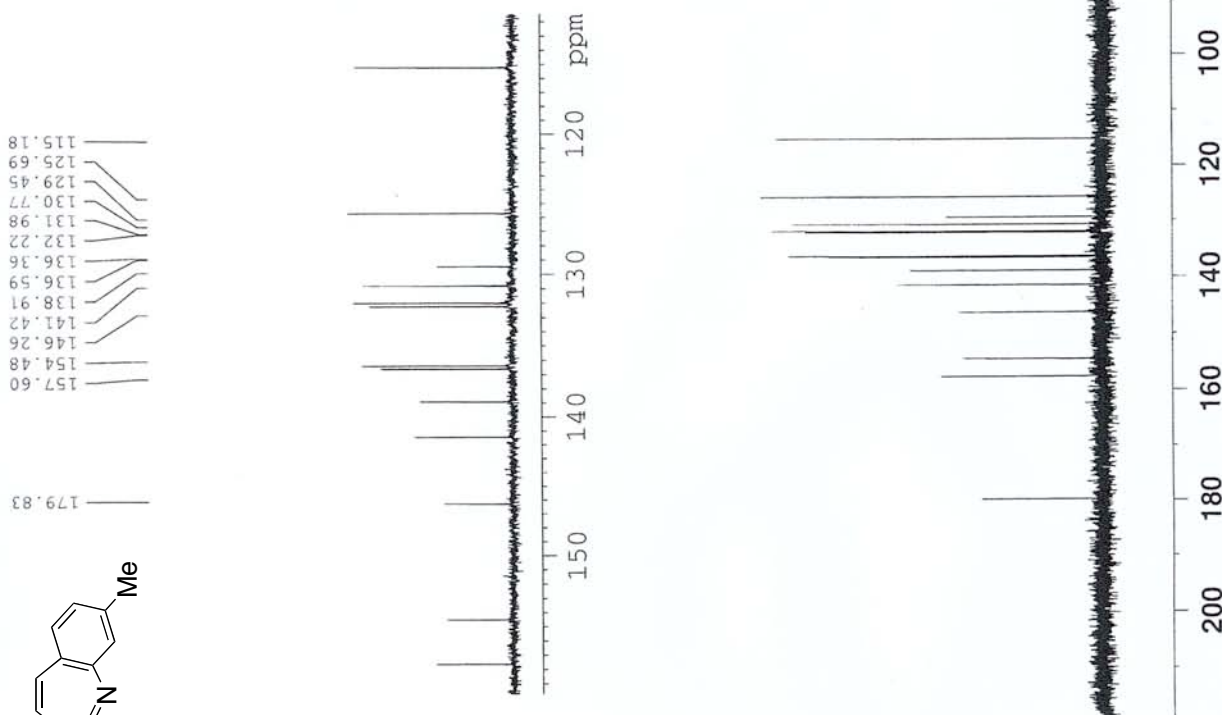

Current Data Parameters  
NAME 631-C  
EXPNO 2  
PROCNO 1

F2 - Acquisition Parameters  
Date\_ 20100413  
Time 20.29  
INSTRUM spect  
PROBHD 5 mm QNP 1H/13  
PULPROG zgpg30  
TD 65536  
SOLVENT CDCl3  
NS 2431  
DS 4  
SWH 23980.814 Hz  
FIDRES 0.365918 Hz  
AQ 1.3664756 sec  
RG 3251  
DW 20.850 usec  
DE 6.00 usec  
TE 294.2 K  
D1 2.00000000 sec  
d11 0.03000000 sec  
DELTA 1.89999998 sec  
TD0 1

===== CHANNEL f1 =====  
NUC1 13C  
P1 9.38 usec  
PL1 0.00 dB  
SFO1 100.6228298 MHz

===== CHANNEL f2 =====  
CPDPRG2 waltz16  
NUC2 1H  
PCPD2 90.00 usec  
PL2 0.00 dB  
PL12 16.10 dB  
PL13 19.00 dB  
SFO2 400.1316005 MHz

F2 - Processing parameters  
SI 32768  
SF 100.6127690 MHz  
WDW EM  
SSB 0  
LB 1.00 Hz  
GB 0  
PC 2.00

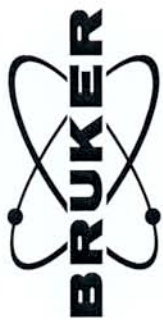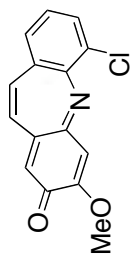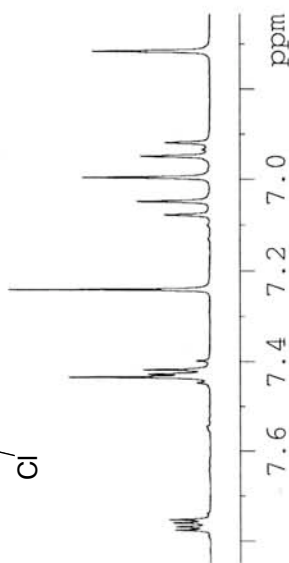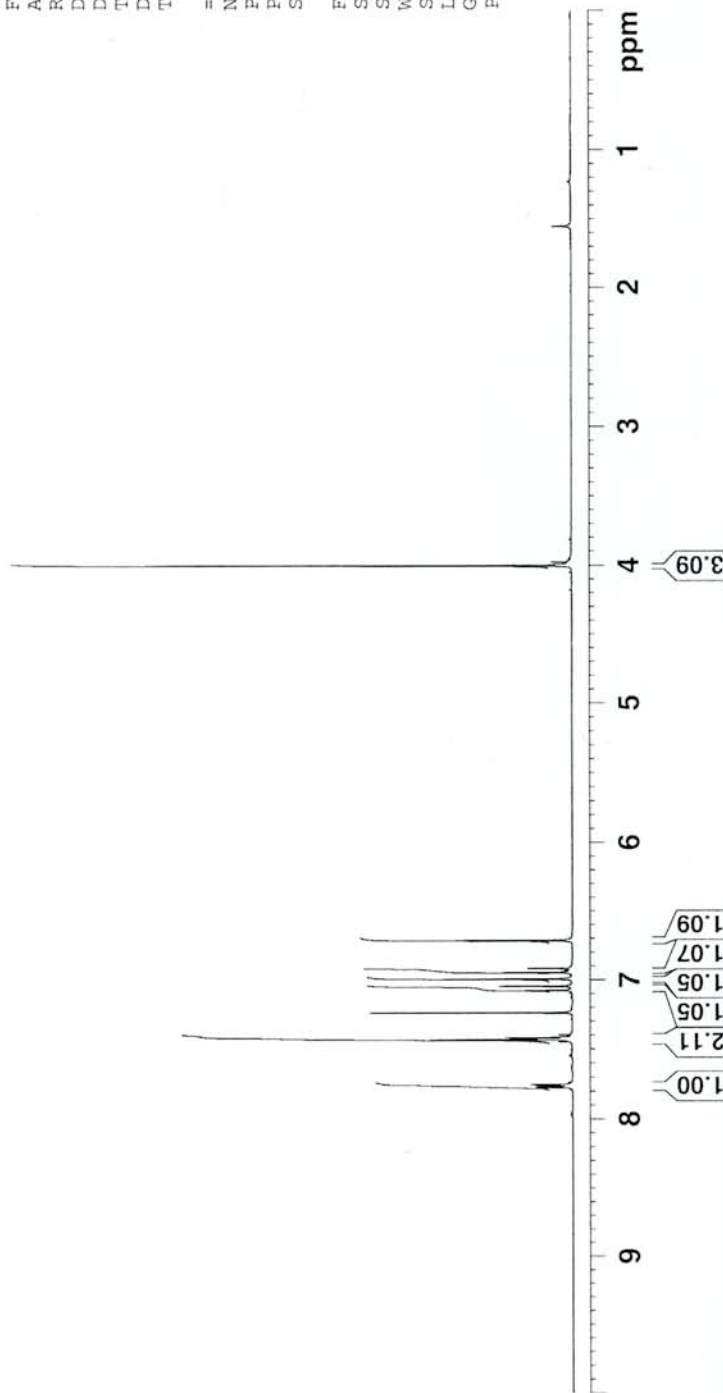

Current Data Parameters  
 NAME 632-3  
 EXPNO 1  
 PROCNO 1

F2 - Acquisition Parameters  
 Date\_ 20100326  
 Time 18.11  
 INSTRUM spect  
 PROBHD 5 mm QNP 1H/13  
 PULPROG zg30  
 TD 65536  
 SOLVENT CDCl3  
 NS 16  
 DS 2  
 SWH 8278.146 Hz  
 FIDRES 0.126314 Hz  
 AQ 3.9584243 sec  
 RG 362  
 DW 60.400 usec  
 DE 6.00 usec  
 TE 295.2 K  
 D1 1.00000000 sec  
 TD0 1

===== CHANNEL f1 =====  
 NUC1 1H  
 P1 14.00 usec  
 PL1 0.00 dB  
 SF01 400.1324710 MHz

F2 - Processing parameters  
 SI 65536  
 SF 400.1300175 MHz  
 WDW EM  
 SSB 0  
 LB 0.30 Hz  
 GB 0  
 PC 1.00

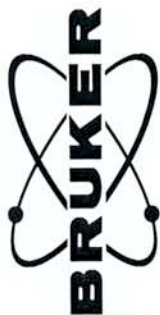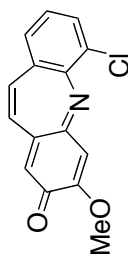

180.01  
157.91  
154.54  
142.05  
140.01  
138.11  
135.96  
133.38  
132.16  
131.70  
131.16  
130.76  
126.46  
115.16

77.36  
77.24  
77.04  
76.72  
56.34

Current Data Parameters  
NAME 632---C  
EXPNO 1  
PROCNO 1

F2 - Acquisition Parameters  
Date\_ 20100414  
Time 20.54  
INSTRUM spect  
PROBHD 5 mm QNP 1H/13  
PULPROG zgpg30  
TD 65536  
SOLVENT CDCl3  
NS 2752  
DS 4  
SWH 23980.814 Hz  
FIDRES 0.365918 Hz  
AQ 1.3664756 sec  
RG 5160.6  
DW 20.850 usec  
DE 6.00 usec  
TE 294.2 K  
D1 2.00000000 sec  
d11 0.03000000 sec  
DELTA 1.89999998 sec  
TDO 1

==== CHANNEL f1 =====  
NUC1 13C  
P1 9.38 usec  
PL1 0.00 dB  
SFO1 100.6228298 MHz

==== CHANNEL f2 =====  
CPDPRG2 waltz16  
NUC2 1H  
PCPD2 90.00 usec  
PL2 0.00 dB  
PL12 16.10 dB  
PL13 19.00 dB  
SFO2 400.1316005 MHz

F2 - Processing parameters  
SI 32768  
SF 100.6127690 MHz  
WDW EM  
SSB 0  
LB 1.00 Hz  
GB 0  
PC 1.40

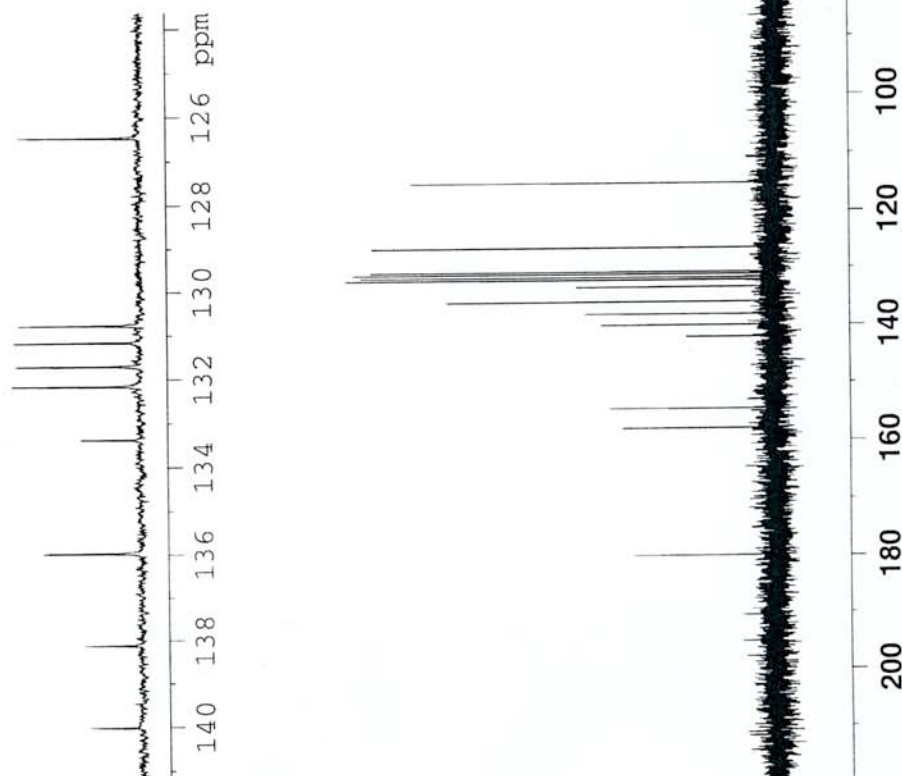

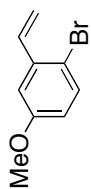

Current Data Parameters  
 NAME 610  
 EXPNO 1  
 PROCNO 1

F2 - Acquisition Paramet  
 Date\_ 20100114  
 Time 16.51  
 INSTRUM spect  
 PROBHD 5 mm BBO BB-1H  
 PULPROG zg30  
 TD 65536  
 SOLVENT CDCl3  
 NS 8  
 DS 2  
 SWH 8278.146  
 FIDRES 0.126314  
 AQ 3.9584243  
 RG 80.6  
 DW 60.400  
 DE 6.00  
 TE 293.2  
 D1 1.00000000  
 TD0 1

==== CHANNEL f1 ====  
 NUC1 1H  
 P1 15.07  
 PL1 0.00  
 SFO1 400.1324710

F2 - Processing paramete  
 SI 65536  
 SF 400.1300212  
 WDW EM  
 SSB 0  
 LB 0.30  
 GB 0  
 PC 1.00

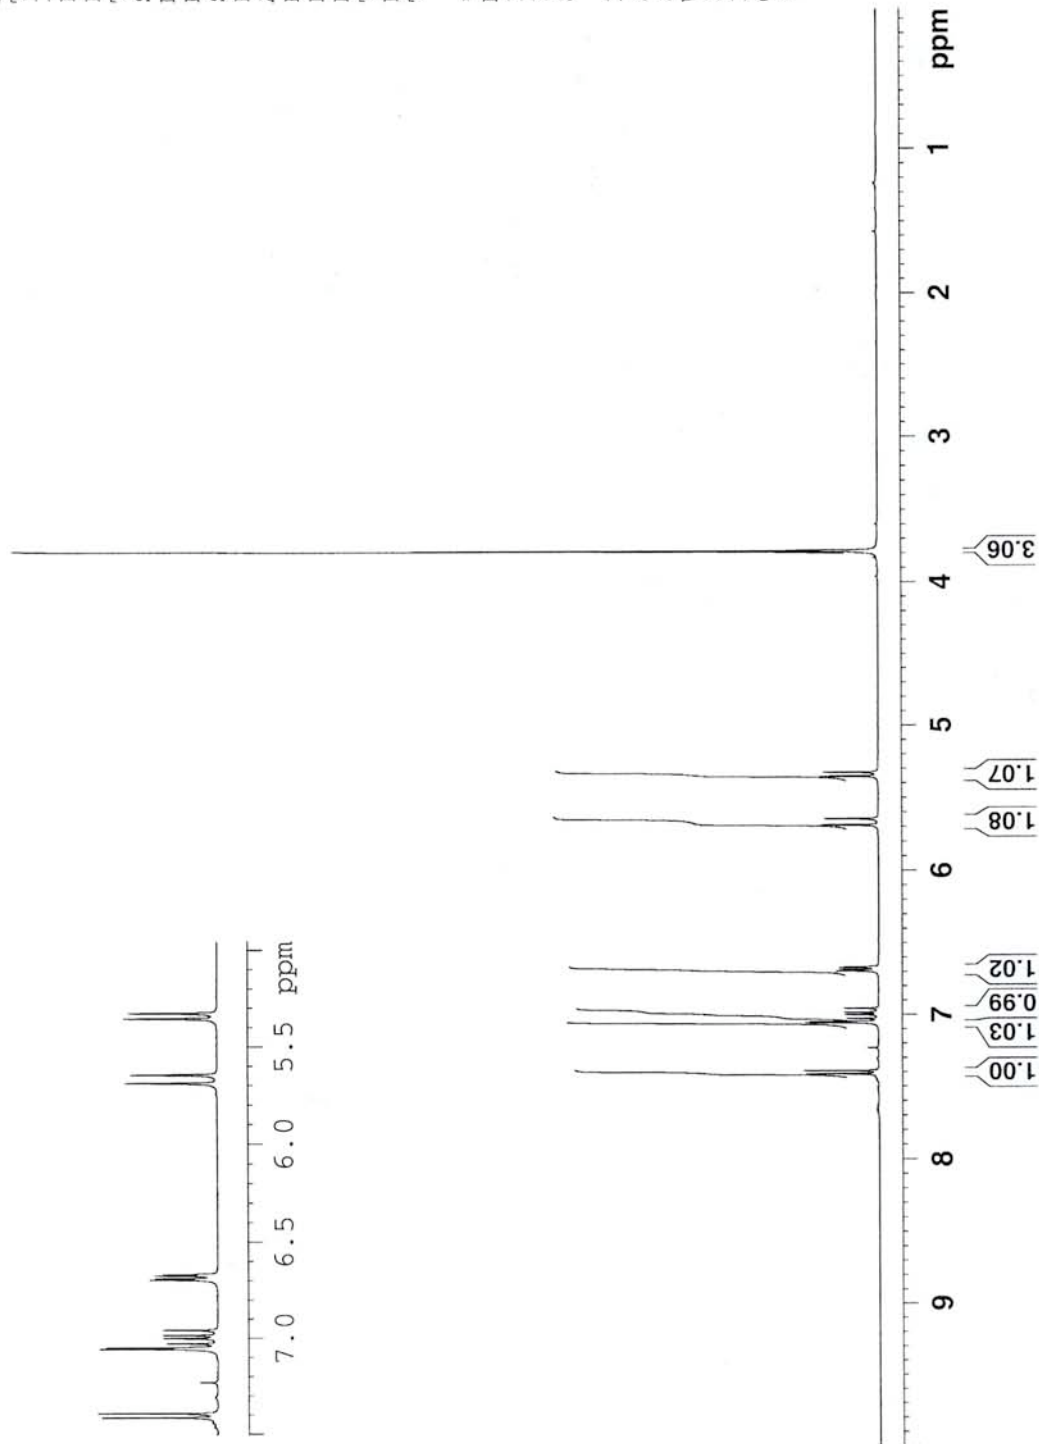

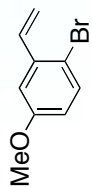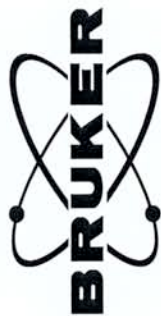

Current Data Parameters  
 NAME 610-1  
 EXPNO 2  
 PROCNO 1

F2 - Acquisition Parameters  
 Date\_ 20100326  
 Time 18.53  
 INSTRUM spect  
 PROBHD 5 mm QNP 1H/13  
 PULPROG zgpg30  
 TD 65536  
 SOLVENT CDCl3  
 NS 15  
 DS 4  
 SWH 23980.814 Hz  
 FIDRES 0.365918 Hz  
 AQ 1.3664756 sec  
 RG 1625.5  
 DW 20.850 usec  
 DE 6.00 usec  
 TE 295.2 K  
 D1 2.00000000 sec  
 d11 0.03000000 sec  
 DELTA 1.89999998 sec  
 TD0 1

===== CHANNEL f1 =====  
 NUC1 13C  
 P1 9.38 usec  
 PL1 0.00 dB  
 SFO1 100.6228298 MHz

===== CHANNEL f2 =====  
 CPDPRG2 waltz16  
 NUC2 1H  
 PCPD2 90.00 usec  
 PL2 0.00 dB  
 PL12 16.10 dB  
 PL13 19.00 dB  
 SFO2 400.1316005 MHz

F2 - Processing parameters  
 SI 32768  
 SF 100.6127690 MHz  
 WDW EM  
 SSB 0  
 LB 1.00 Hz  
 GB 0  
 PC 1.40

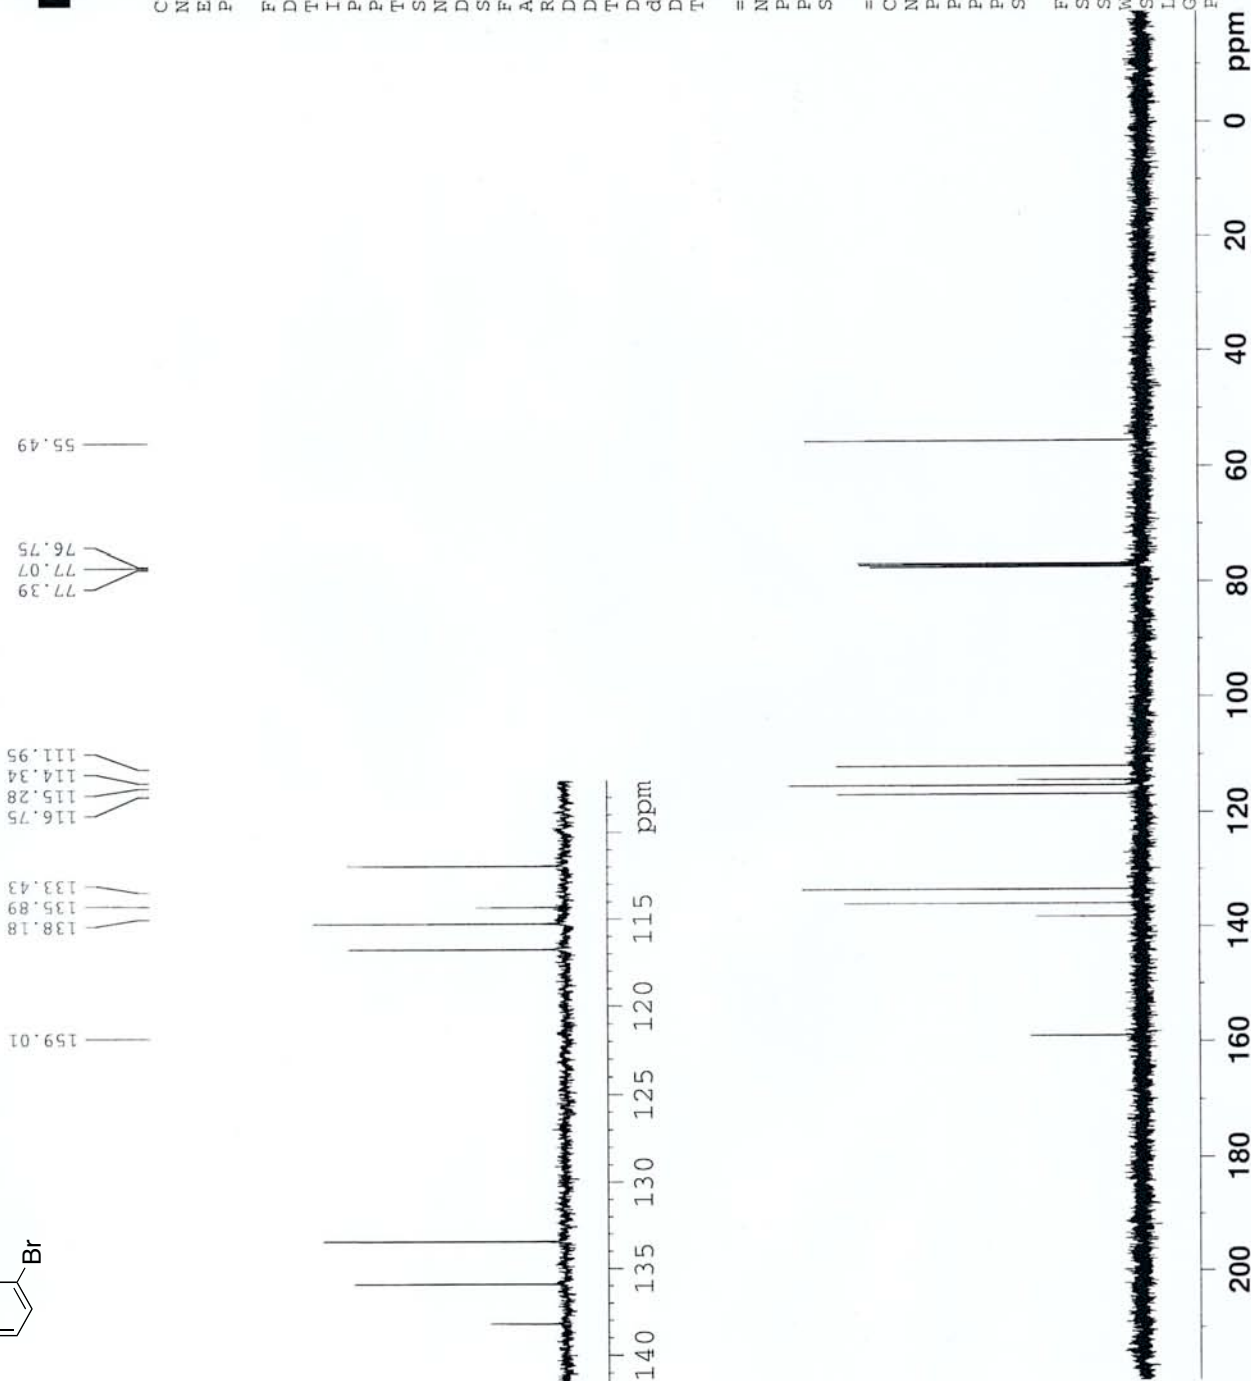

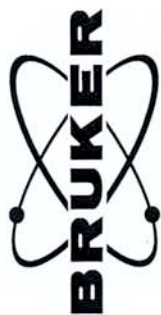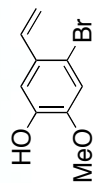

Current Data Parameters  
 NAME 620  
 EXPNO 3  
 PROCNO 1

F2 - Acquisition Parameters  
 Date\_ 20100223  
 Time 8.04  
 INSTRUM spect  
 PROBHD 5 mm QNP 1H/13  
 PULPROG zg30  
 TD 65536  
 SOLVENT CDCl3  
 NS 8  
 DS 2  
 SWH 8278.146 Hz  
 FIDRES 0.126314 Hz  
 AQ 3.9584243 sec  
 RG 181  
 DW 60.400 usec  
 DE 6.00 usec  
 TE 294.2 K  
 D1 1.0000000 sec  
 TD0 1

===== CHANNEL f1 =====  
 NUC1 1H  
 P1 14.00 usec  
 PL1 0.00 dB  
 SFO1 400.1324710 MHz

F2 - Processing parameters  
 SI 65536  
 SF 400.1300220 MHz  
 WDW EM  
 SSB 0  
 LB 0.30 Hz  
 GB 0  
 PC 1.00

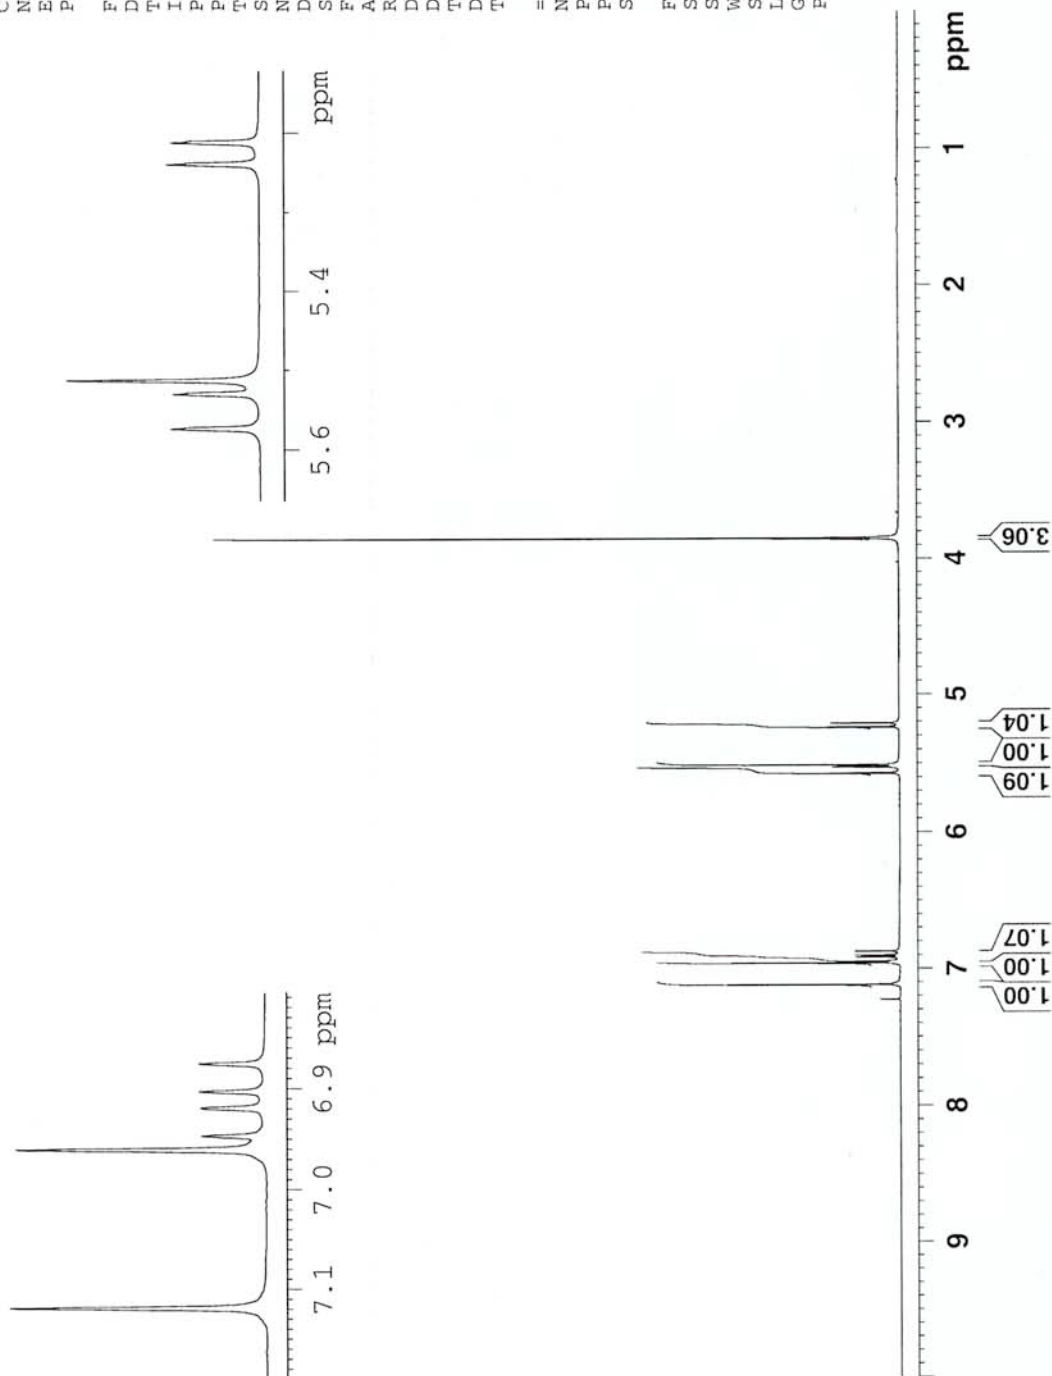

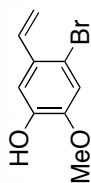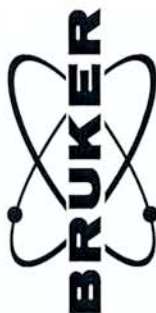

Current Data Parameters  
NAME 620  
EXPNO 4  
PROCNO 1

F2 - Acquisition Parameters  
Date\_ 20100223  
Time 8.16  
INSTRUM spect  
PROBHD 5 mm QNP 1H/13  
PULPROG zgpg30  
TD 65536  
SOLVENT CDCl3  
NS 87  
DS 4  
SWH 23980.814 Hz  
FIDRES 0.365918 Hz  
AQ 1.3664756 sec  
RG 1824.6  
DE 20.850 usec  
TE 295.2 K  
D1 2.00000000 sec  
d11 0.03000000 sec  
DELTA 1.89999998 sec  
TDO 1

===== CHANNEL f1 =====  
NUC1 13C  
P1 9.38 usec  
PL1 0.00 dB  
SFO1 100.6228298 MHz

===== CHANNEL f2 =====  
CPDPRG2 waltz16  
NUC2 1H  
PCPD2 90.00 usec  
PL2 0.00 dB  
PL12 16.10 dB  
PL13 19.00 dB  
SFO2 400.1316005 MHz

F2 - Processing parameters  
SI 32768  
SF 100.6127690 MHz  
WDW EM  
SSB 0  
LB 1.00 Hz  
GB 0  
PC 1.40

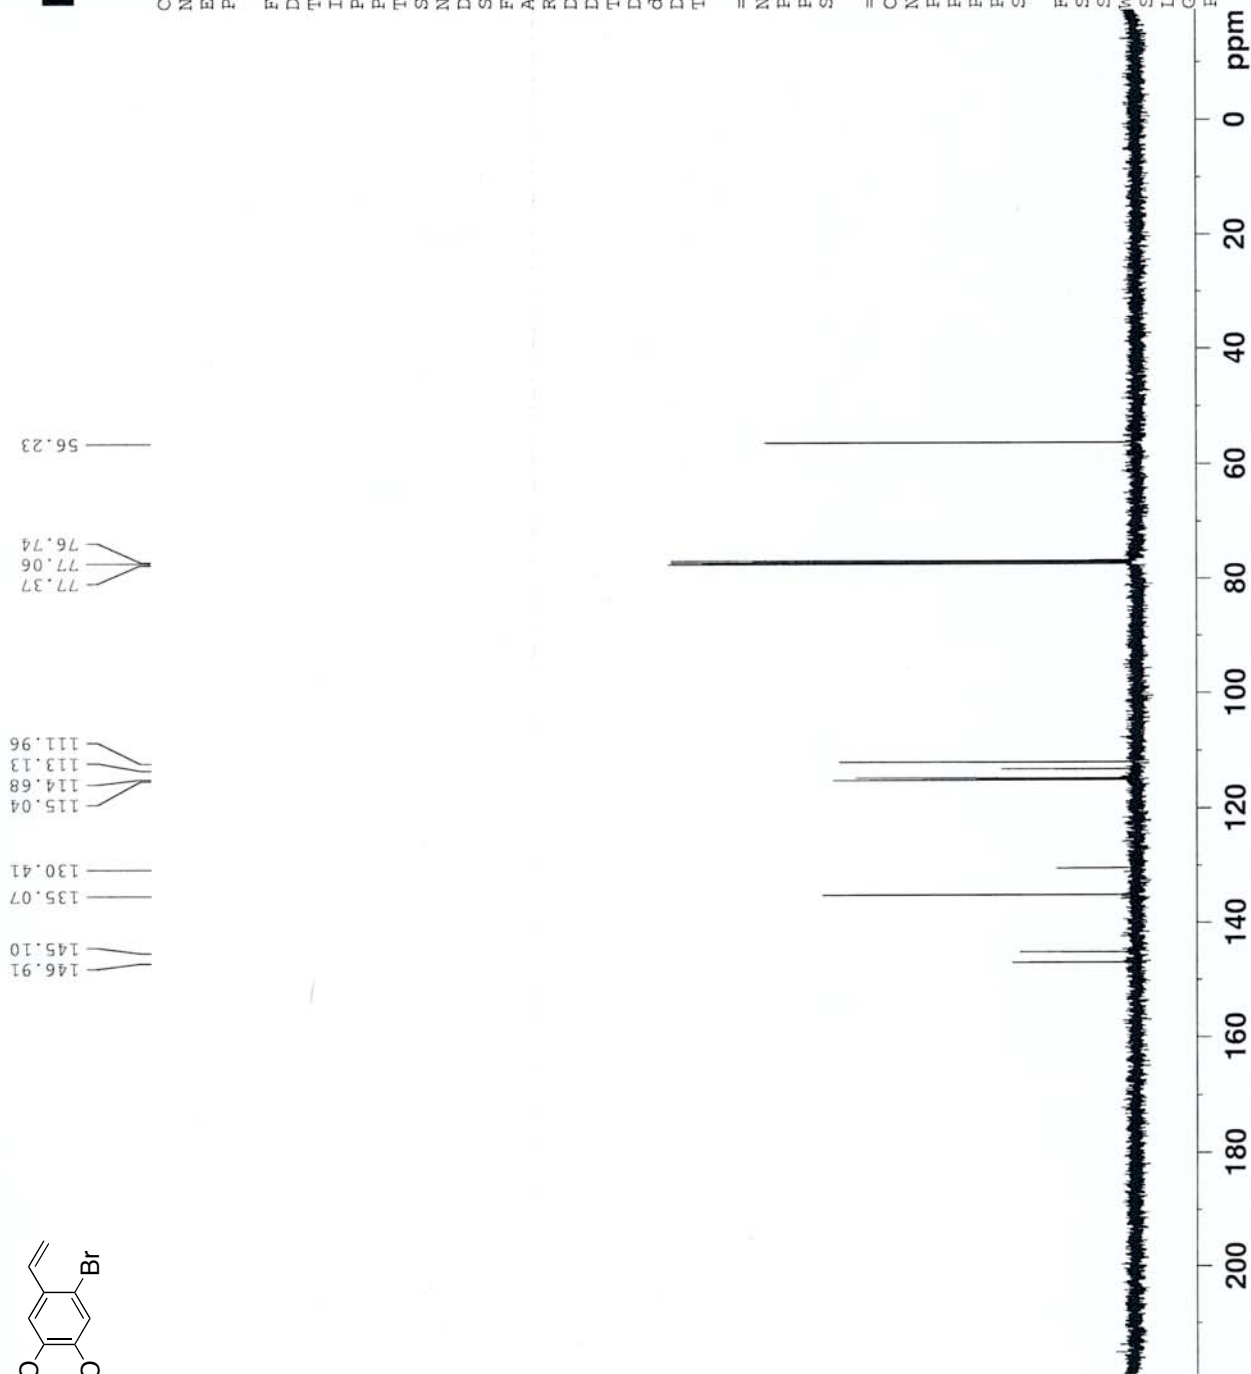

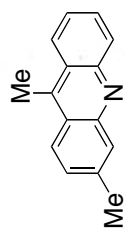

Current Data Parameters  
 NAME 685(2,1)-r  
 EXPNO 1  
 PROCNO 1

F2 - Acquisition Parameters  
 Date\_ 20100606  
 Time 8.12  
 INSTRUM spect  
 PROBHD 5 mm BBO BB-1H  
 PULPROG zg30  
 TD 65536  
 SOLVENT CDCl3  
 NS 16  
 DS 2  
 SWH 8278.146  
 FIDRES 0.126314  
 AQ 3.9584243  
 RG 40.3  
 DW 60.400  
 DE 6.00  
 TE 296.2  
 D1 1.00000000  
 TD0 1

==== CHANNEL f1 ===  
 NUC1 1H  
 P1 15.07  
 PL1 0.00  
 SFO1 400.1324710

F2 - Processing parameters  
 SI 65536  
 SF 400.1300212  
 WDW EM  
 SSB 0  
 LB 0.30  
 GB 0  
 PC 1.00

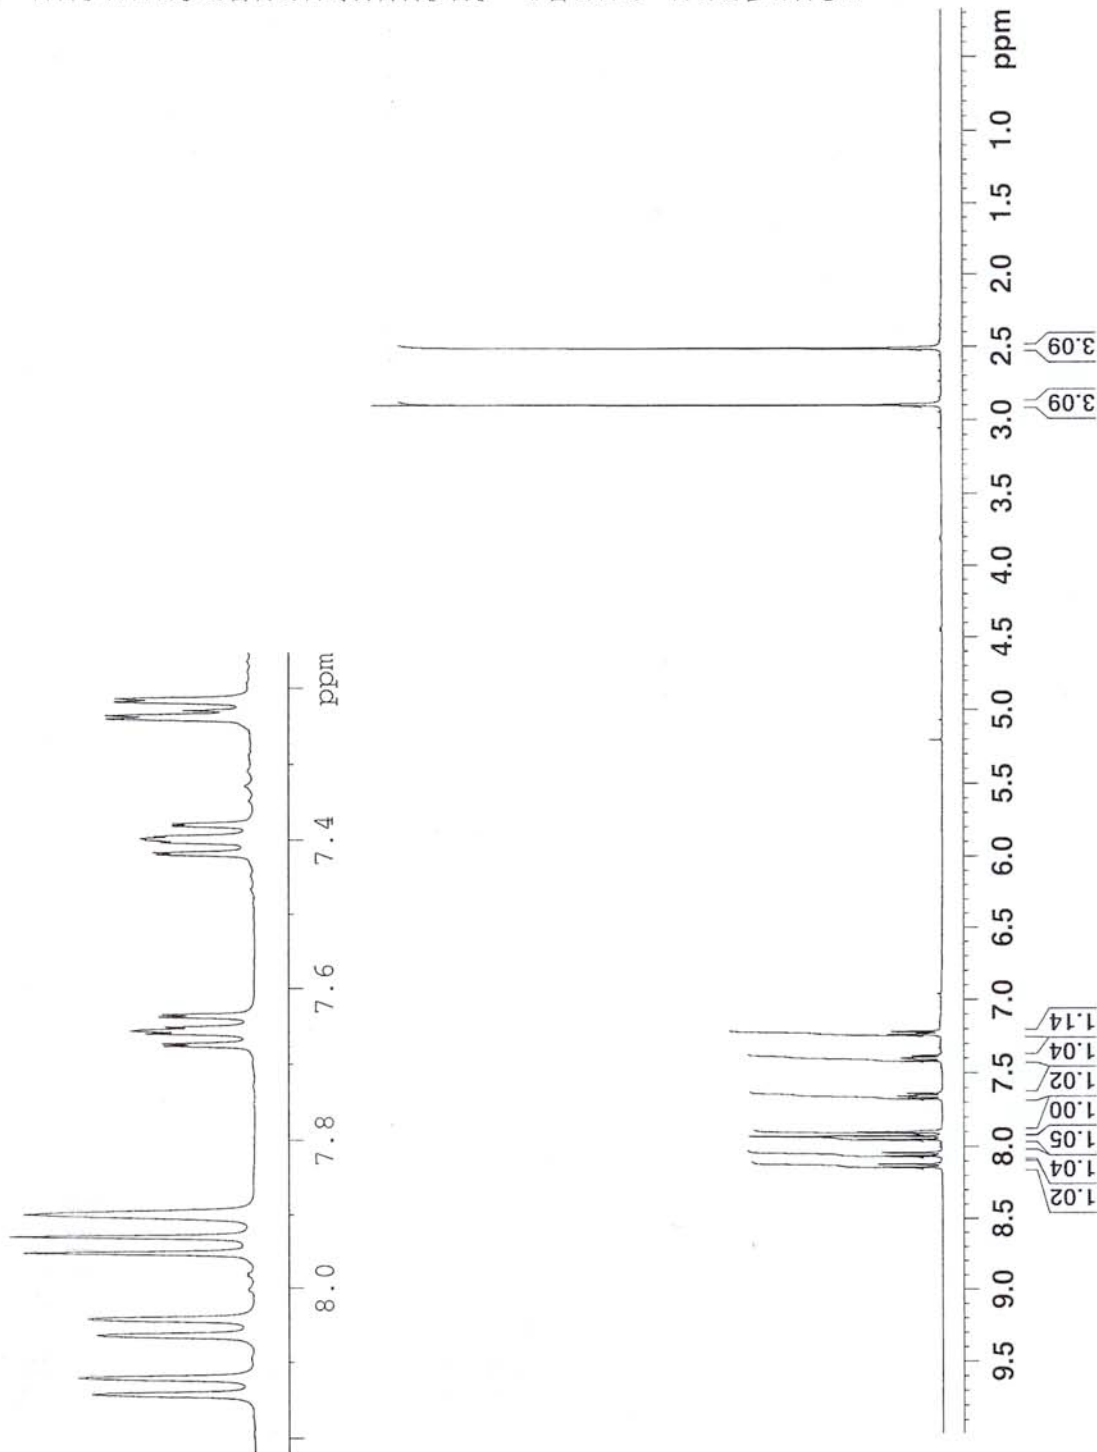

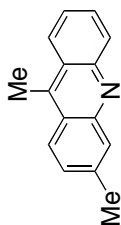

148.51  
148.23  
141.89  
139.95  
129.86  
129.51  
128.25  
128.03  
125.07  
124.81  
124.45  
124.09  
123.73

77.52  
77.20  
76.88

21.98  
13.42

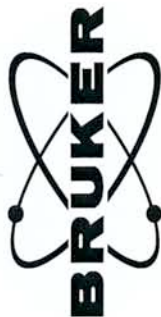

Current Data Parameters  
NAME 685  
EXPNO 3  
PROCNO 1

F2 - Acquisition Parameters  
Date\_ 20100612  
Time 11.28  
INSTRUM spect  
PROBHD 5 mm QNP 1H/13  
PULPROG zgpg30  
TD 65536  
SOLVENT CDC13  
NS 43  
DS 4  
SWH 23980.814 Hz  
FIDRES 0.365918 Hz  
AQ 1.3664756 sec  
RG 1625.5  
DW 20.850 usec  
DE 6.00 usec  
TE 295.2 K  
D1 2.00000000 sec  
d11 0.03000000 sec  
DELTA 1.89999998 sec  
TD0 1

===== CHANNEL f1 =====  
NUC1 13C  
P1 9.38 usec  
PL1 0.00 dB  
SFO1 100.6228298 MHz

===== CHANNEL f2 =====  
CPDPRG2 waltz16  
NUC2 1H  
PCPD2 90.00 usec  
PL2 0.00 dB  
PL12 16.10 dB  
PL13 19.00 dB  
SFO2 400.1316005 MHz

F2 - Processing parameters  
SI 32768  
SF 100.6127690 MHz  
WDW EM  
SSB 0  
LB 1.00 Hz  
GB 0  
PC 3.00

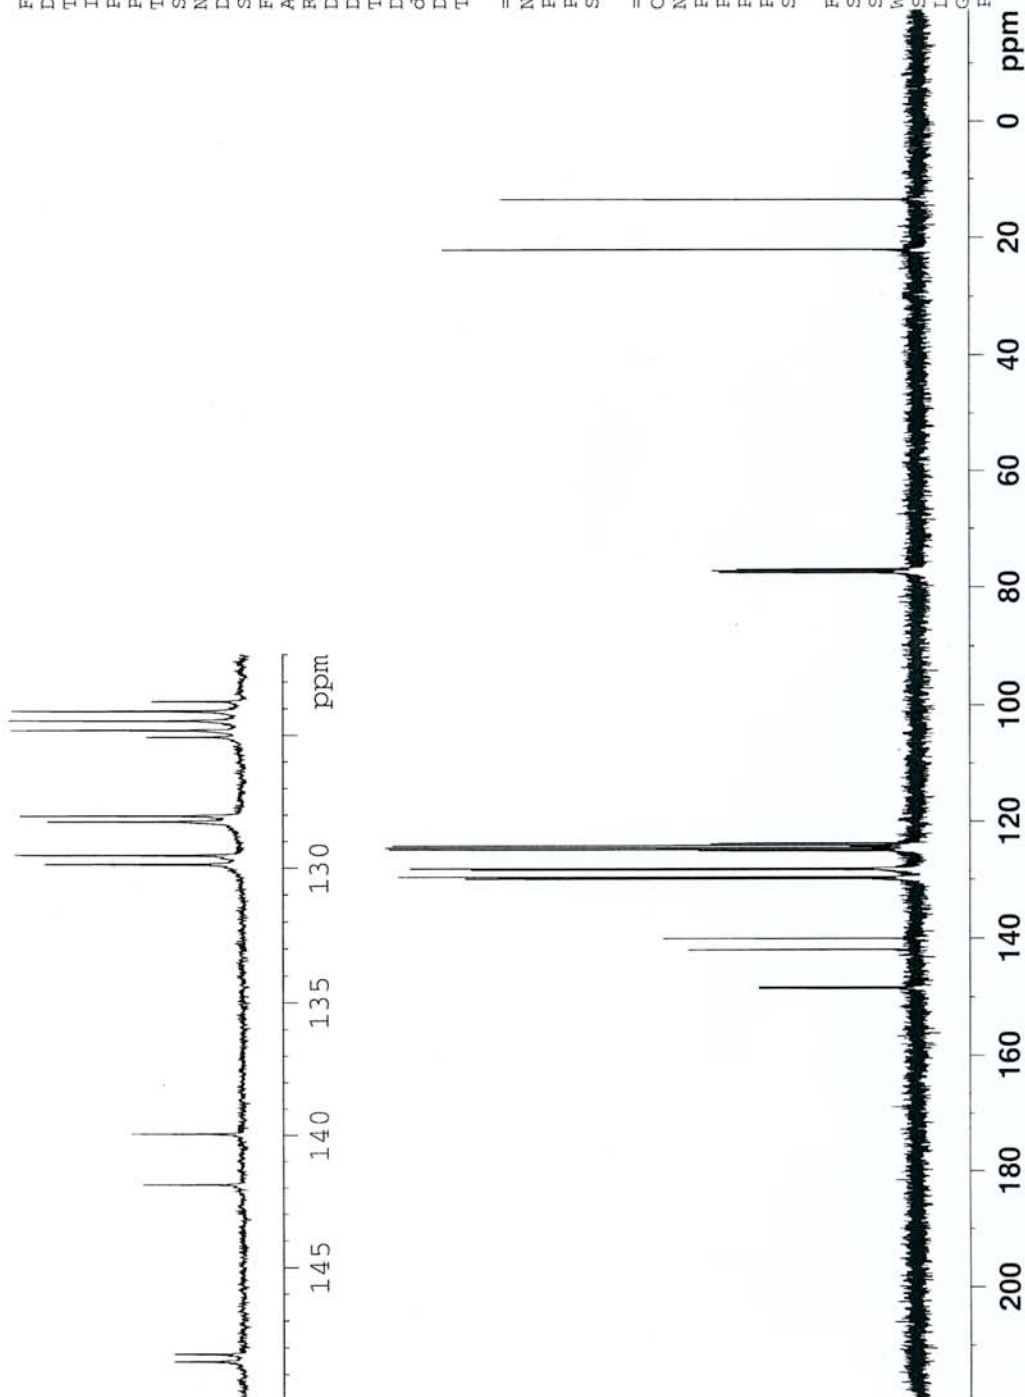

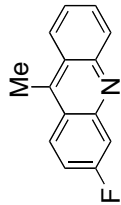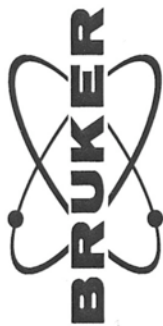

Current Data Parameters  
 NAME 687  
 EXPNO 1  
 PROCNO 1

F2 - Acquisition Parameters

Date\_ 20100610  
 Time 6.48  
 INSTRUM spect  
 PROBHD 5 mm QNP 1H/13  
 PULPROG zg30  
 TD 65536  
 SOLVENT CDCl3  
 NS 14  
 DS 2  
 SWH 8278.146 Hz  
 FIDRES 0.126314 Hz  
 AQ 3.9584243 sec  
 RG 256  
 DW 60.400 usec  
 DE 6.00 usec  
 TE 300.0 K  
 D1 1.00000000 sec  
 TD0 1

==== CHANNEL f1 =====  
 NUC1 1H  
 P1 14.00 usec  
 PL1 0.00 dB  
 SF01 400.1324710 MHz

F2 - Processing parameters

SI 65536  
 SF 400.1300220 MHz  
 WDW EM  
 SSB 0  
 LB 0.30 Hz  
 GB 0  
 PC 1.00

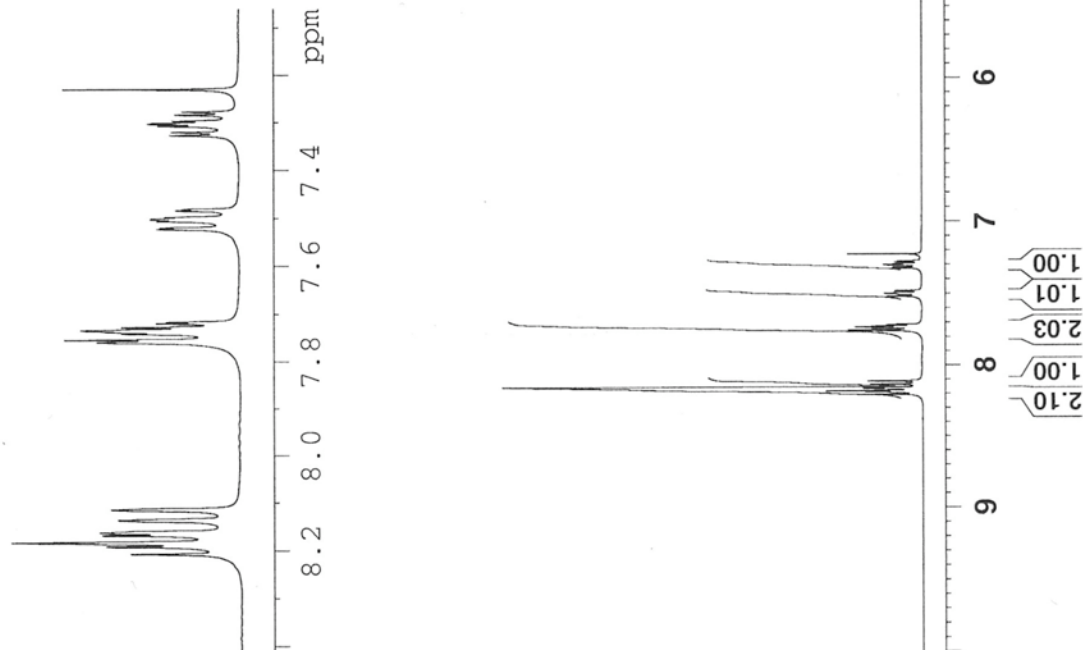

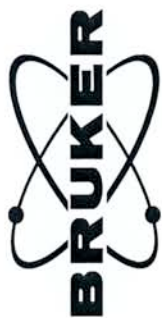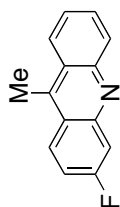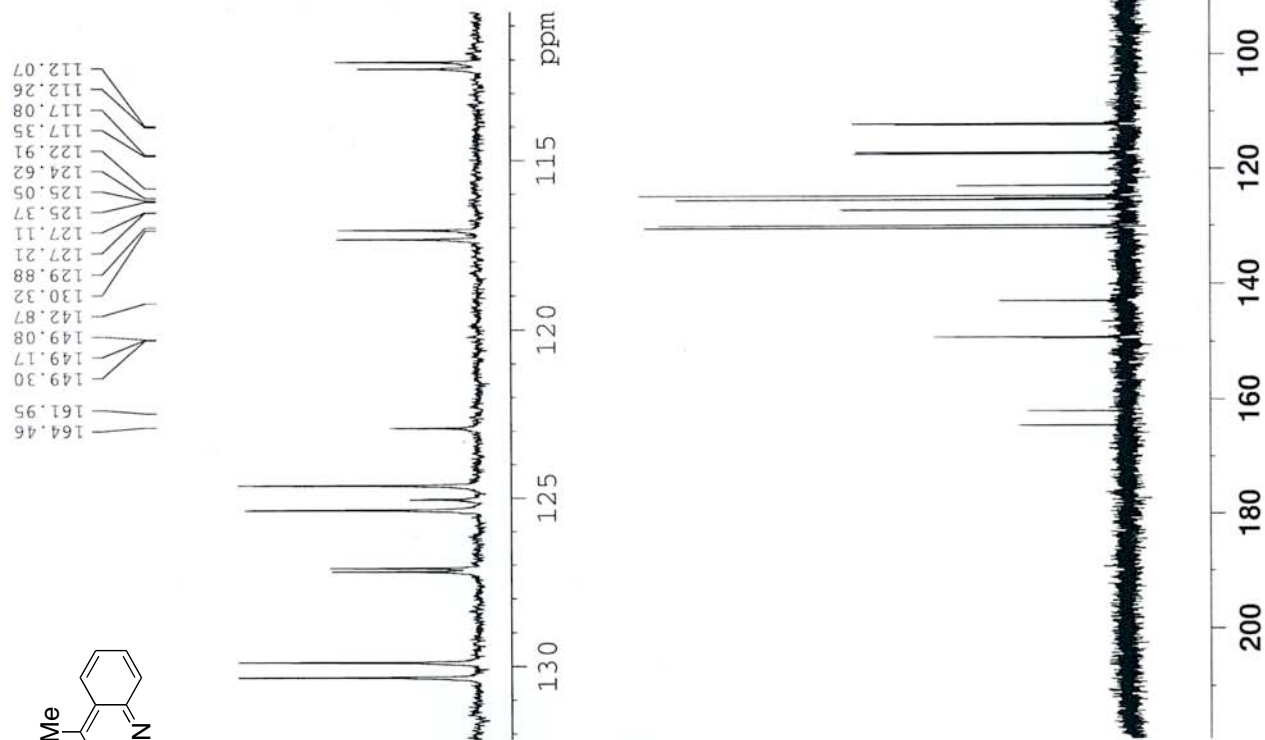

Current Data Parameters  
NAME 687  
EXPNO 2  
PROCNO 1

F2 - Acquisition Parameters  
Date\_ 20100610  
Time 19.39  
INSTRUM spect  
PROBHD 5 mm QNP 1H/13  
PULPROG zgpg30  
TD 65536  
SOLVENT CDCl3  
NS 600  
DS 4  
SWH 23980.814 Hz  
FIDRES 0.365918 Hz  
AQ 1.3664756 sec  
RG 2896.3  
DE 20.850 usec  
TE 295.2 K  
D1 2.00000000 sec  
d11 0.03000000 sec  
DELTA 1.89999998 sec  
TD0 1

==== CHANNEL f1 =====  
NUC1 13C  
P1 9.38 usec  
PL1 0.00 dB  
SFO1 100.6228298 MHz

==== CHANNEL f2 =====  
CPDPRG2 waltz16  
NUC2 1H  
PCPD2 90.00 usec  
PL2 0.00 dB  
PL12 16.10 dB  
PL13 19.00 dB  
SFO2 400.1316005 MHz

F2 - Processing parameters  
SI 32768  
SF 100.6127690 MHz  
WDW EM  
SSB 0  
LB 1.00 Hz  
GB 0  
PC 1.60

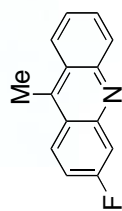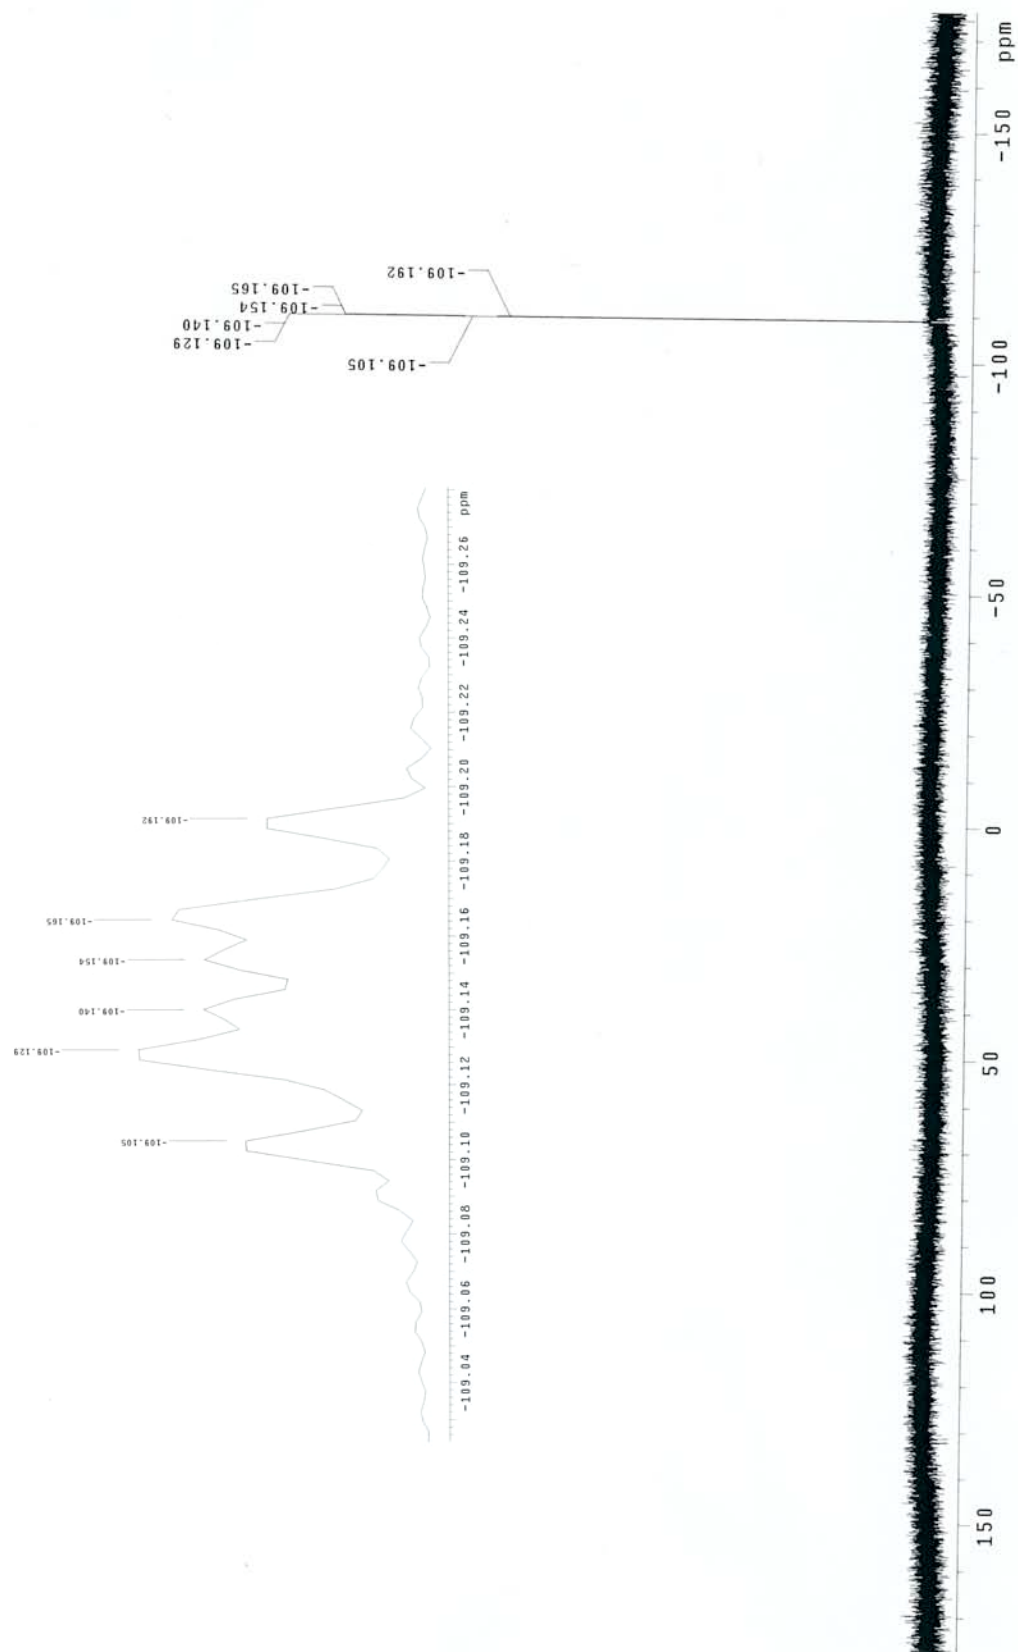

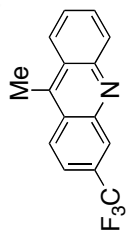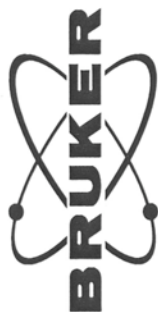

Current Data Parameters  
 NAME 688  
 EXPNO 1  
 PROCNO 1

F2 - Acquisition Parameters  
 Date\_ 20100610  
 Time 7.01  
 INSTRUM spect  
 PROBHD 5 mm QNP 1H/13  
 PULPROG zg30  
 TD 65536  
 SOLVENT CDCl3  
 NS 12  
 DS 2  
 SWH 8278.146 Hz  
 FIDRES 0.126314 Hz  
 AQ 3.9584243 sec  
 RG 161.3  
 DW 60.400 usec  
 DE 6.00 usec  
 TE 294.2 K  
 D1 1.00000000 sec  
 TD0 1

===== CHANNEL f1 =====  
 NUC1 1H  
 P1 14.00 usec  
 PL1 0.00 dB  
 SFO1 400.1324710 MHz

F2 - Processing parameters  
 SI 65536  
 SF 400.1300220 MHz  
 WDW EM  
 SSB 0  
 LB 0.30 Hz  
 GB 0  
 PC 1.00

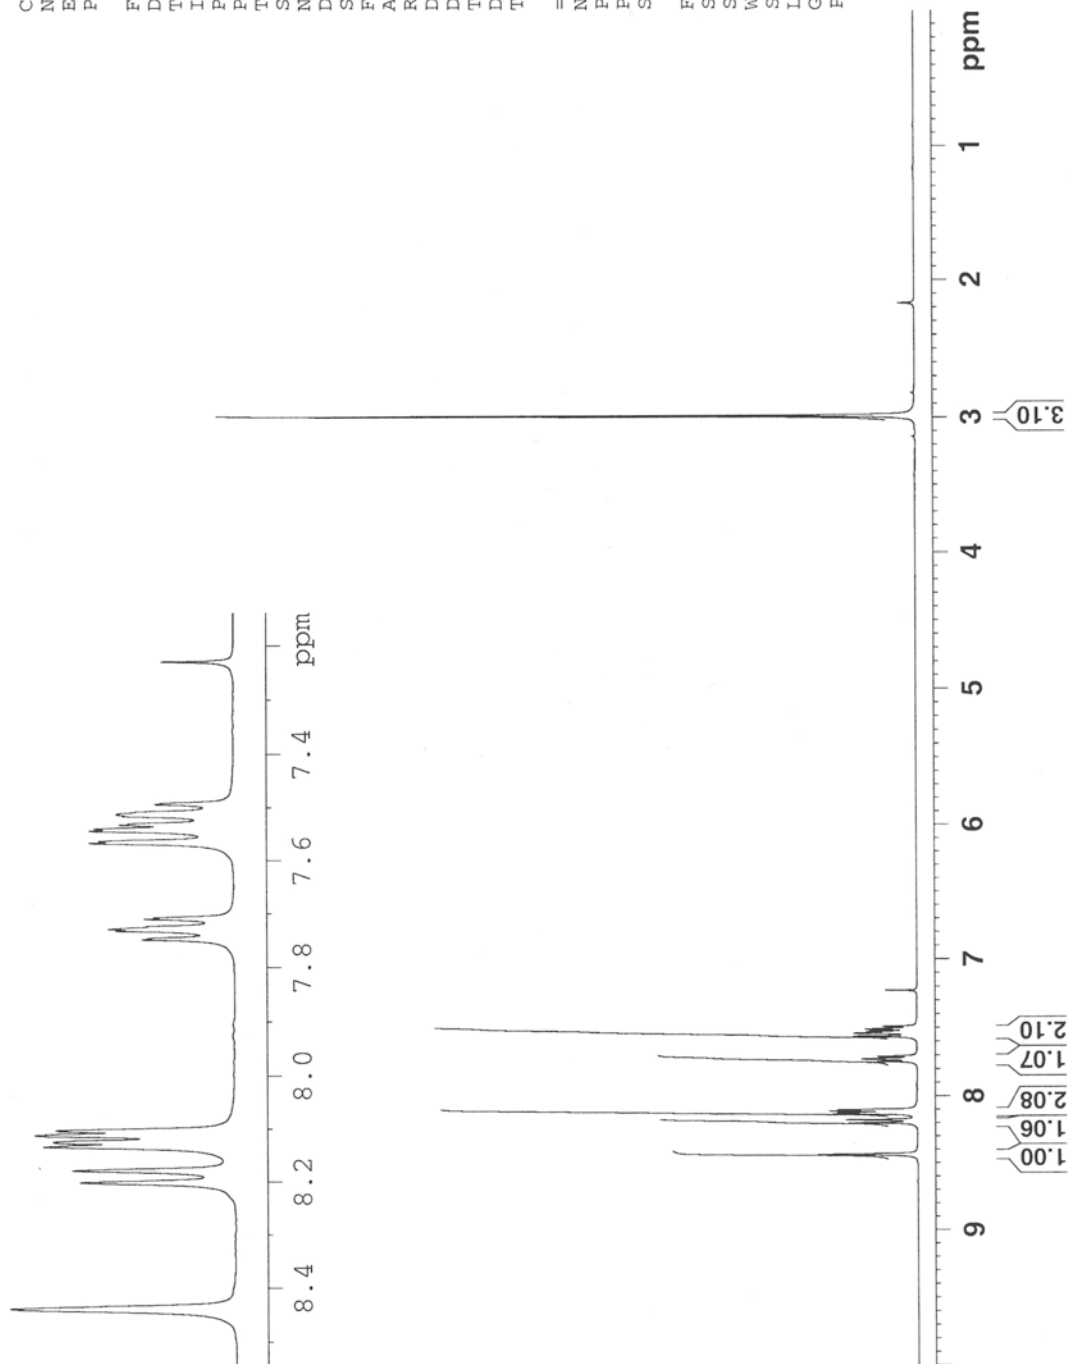

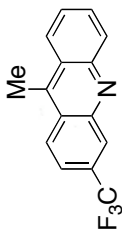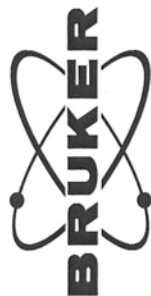

Current Data Parameters  
 NAME 688  
 EXPNO 3  
 PROCNO 1

F2 - Acquisition Parameters  
 Date\_ 20100612  
 Time 11.14  
 INSTRUM spect  
 PROBHD 5 mm QNP 1H/13  
 PULPROG zgpg30  
 TD 65536  
 SOLVENT CDCl3  
 NS 1089  
 DS 4  
 SWH 23980.814 Hz  
 FIDRES 0.365918 Hz  
 AQ 1.3664756 sec  
 RG 1625.5  
 DW 20.850 usec  
 DE 6.00 usec  
 TE 295.2 K  
 D1 2.00000000 sec  
 d11 0.03000000 sec  
 DELTA 1.89999998 sec  
 TDO 1

===== CHANNEL f1 =====  
 NUC1 13C  
 P1 9.38 usec  
 PL1 0.00 dB  
 SFO1 100.6228298 MHz

===== CHANNEL f2 =====  
 CPDPRG2 waltz16  
 NUC2 1H  
 PCPD2 90.00 usec  
 PL2 0.00 dB  
 PL12 16.10 dB  
 PL13 19.00 dB  
 SFO2 400.1316005 MHz

F2 - Processing parameters  
 SI 32768  
 SF 100.6127690 MHz  
 WDW EM  
 SSB 0  
 LB 1.00 Hz  
 GB 0  
 PC 1.80

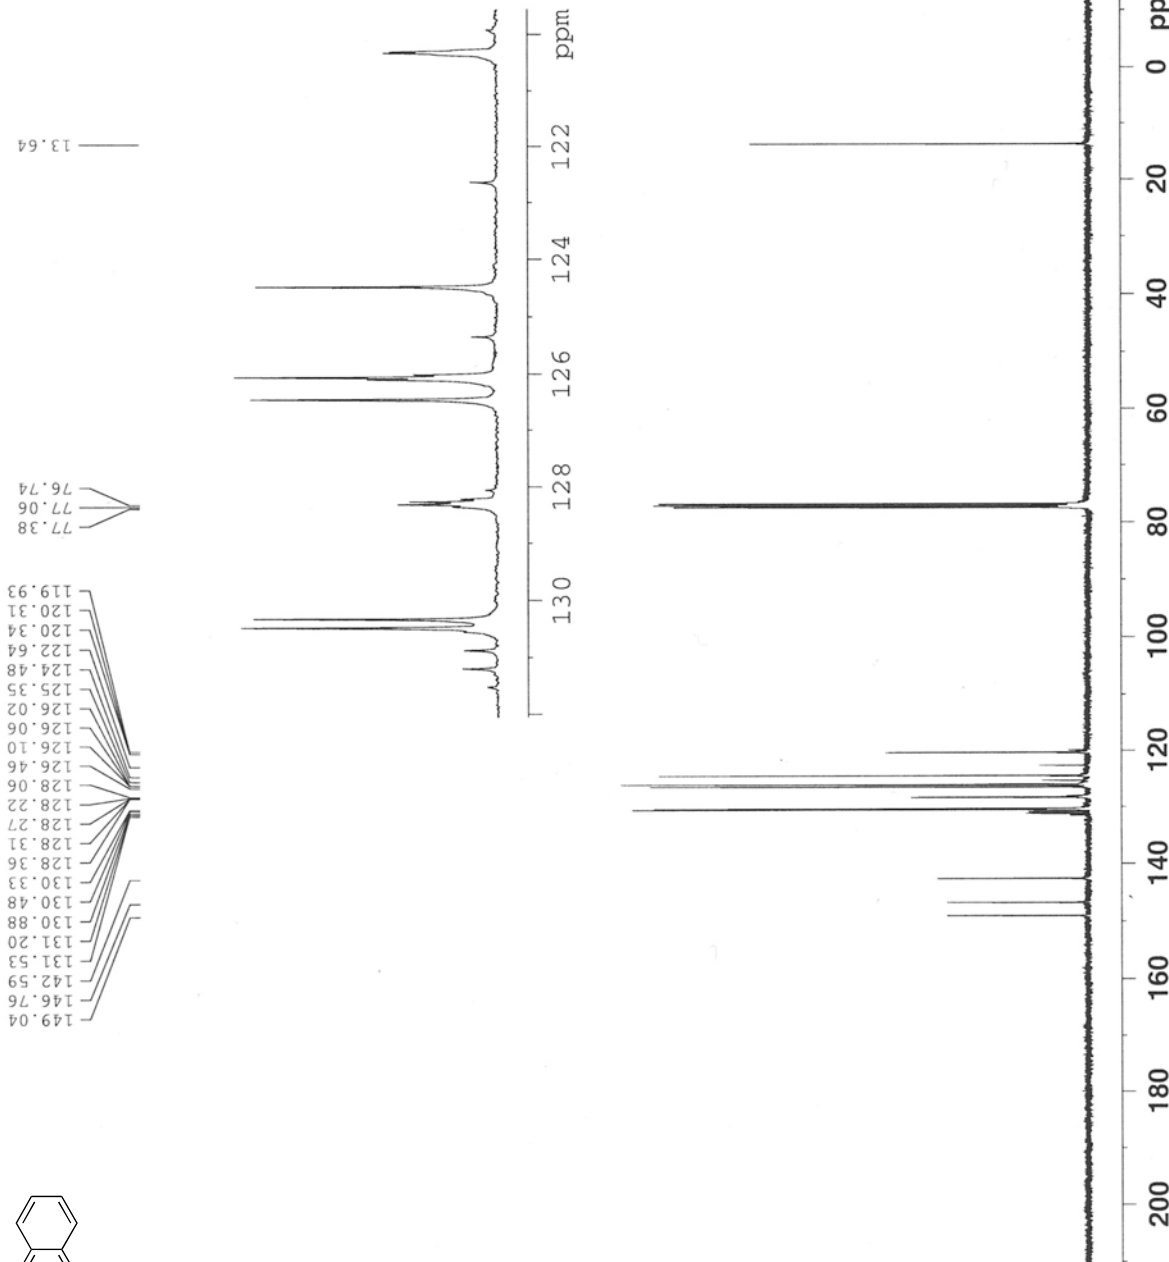

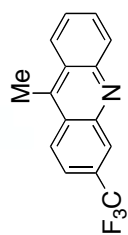

-63.645

150 100 50 0 -50 -100 -150 ppm

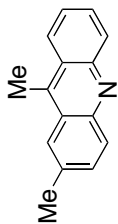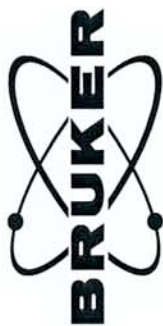

Current Data Parameters  
 NAME 692  
 EXPNO 4  
 PROCNO 1

F2 - Acquisition Parameters  
 Date\_ 20100619  
 Time 11.06  
 INSTRUM spect  
 PROBHD 5 mm QNP 1H/13  
 PULPROG zg30  
 TD 65536  
 SOLVENT CDCl3  
 NS 6  
 DS 2  
 SWH 8278.146 Hz  
 FIDRES 0.126314 Hz  
 AQ 3.9584243 sec  
 RG 128  
 DW 60.400 usec  
 DE 6.00 usec  
 TE 294.2 K  
 D1 1.00000000 sec  
 TD0 1

===== CHANNEL f1 =====  
 NUC1 1H  
 P1 14.00 usec  
 PL1 0.00 dB  
 SFO1 400.1324710 MHz

F2 - Processing parameters  
 SI 65536  
 SF 400.1300174 MHz  
 WDW EM  
 SSB 0  
 LB 0.30 Hz  
 GB 0  
 PC 1.00

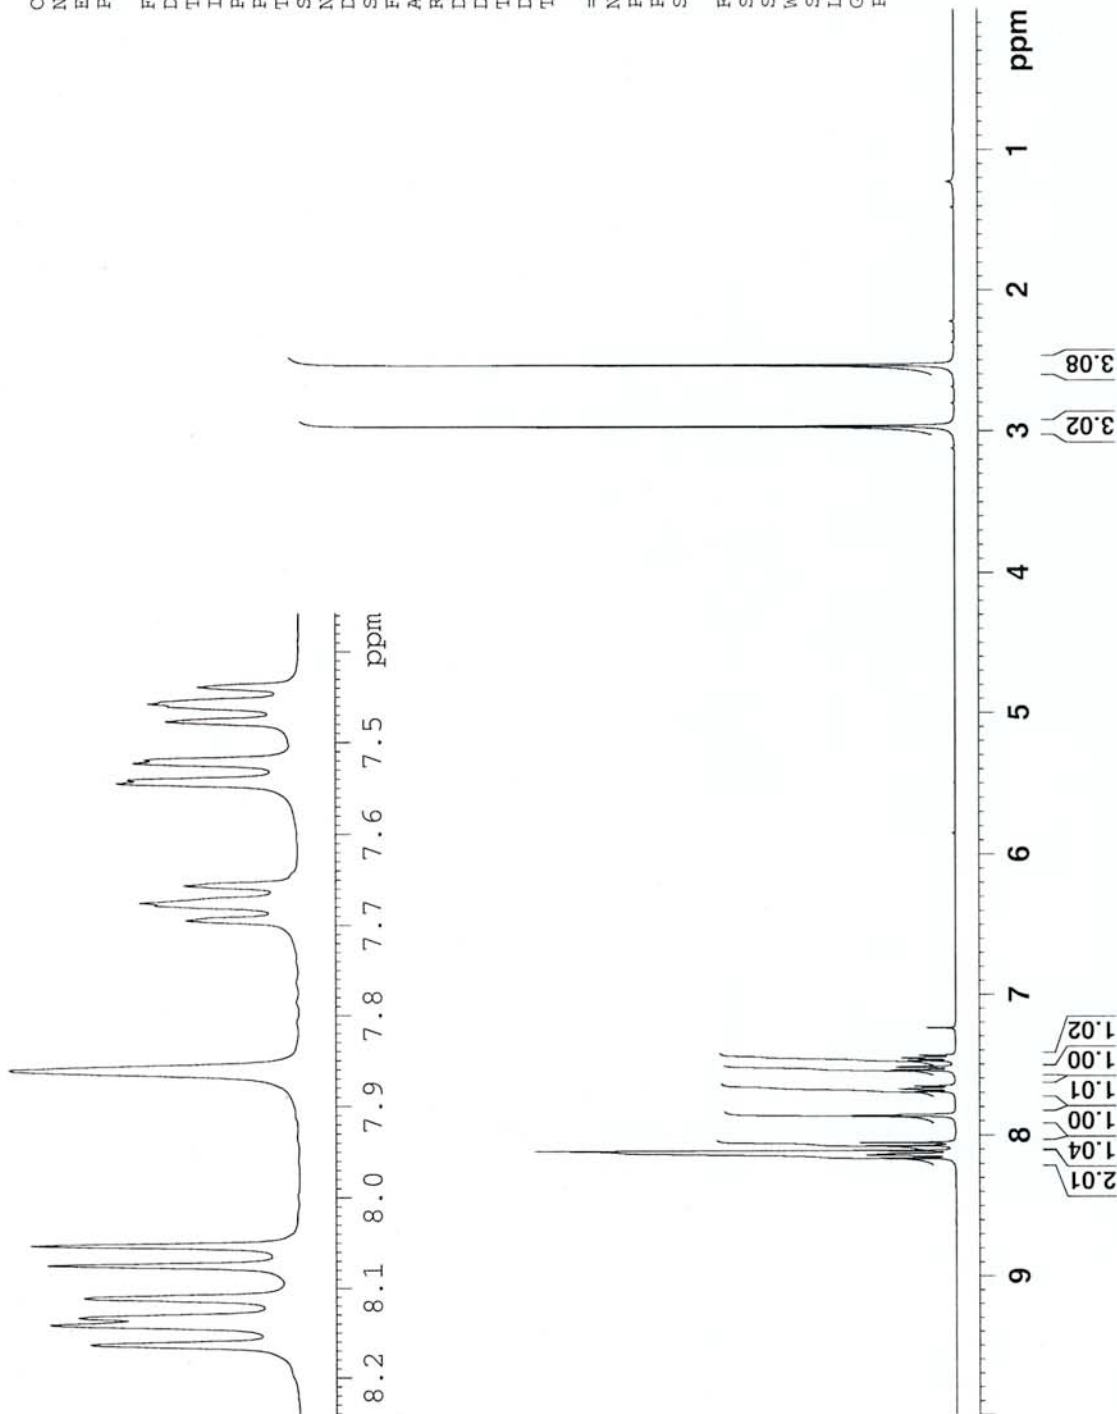

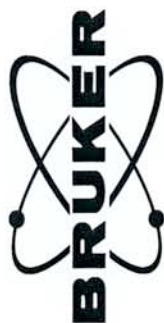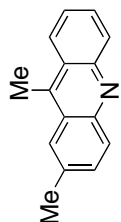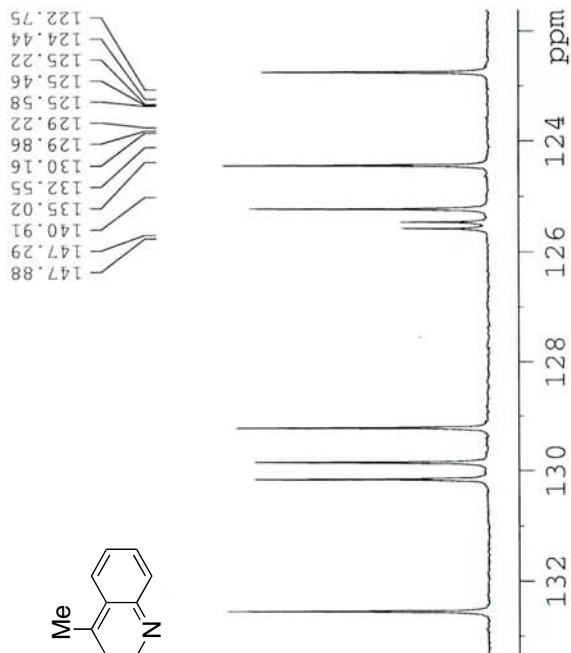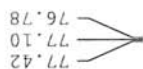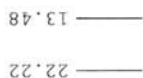

Current Data Parameters  
NAME 692  
EXPNO 5  
PROCNO 1

F2 - Acquisition Parameters  
Date\_ 20100619  
Time 12.37  
INSTRUM spect  
PROBHD 5 mm QNP 1H/13  
PULPROG zgpg30  
TD 65536  
SOLVENT CDCl3  
NS 1491  
DS 4  
SWH 23980.814 Hz  
FIDRES 0.365918 Hz  
AQ 1.3664756 sec  
RG 1824.6  
DW 20.850 usec  
DE 6.00 usec  
TE 295.2 K  
D1 2.0000000 sec  
d11 0.0300000 sec  
DELTA 1.8999999 sec  
TD0 1

==== CHANNEL f1 =====  
NUC1 13C  
P1 9.38 usec  
PL1 0.00 dB  
SFO1 100.6228298 MHz

==== CHANNEL f2 =====  
CPDPRG2 waltz16  
NUC2 1H  
PCPD2 90.00 usec  
PL2 0.00 dB  
PL12 16.10 dB  
PL13 19.00 dB  
SFO2 400.1316005 MHz

F2 - Processing parameters  
SI 32768  
SF 100.6127690 MHz  
WDW EM  
SSB 0  
LB 1.00 Hz  
GB 0  
PC 6.00

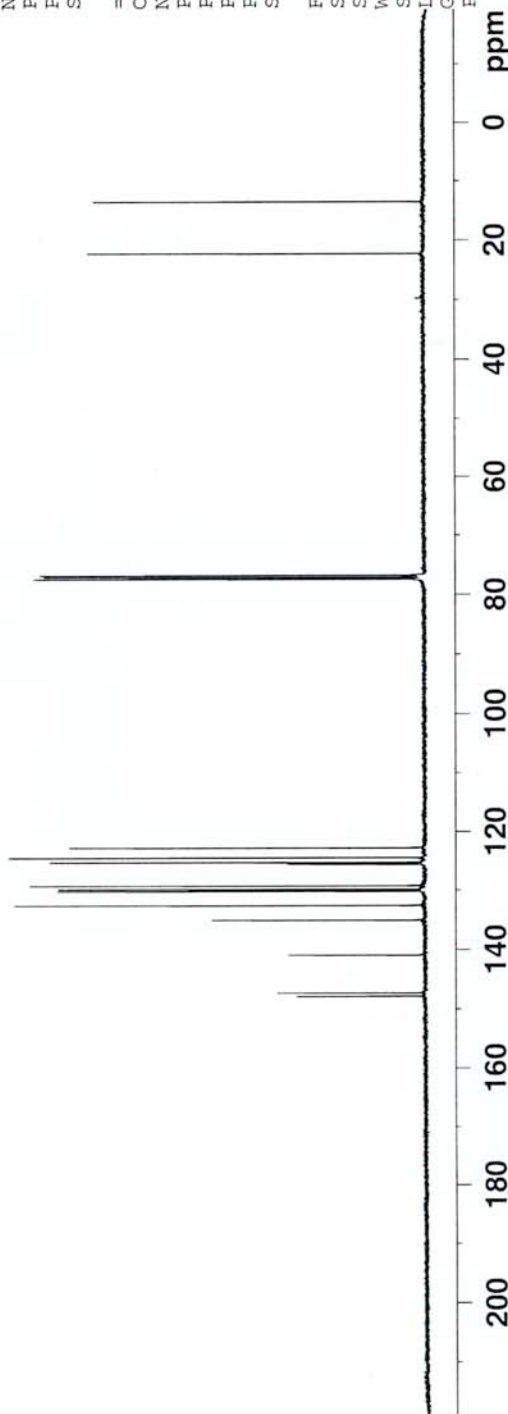

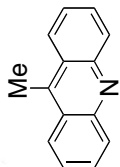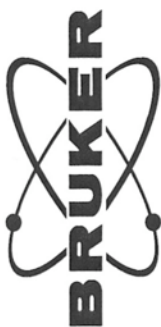

Current Data Parameters  
 NAME 9-methylacridine  
 EXPNO 2  
 PROCNO 1

F2 - Acquisition Parameters  
 Date\_ 20100612  
 Time 10.00  
 INSTRUM spect  
 PROBHD 5 mm QNP 1H/13  
 PULPROG zg30  
 TD 65536  
 SOLVENT CDCl3  
 NS 6  
 DS 2  
 SWH 8278.146 Hz  
 FIDRES 0.126314 Hz  
 AQ 3.9584243 sec  
 RG 143.7  
 DW 60.400 usec  
 DE 6.00 usec  
 TE 294.2 K  
 D1 1.00000000 sec  
 TD0 1

===== CHANNEL f1 =====  
 NUC1 1H  
 P1 14.00 usec  
 PL1 0.00 dB  
 SF01 400.1324710 MHz

F2 - Processing parameters  
 SI 65536  
 SF 400.1300220 MHz  
 WDW EM  
 SSB 0  
 LB 0.30 Hz  
 GB 0  
 PC 1.00

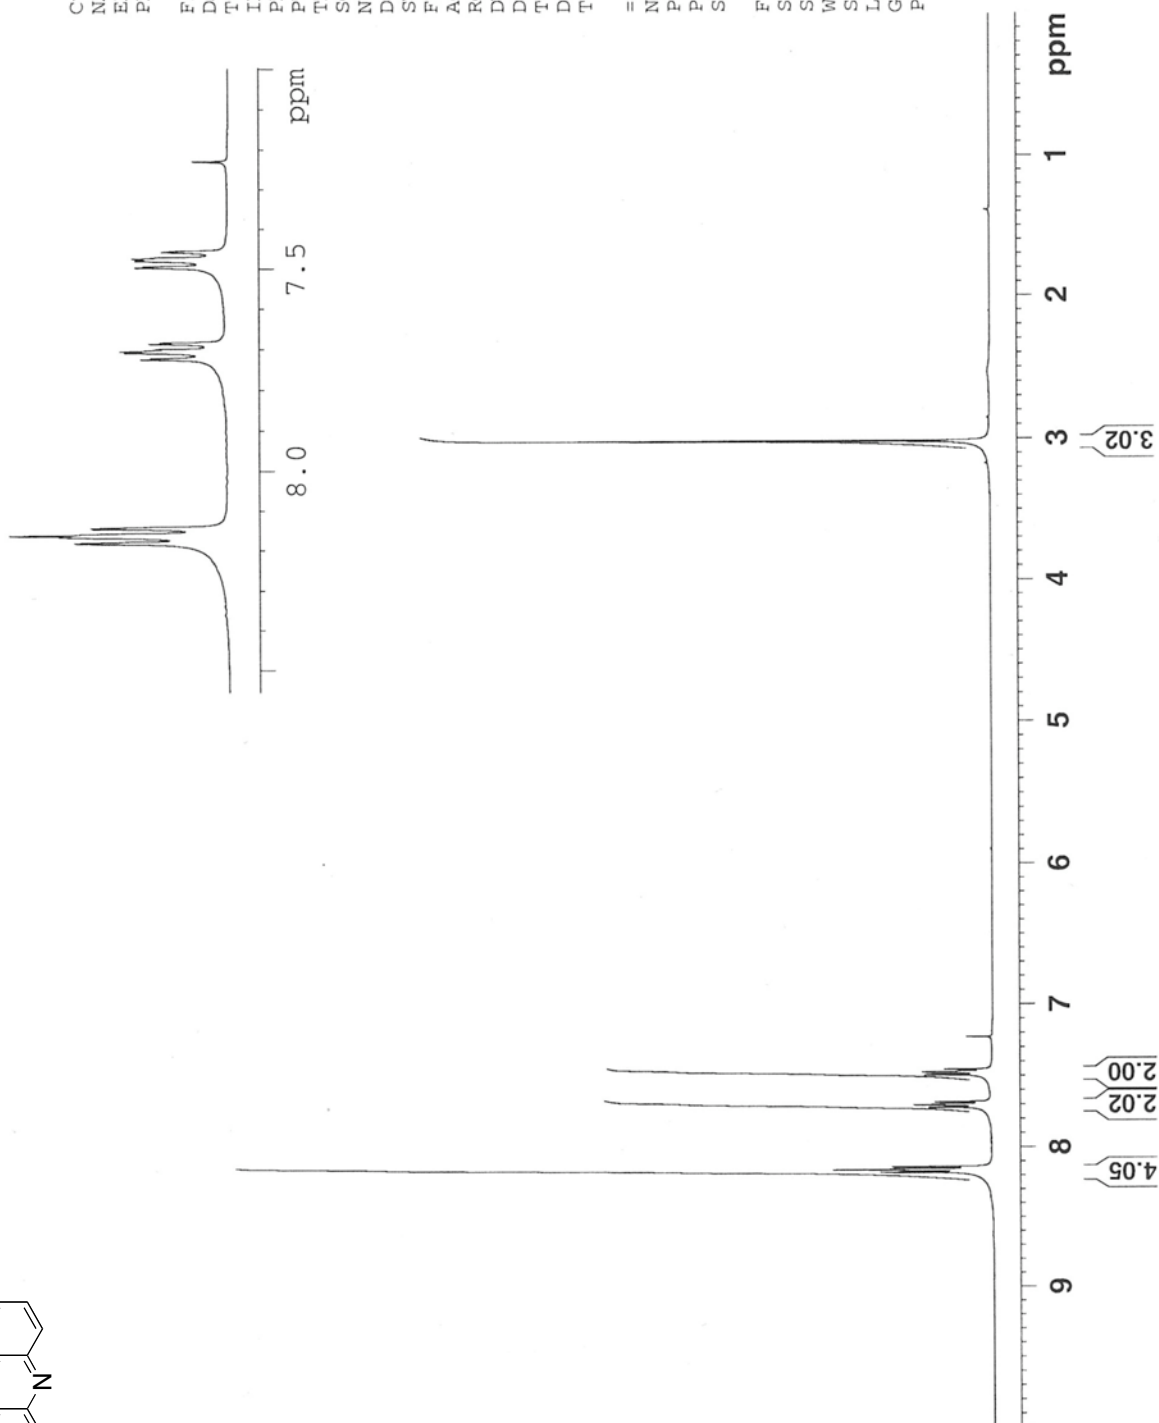

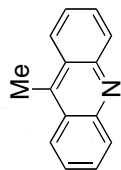

148.39  
142.26  
130.19  
129.75  
125.50  
125.37  
124.54

77.41  
77.09  
76.78

13.61

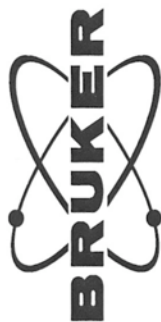

Current Data Parameters  
NAME 9-methylacridine  
EXPNO 3  
PROCNO 1

F2 - Acquisition Parameters  
Date\_ 20100612  
Time 10.07  
INSTRUM spect  
PROBHD 5 mm QNP 1H/13  
PULPROG zgpg30  
TD 65536  
SOLVENT CDCl3  
NS 57  
DS 4  
SWH 23980.814 Hz  
FIDRES 0.365918 Hz  
AQ 1.3664756 sec  
RG 1824.6  
DW 20.850 usec  
DE 6.00 usec  
TE 295.2 K  
D1 2.00000000 sec  
d11 0.03000000 sec  
DELTA 1.89999998 sec  
TD0 1

===== CHANNEL f1 =====  
NUC1 13C  
P1 9.38 usec  
PL1 0.00 dB  
SFO1 100.6228298 MHz

===== CHANNEL f2 =====  
CPDPRG2 waltz16  
NUC2 1H  
PCPD2 90.00 usec  
PL2 0.00 dB  
PL12 16.10 dB  
PL13 19.00 dB  
SFO2 400.1316005 MHz

F2 - Processing parameters  
SI 32768  
SF 100.6127690 MHz  
WDW EM  
SSB 0  
LB 1.00 Hz  
GB 0  
PC 1.40

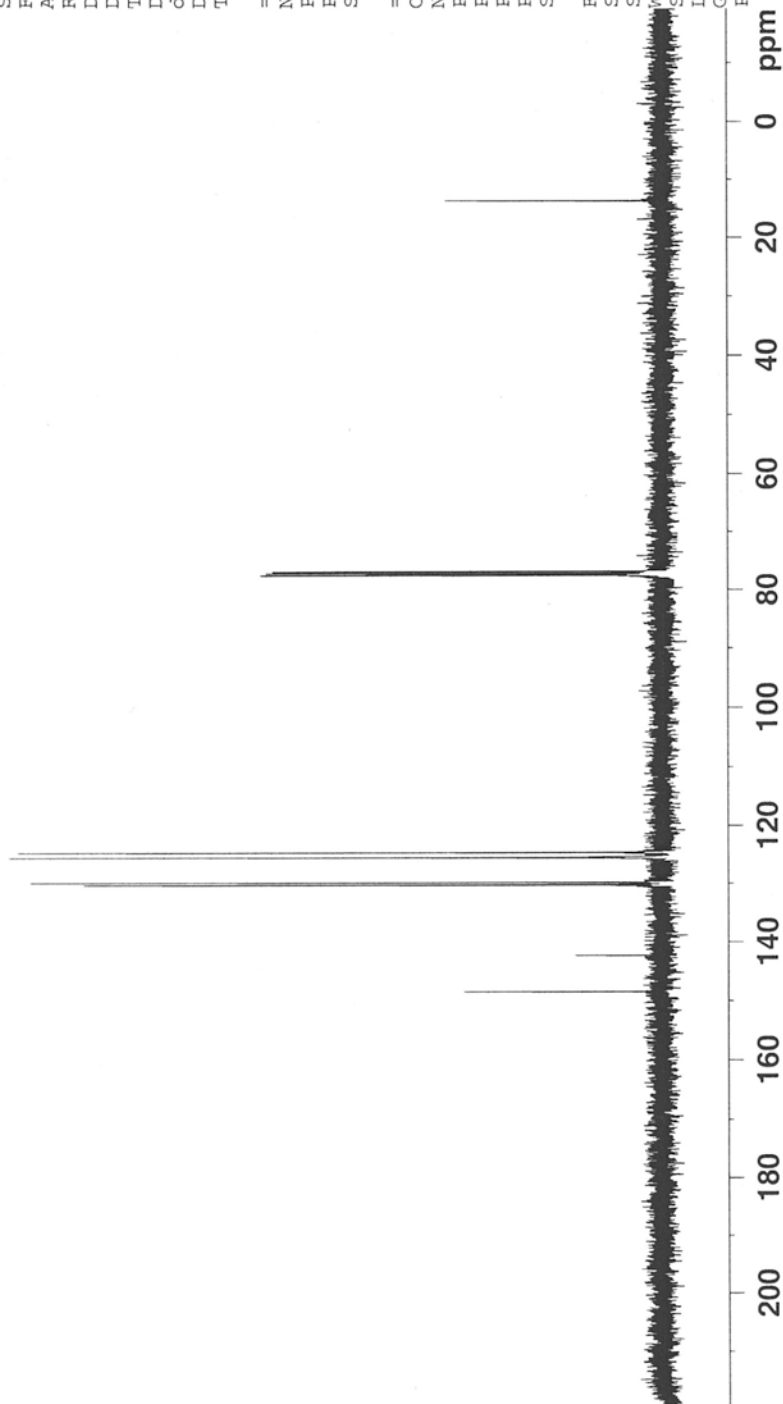

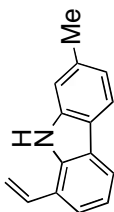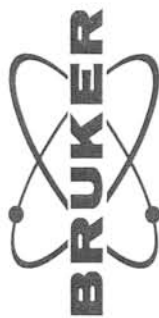

Current Data Parameters  
 NAME 696  
 EXPNO 1  
 PROCNO 1

F2 - Acquisition Parameters  
 Date\_ 20100630  
 Time 6.19  
 INSTRUM spect  
 PROBHD 5 mm QNP 1H/13  
 PULPROG zg30  
 TD 65536  
 SOLVENT CDCl3  
 NS 12  
 DS 2  
 SWH 8278.146 Hz  
 FIDRES 0.126314 Hz  
 AQ 3.9584243 sec  
 RG 256  
 DW 60.400 usec  
 DE 6.00 usec  
 TE 294.2 K  
 D1 1.00000000 sec  
 TD0 1

===== CHANNEL f1 =====  
 NUC1 1H  
 P1 14.00 usec  
 PL1 0.00 dB  
 SFO1 400.1324710 MHz

F2 - Processing parameters  
 SI 65536  
 SF 400.1300220 MHz  
 WDW EM  
 SSB 0  
 LB 0.30 Hz  
 GB 0  
 PC 1.00

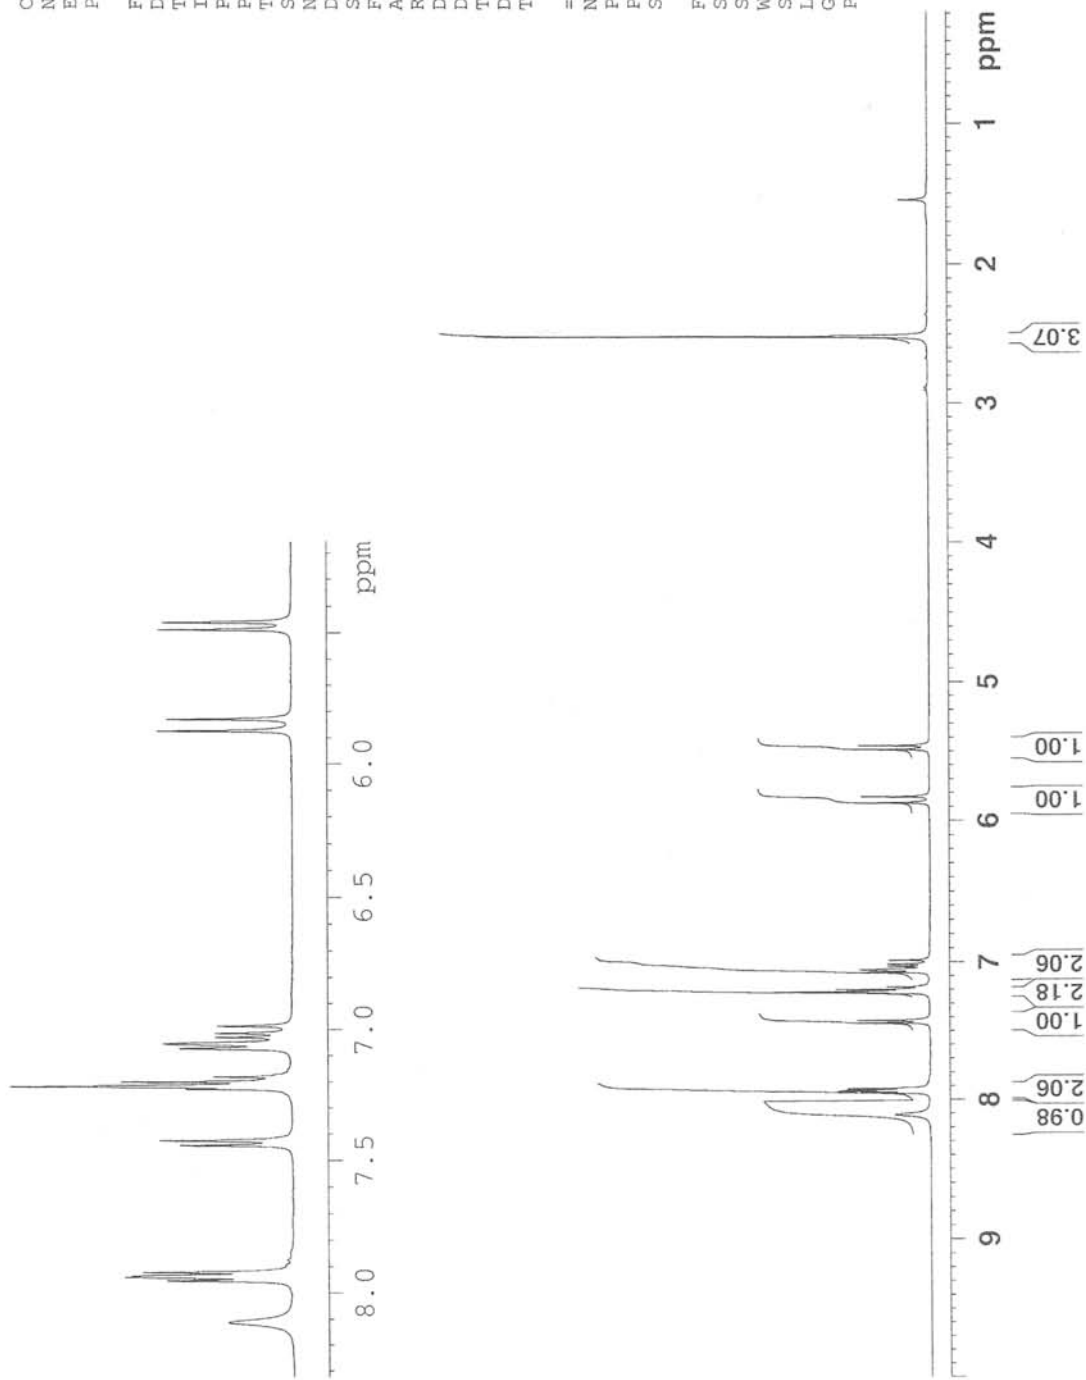

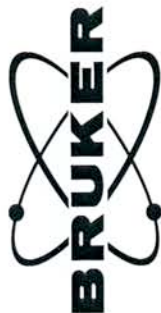

Current Data Parameters  
 NAME 696  
 EXPNO 6  
 PROCNO 1

F2 - Acquisition Parameters  
 Date\_ 20100630  
 Time 18.14  
 INSTRUM spect  
 PROBHD 5 mm QNP 1H/13  
 PULPROG zgpg30  
 TD 65536  
 SOLVENT CDCl3  
 NS 110  
 DS 4  
 SWH 23980.814 Hz  
 FIDRES 0.365918 Hz  
 AQ 1.3664756 sec  
 RG 4597.6  
 DW 20.850 usec  
 DE 6.00 usec  
 TE 296.2 K  
 D1 2.0000000 sec  
 d11 0.0300000 sec  
 DELTA 1.89999998 sec  
 TD0 1

===== CHANNEL f1 =====  
 NUC1 13C  
 P1 9.38 usec  
 PL1 0.00 dB  
 SFO1 100.6228298 MHz

===== CHANNEL f2 =====  
 CPDPRG2 waltz16  
 NUC2 1H  
 PCPD2 90.00 usec  
 PL2 0.00 dB  
 PL12 16.10 dB  
 PL13 19.00 dB  
 SFO2 400.1316005 MHz

F2 - Processing parameters  
 SI 32768  
 SF 100.6127690 MHz  
 EM 0  
 SSB 0  
 LB 1.00 Hz  
 GB 0  
 PC 1.40

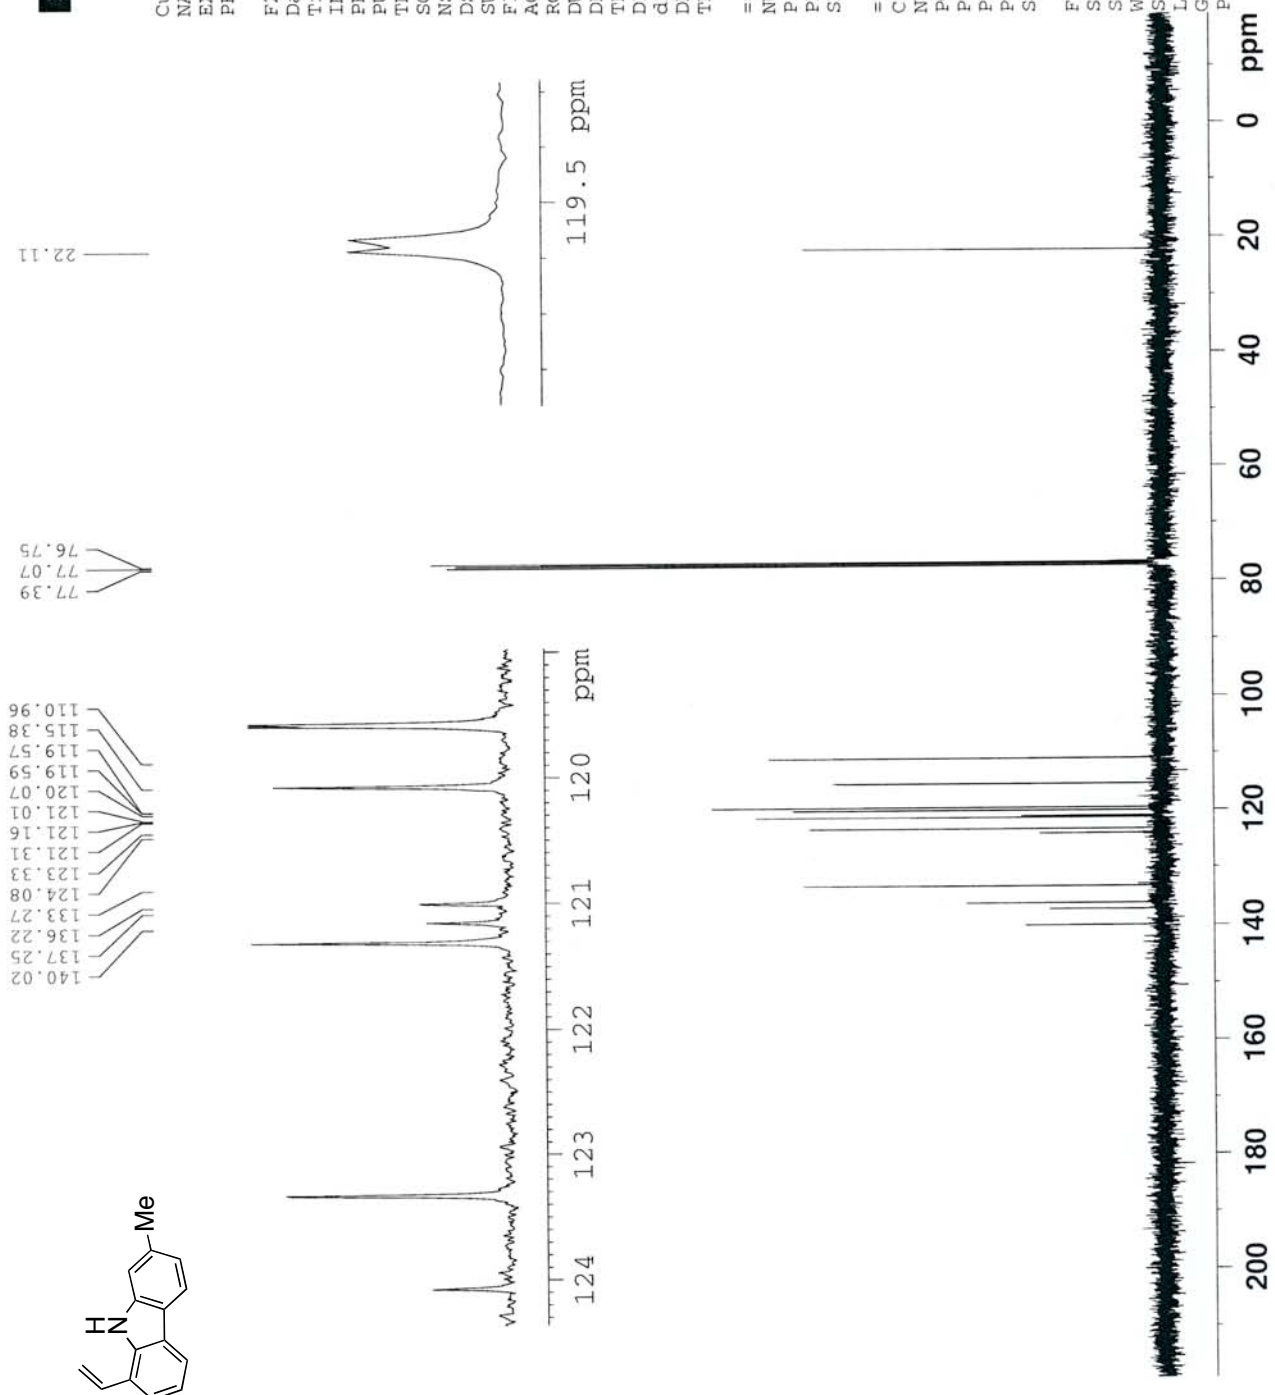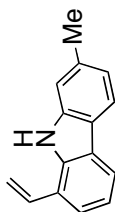

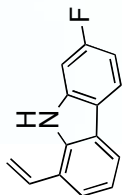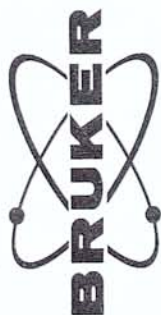

Current Data Parameters  
 NAME 656  
 EXPNO 4  
 PROCNO 1

F2 - Acquisition Parameters  
 Date\_ 20100514  
 Time 14.12  
 INSTRUM spect  
 PROBD 5 mm QNP 1H/13  
 PULPROG zg30  
 TD 65536  
 SOLVENT CDCl3  
 NS 17  
 DS 2  
 SWH 8278.146 Hz  
 FIDRES 0.126314 Hz  
 AQ 3.9584243 sec  
 RG 161.3  
 DW 60.400 usec  
 DE 6.00 usec  
 TE 294.2 K  
 D1 1.00000000 sec  
 TD0 1

==== CHANNEL f1 =====  
 NUC1 1H  
 P1 14.00 usec  
 PL1 0.00 dB  
 SFO1 400.1324710 MHz

F2 - Processing parameters  
 SI 65536  
 SF 400.1300220 MHz  
 WDW EM  
 SSB 0  
 LB 0.30 Hz  
 GB 0  
 PC 1.00

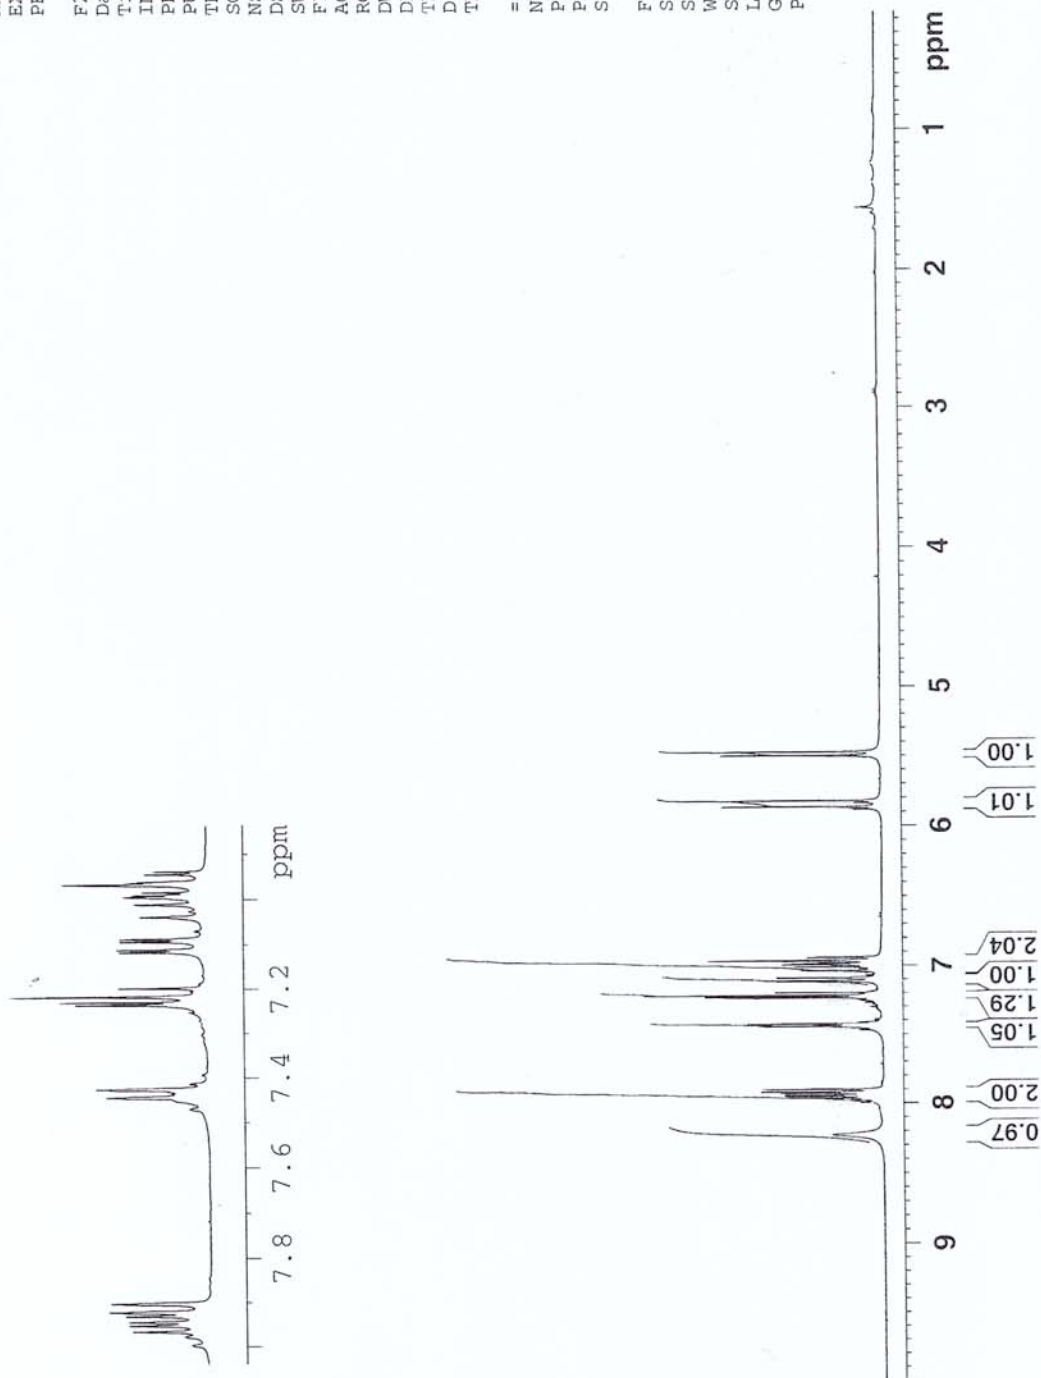

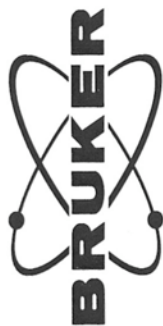

Current Data Parameters  
NAME 656-1  
EXPNO 2  
PROCNO 1

F2 - Acquisition Parameters  
Date\_ 20100515  
Time 9.22  
INSTRUM spect  
PROBHD 5 mm QNP 1H/13  
PULPROG zgpg30  
TD 65536  
SOLVENT CDCl3  
NS 1167  
DS 4  
SWH 23980.814 Hz  
FIDRES 0.365918 Hz  
AQ 1.3664756 sec  
RG 1824.6  
DW 20.850 usec  
DE 6.00 usec  
TE 295.2 K  
D1 2.00000000 sec  
d11 0.03000000 sec  
DELTA 1.89999998 sec  
TD0 1

===== CHANNEL f1 =====  
NUC1 13C  
P1 9.38 usec  
PL1 0.00 dB  
SFO1 100.6228298 MHz

===== CHANNEL f2 =====  
CPDPRG2 waltz16  
NUC2 1H  
PCPD2 90.00 usec  
PL2 0.00 dB  
PL12 16.10 dB  
PL13 19.00 dB  
SFO2 400.1316005 MHz

F2 - Processing parameters  
SI 32768  
SF 100.6127690 MHz  
WDW EM  
SSB 0  
LB 1.00 Hz  
GB 0  
PC 1.40

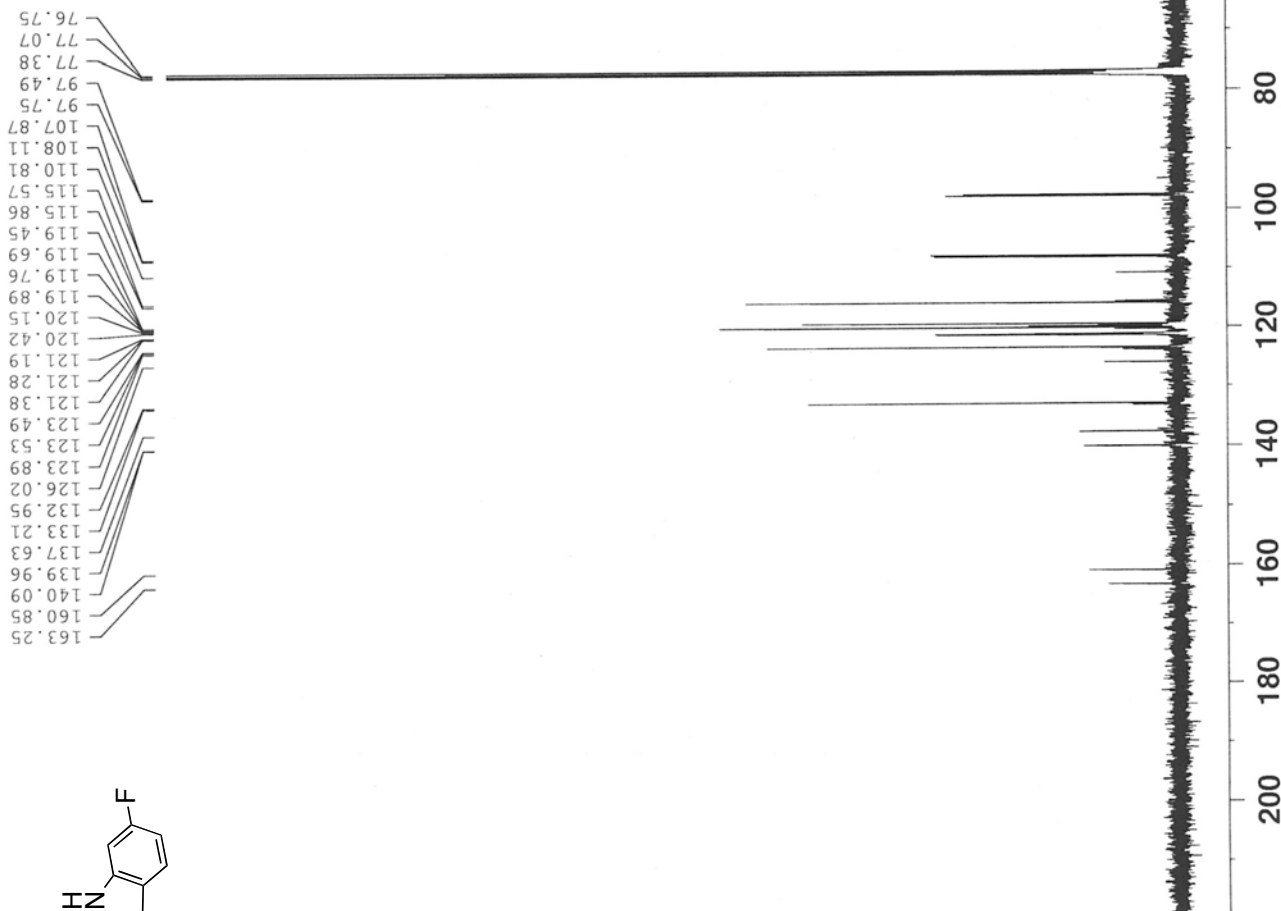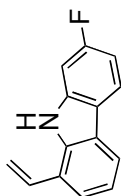

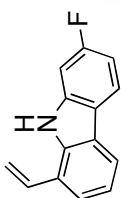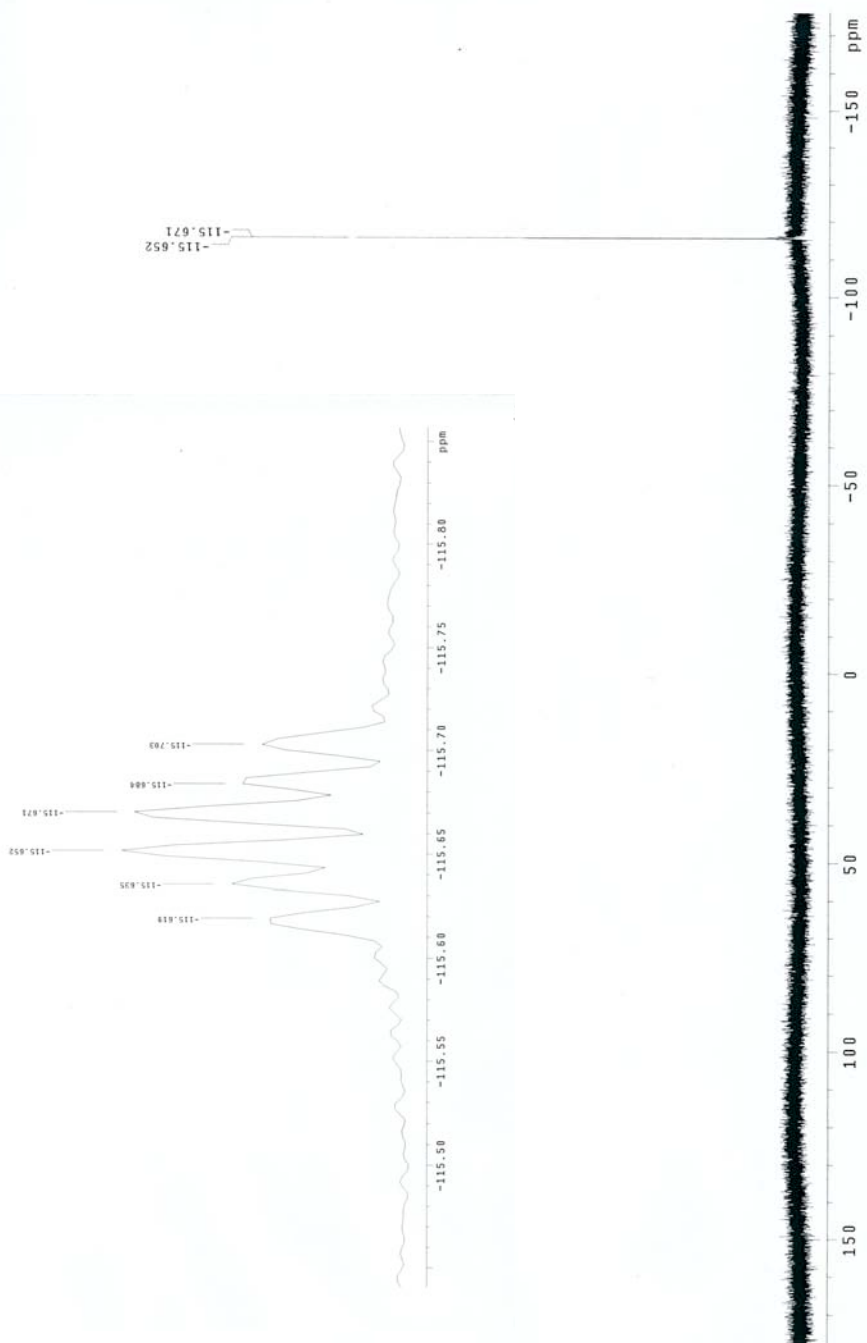

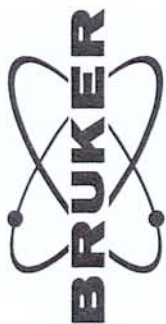

Current Data Parameters  
 NAME 676-1  
 EXPNO 1  
 PROCNO 1

F2 - Acquisition Parameters  
 Date\_ 20100527  
 Time 7.07  
 INSTRUM spect  
 PROBHD 5 mm QNP 1H/13  
 PULPROG zg30  
 TD 65536  
 SOLVENT CDCl3  
 NS 59  
 DS 2  
 SWH 8278.146 Hz  
 FIDRES 0.126314 Hz  
 AQ 3.9584243 sec  
 RG 322.5  
 DW 60.400 usec  
 DE 6.00 usec  
 TE 294.2 K  
 D1 1.00000000 sec  
 TD0 1

===== CHANNEL f1 =====  
 NUC1 1H  
 P1 14.00 usec  
 PL1 0.00 dB  
 SFO1 400.1324710 MHz

F2 - Processing parameters  
 SI 65536  
 SF 400.1300220 MHz  
 WDW EM  
 SSB 0  
 LB 0.30 Hz  
 GB 0  
 PC 1.00

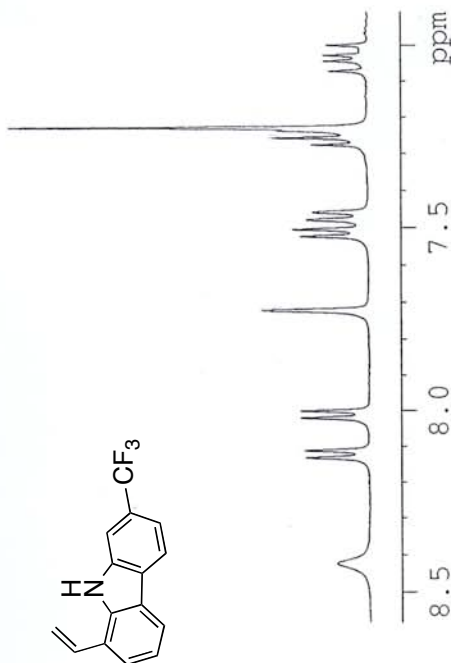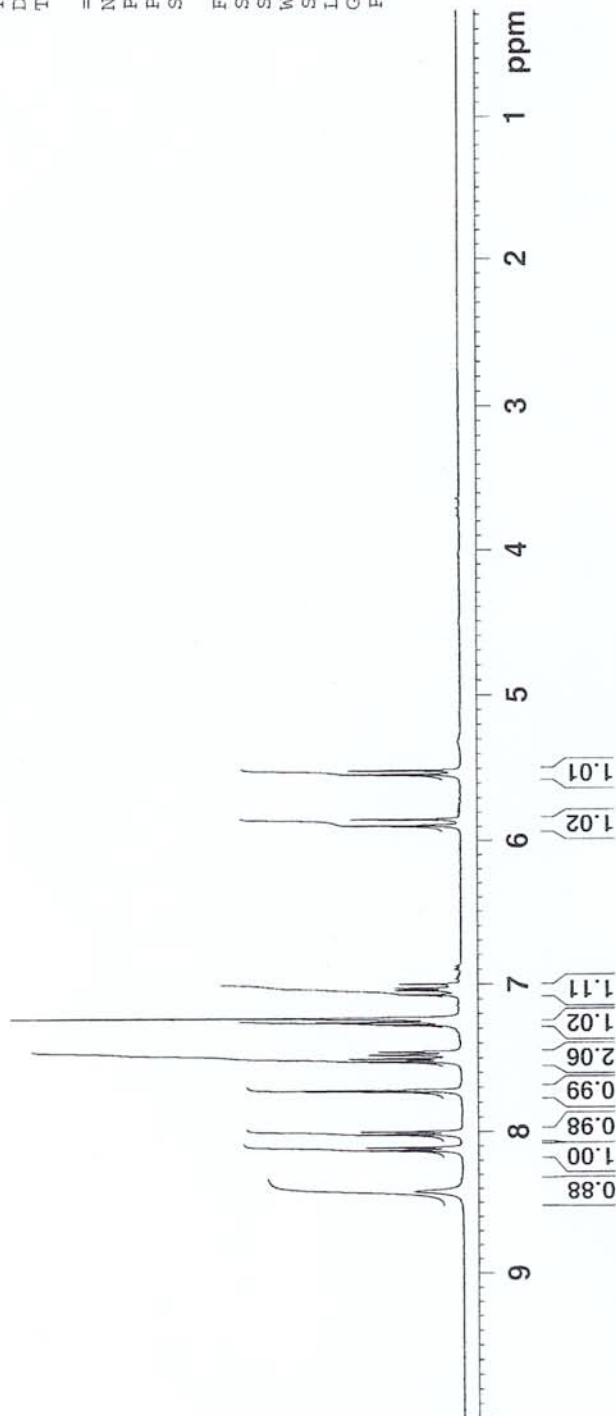

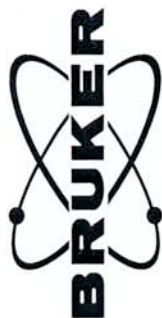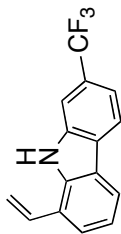

138.56  
138.14  
132.80  
127.96  
127.64  
126.03  
125.06  
122.98  
121.58  
120.70  
120.39  
120.36  
116.51  
116.48  
116.22  
108.16  
108.11

77.35  
77.03  
76.71

29.73

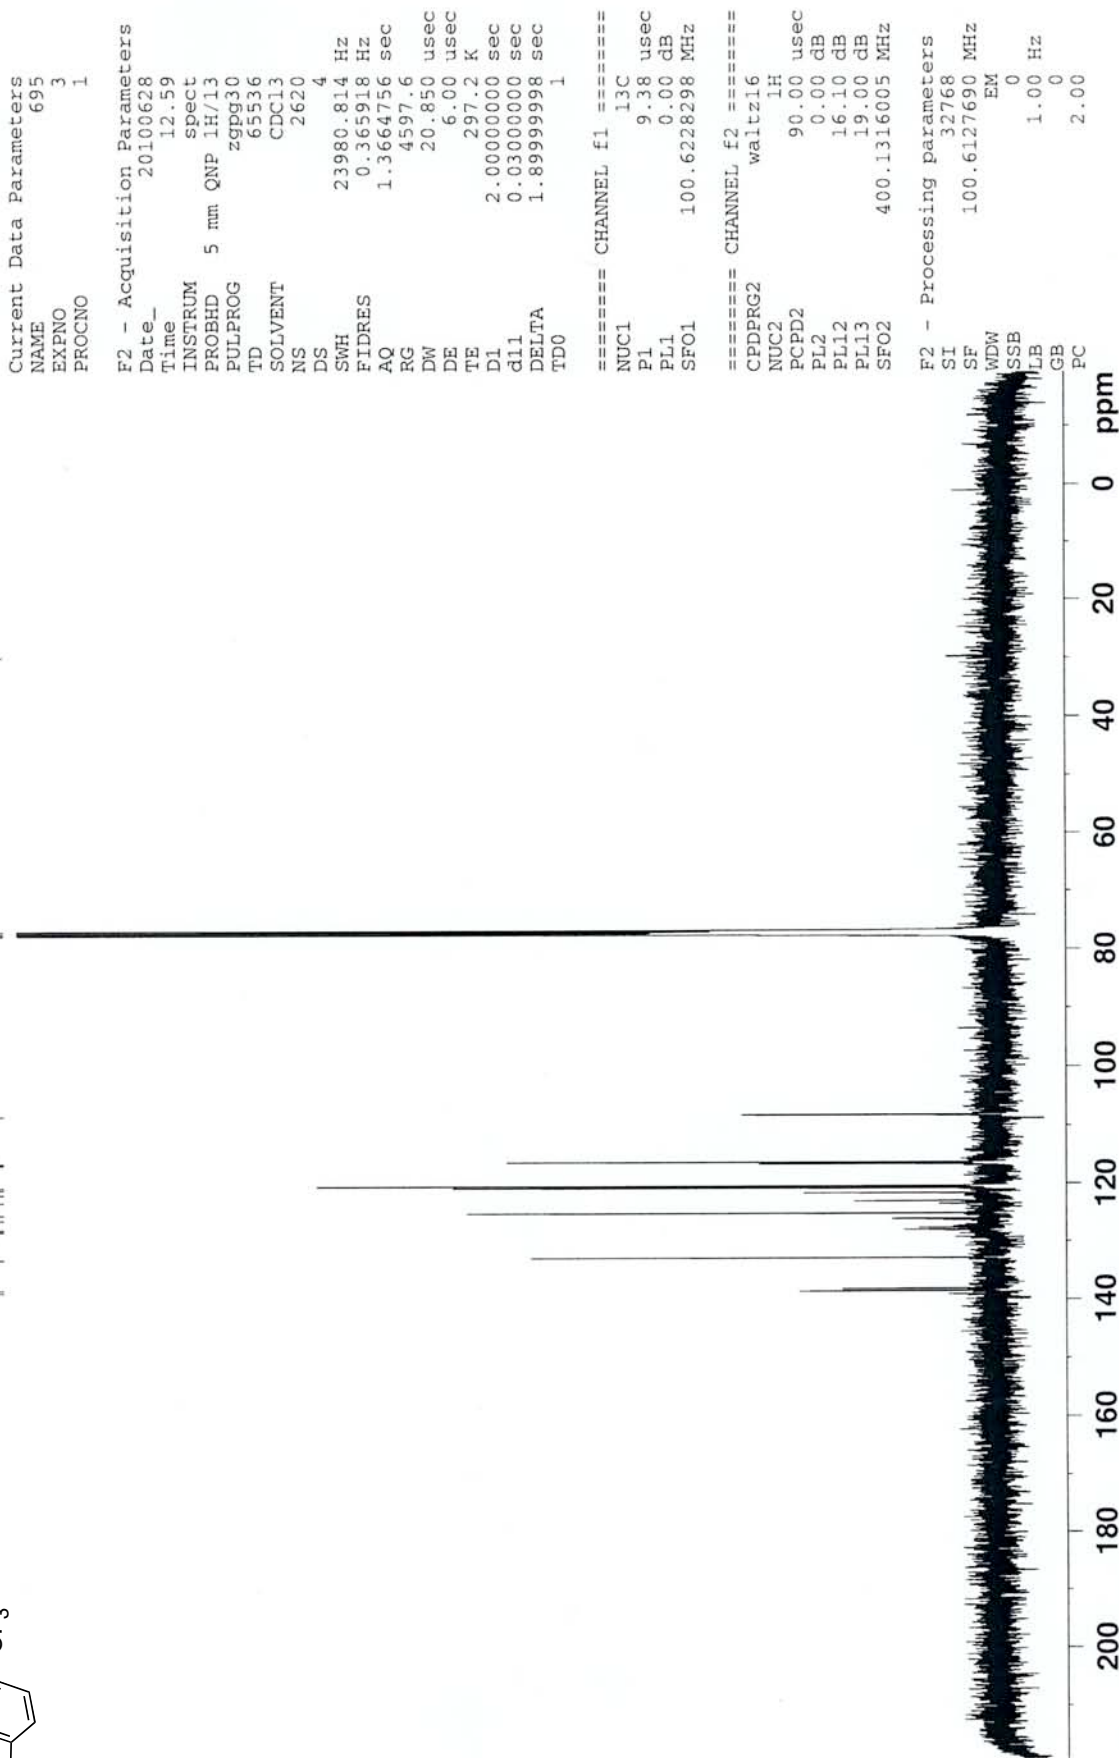

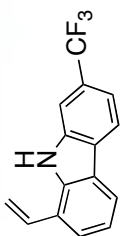

SI-94

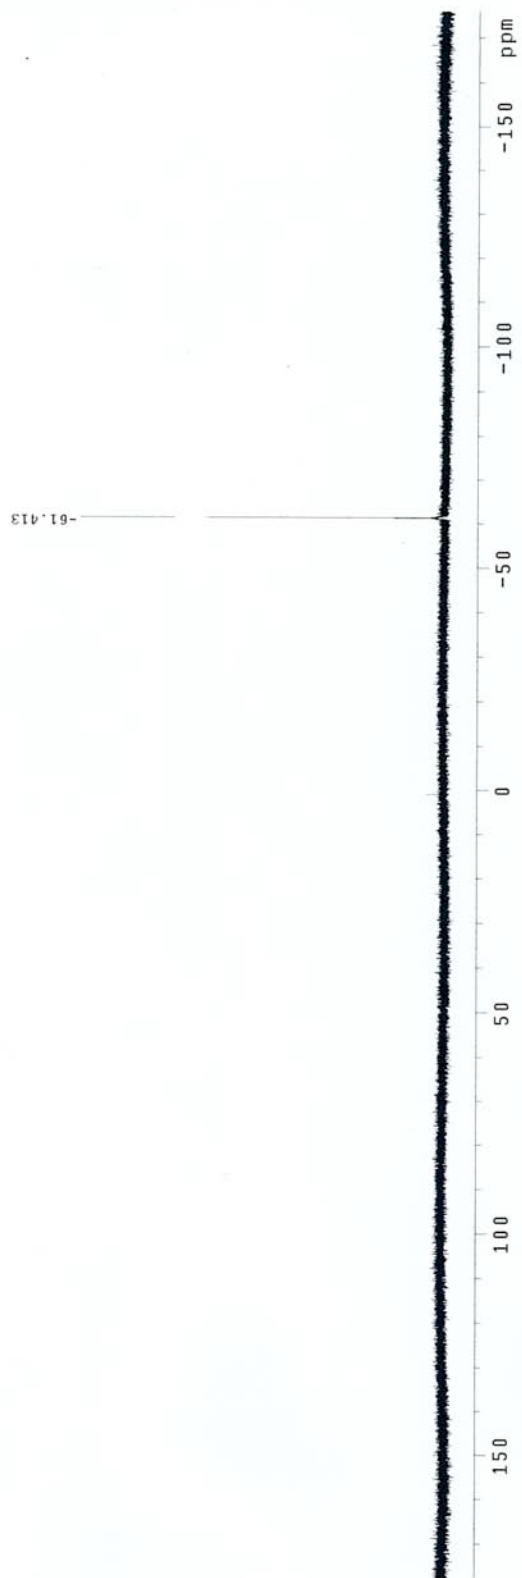

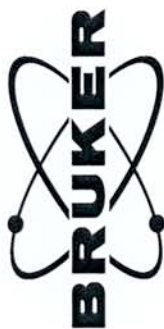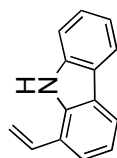

Current Data Parameters  
NAME 677-3  
EXPNO 1  
PROCNO 1

F2 - Acquisition Parameters  
Date\_ 20100603  
Time 7.13  
INSTRUM spect  
PROBHD 5 mm QNP 1H/13  
PULPROG zg30  
TD 65536  
SOLVENT CDCl3  
NS 15  
DS 2  
SWH 8278.146 Hz  
FIDRES 0.126314 Hz  
AQ 3.9584243 sec  
RG 256  
DW 60.400 usec  
DE 6.00 usec  
TE 294.2 K  
D1 1.00000000 sec  
TD0 1

===== CHANNEL f1 =====  
NUC1 1H  
P1 14.00 usec  
PL1 0.00 dB  
SFO1 400.1324710 MHz

F2 - Processing parameters  
SI 65536  
SF 400.1300220 MHz  
WDW EM  
SSB 0  
LB 0.30 Hz  
GB 0  
PC 1.00

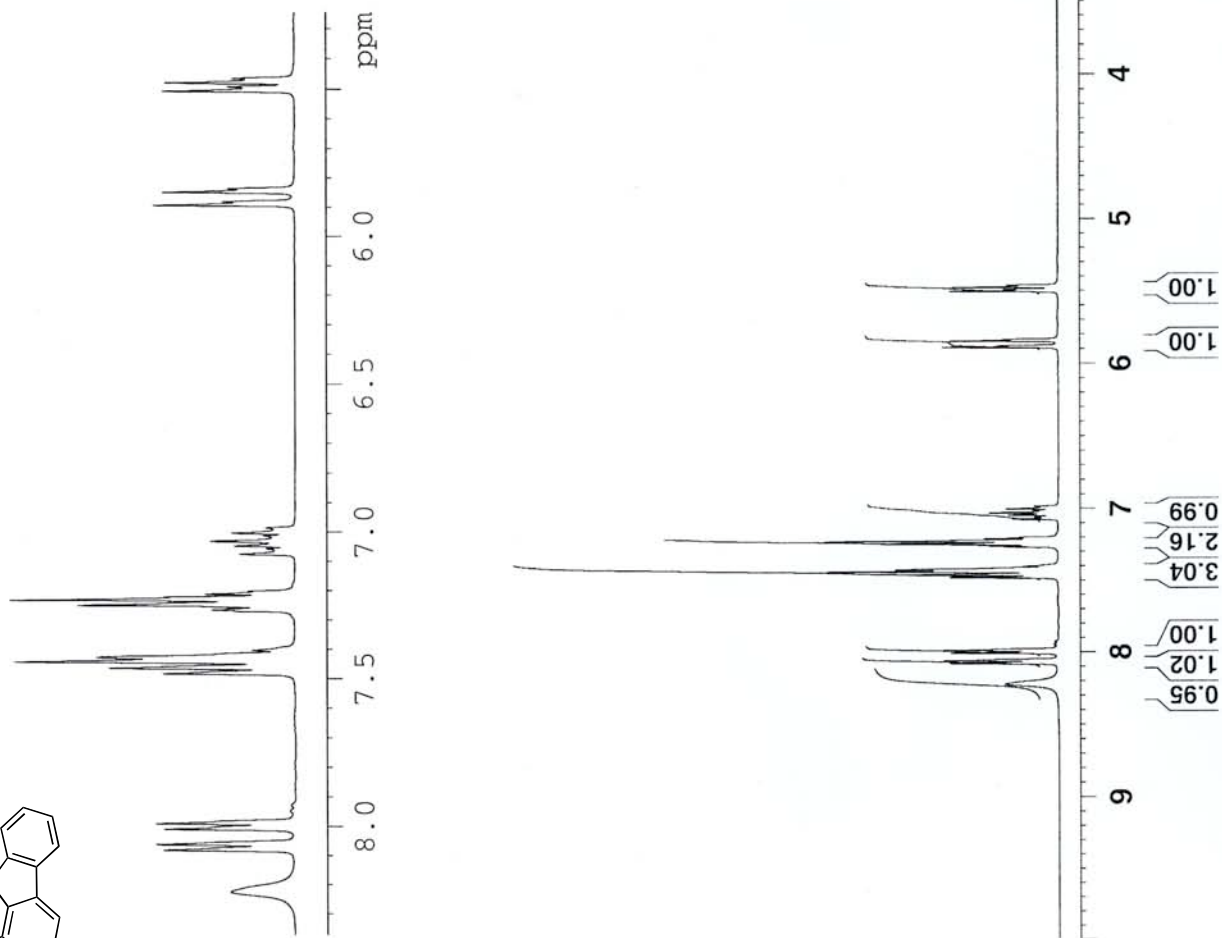

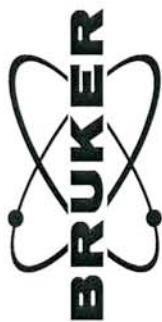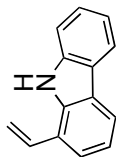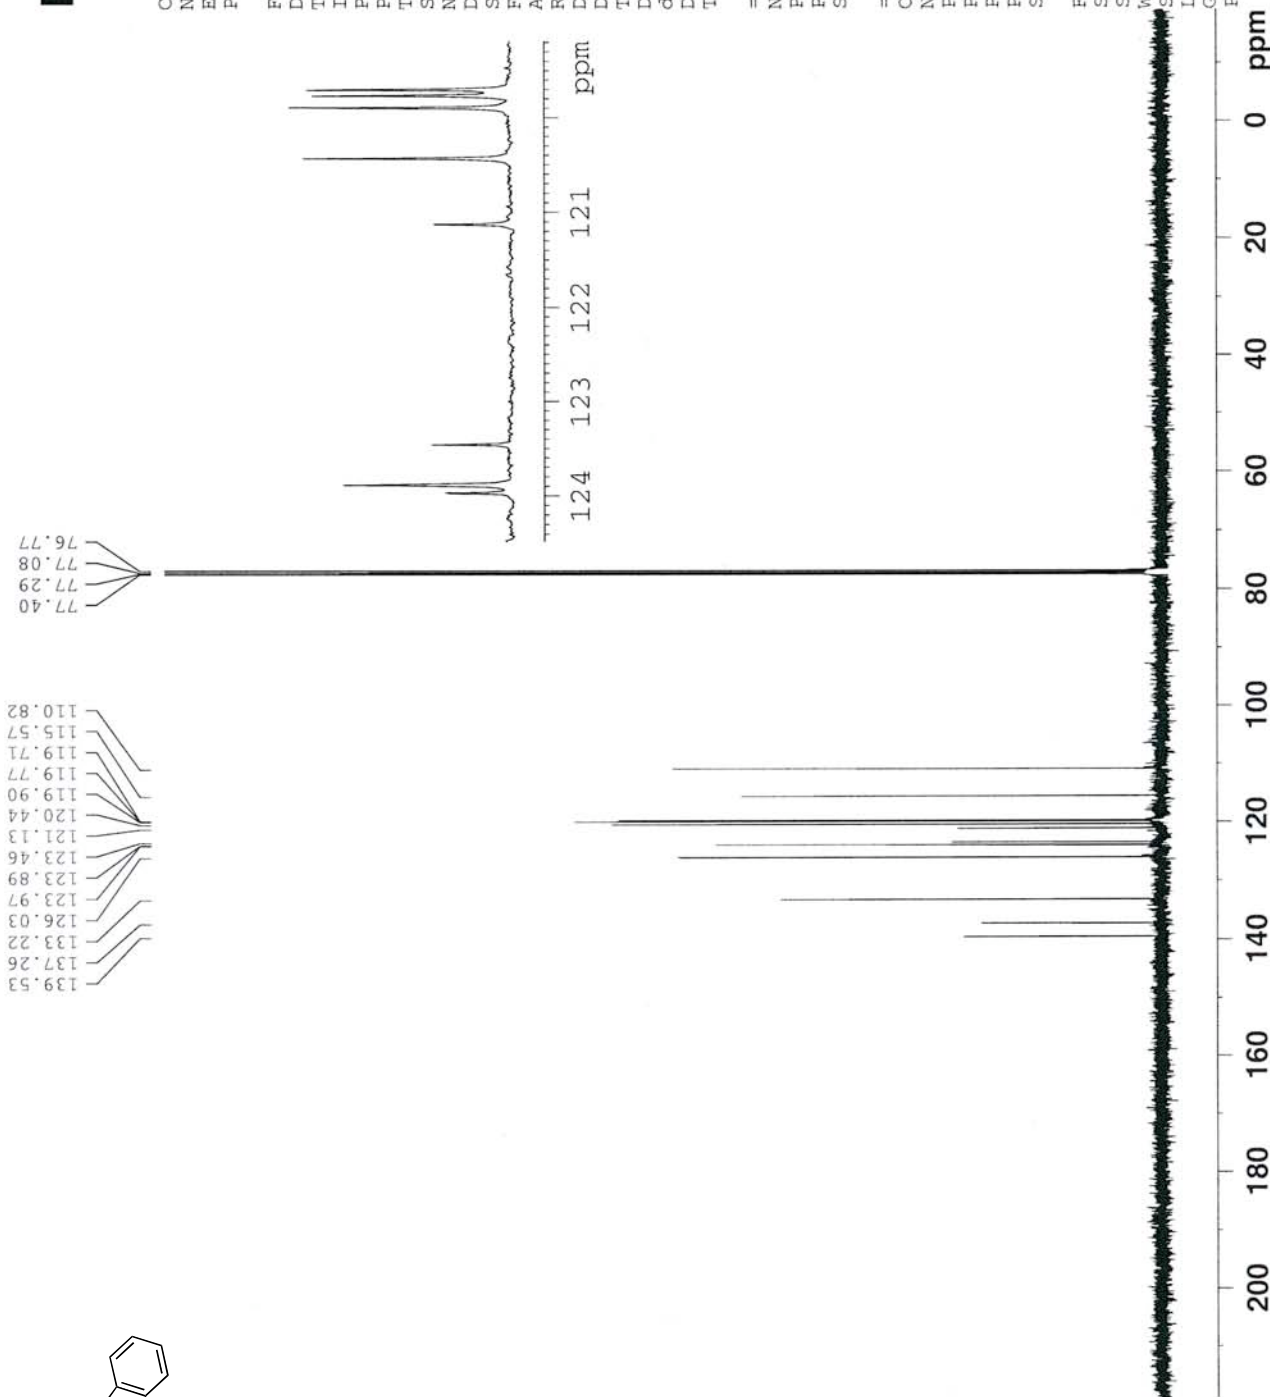

Current Data Parameters  
NAME 677-3  
EXPNO 2  
PROCNO 1

F2 - Acquisition Parameters  
Date\_ 20100603  
Time 7.51  
INSTRUM spect  
PROBHD 5 mm QNP 1H/13  
PULPROG zgpg30  
TD 65536  
SOLVENT CDCl3  
NS 534  
DS 4  
SWH 23980.814 Hz  
FIDRES 0.365918 Hz  
AQ 1.3664756 sec  
RG 1824.6  
DE 20.850 usec  
TE 295.2 K  
D1 2.00000000 sec  
d11 0.03000000 sec  
DELTA 1.89999998 sec  
TD0 1

==== CHANNEL f1 =====  
NUC1 13C  
P1 9.38 usec  
PL1 0.00 dB  
SFO1 100.6228298 MHz

==== CHANNEL f2 =====  
CPDPRG2 waltz16  
NUC2 1H  
PCPD2 90.00 usec  
PL2 0.00 dB  
PL12 16.10 dB  
PL13 19.00 dB  
SFO2 400.1316005 MHz

F2 - Processing parameters  
SI 32768  
SF 100.6127690 MHz  
WDW EM  
SSB 0  
LB 1.00 Hz  
GB 0  
PC 1.40

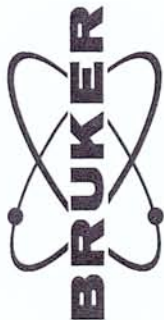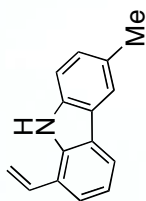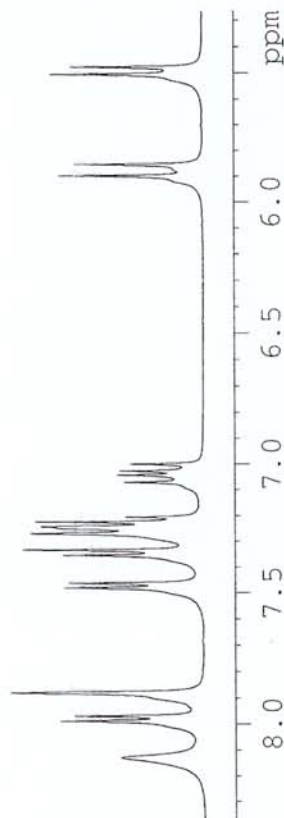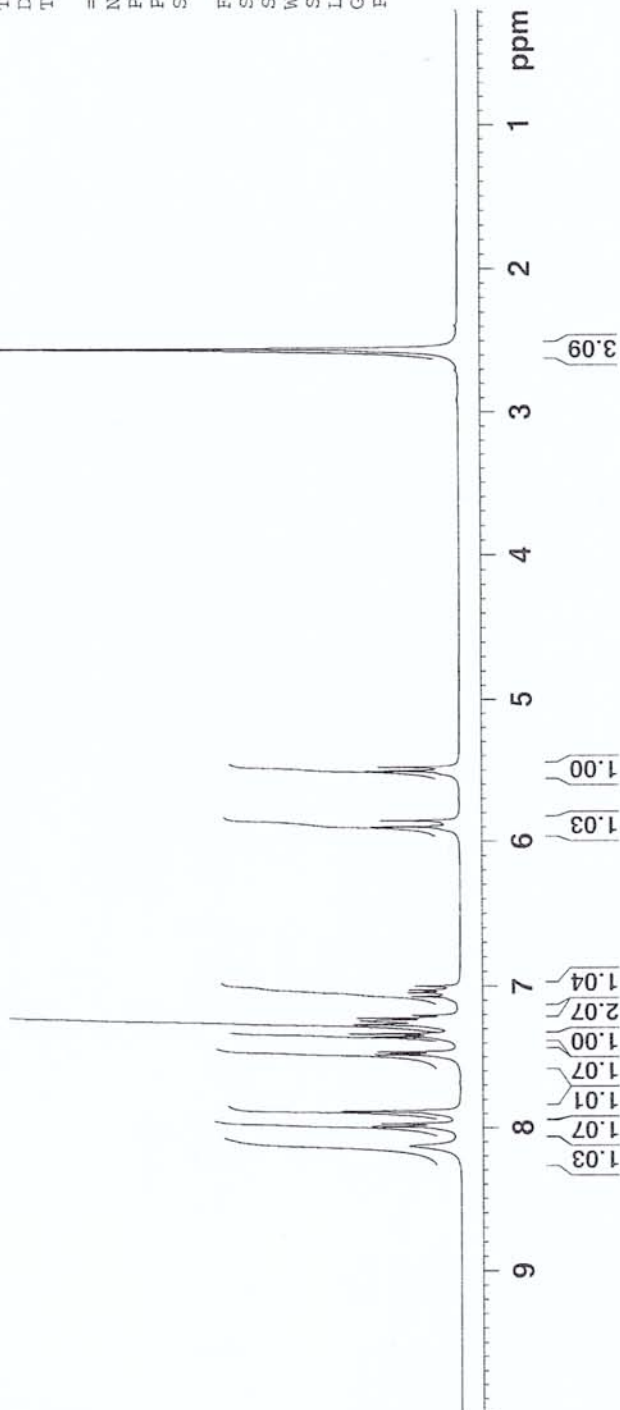

Current Data Parameters  
NAME 658  
EXPNO 1  
PROCNO 1

F2 - Acquisition Parameters  
Date\_ 20100507  
Time 10.00  
INSTRUM spect  
PROBHD 5 mm QNP 1H/13  
PULPROG zg30  
TD 65536  
SOLVENT CDCl3  
NS 16  
DS 2  
SWH 8278.146 Hz  
FIDRES 0.126314 Hz  
AQ 3.9584243 sec  
RG 228.1  
DW 60.400 usec  
DE 6.00 usec  
TE 295.2 K  
D1 1.00000000 sec  
TD0 1

===== CHANNEL f1 =====  
NUC1 1H  
P1 14.00 usec  
PL1 0.00 dB  
SFO1 400.1324710 MHz

F2 - Processing parameters  
SI 65536  
SF 400.1300175 MHz  
WDW EM  
SSB 0  
LB 0.30 Hz  
GB 0  
PC 1.00

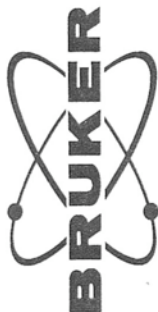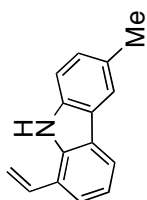

137.79  
137.62  
133.30  
129.09  
127.39  
123.89  
123.74  
123.64  
121.08  
120.36  
119.83  
119.49  
115.39  
110.50

77.42  
77.10  
76.78

21.52

Current Data Parameters  
NAME 658  
EXPNO 2  
PROCNO 1

F2 - Acquisition Parameters  
Date\_ 20100507  
Time 10.50  
INSTRUM spect  
PROBHD 5 mm QNP 1H/13  
PULPROG zgpg30  
TD 65536  
SOLVENT CDCl3  
NS 749  
DS 4  
SWH 23980.814 Hz  
FIDRES 0.365918 Hz  
AQ 1.3664756 sec  
RG 1824.6  
DW 20.850 usec  
DE 6.00 usec  
TE 295.2 K  
D1 2.00000000 sec  
d11 0.03000000 sec  
DELTA 1.89999998 sec  
TD0 1

==== CHANNEL f1 =====  
NUC1 13C  
P1 9.38 usec  
PL1 0.00 dB  
SFO1 100.6228298 MHz

==== CHANNEL f2 =====  
CPDPRG2 waltz16  
NUC2 1H  
PCPD2 90.00 usec  
PL2 0.00 dB  
PL12 16.10 dB  
PL13 19.00 dB  
SFO2 400.1316005 MHz

F2 - Processing parameters  
SI 32768  
SF 100.6127690 MHz  
WDW EM  
SSB 0  
LB 1.00 Hz  
GB 0  
PC 5.00

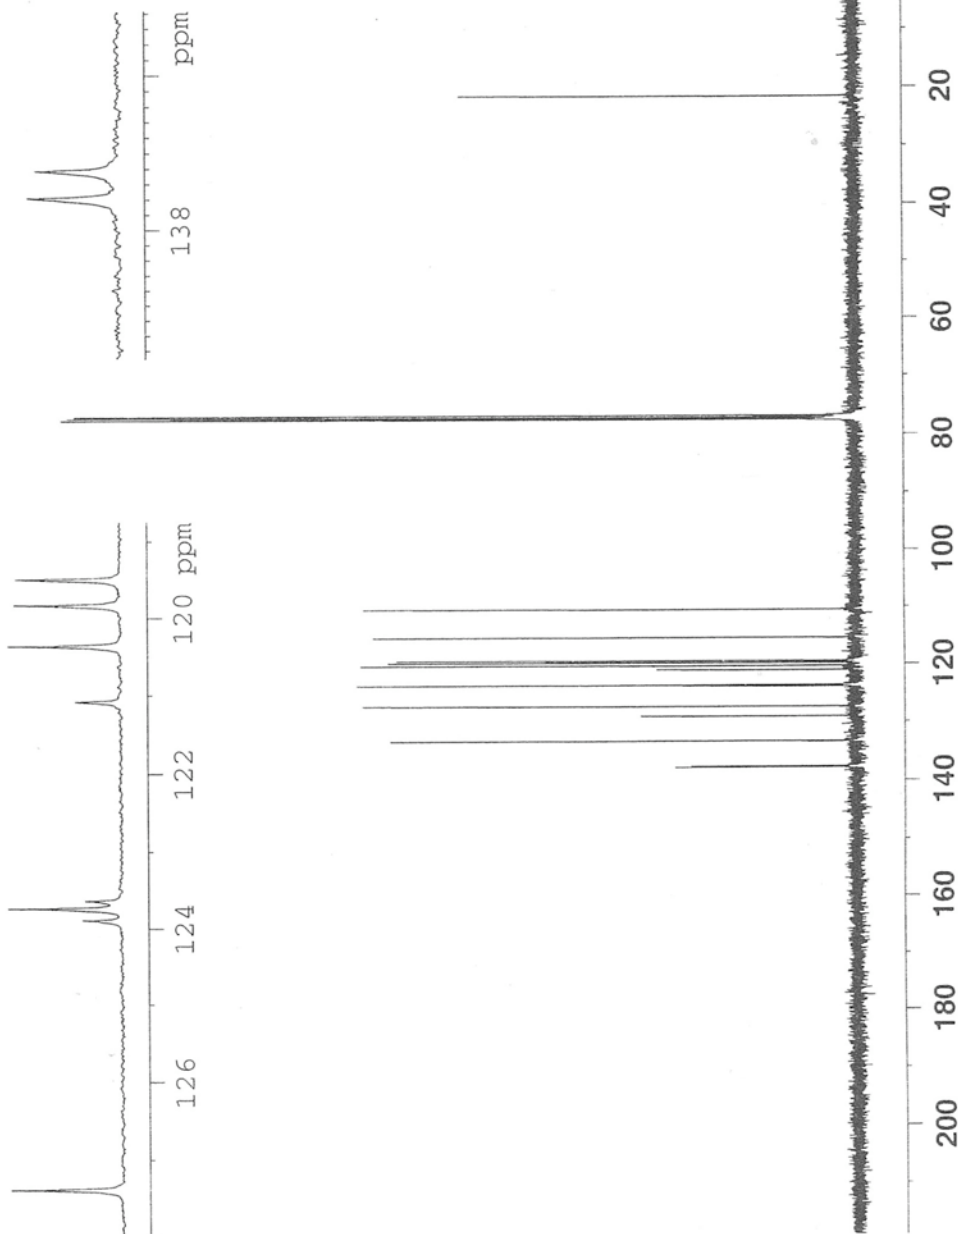

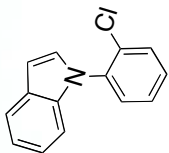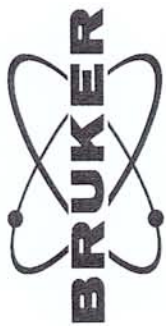

Current Data Parameters  
 NAME 678-1  
 EXPNO 1  
 PROCNO 1

F2 - Acquisition Parameters  
 Date\_ 20100524  
 Time 13.38  
 INSTRUM spect  
 PROBD 5 mm QNP 1H/13  
 PULPROG zg30  
 TD 65536  
 SOLVENT CDCl3  
 NS 13  
 DS 2  
 SWH 8278.146 Hz  
 FIDRES 0.126314 Hz  
 AQ 3.9584243 sec  
 RG 256  
 DW 60.400 usec  
 DE 6.00 usec  
 TE 294.2 K  
 D1 1.00000000 sec  
 TD0 1

===== CHANNEL f1 =====  
 NUC1 1H  
 P1 14.00 usec  
 PL1 0.00 dB  
 SFO1 400.1324710 MHz

F2 - Processing parameters  
 SI 65536  
 SF 400.1300220 MHz  
 WDW EM  
 SSB 0  
 LB 0.30 Hz  
 GB 0  
 PC 1.00

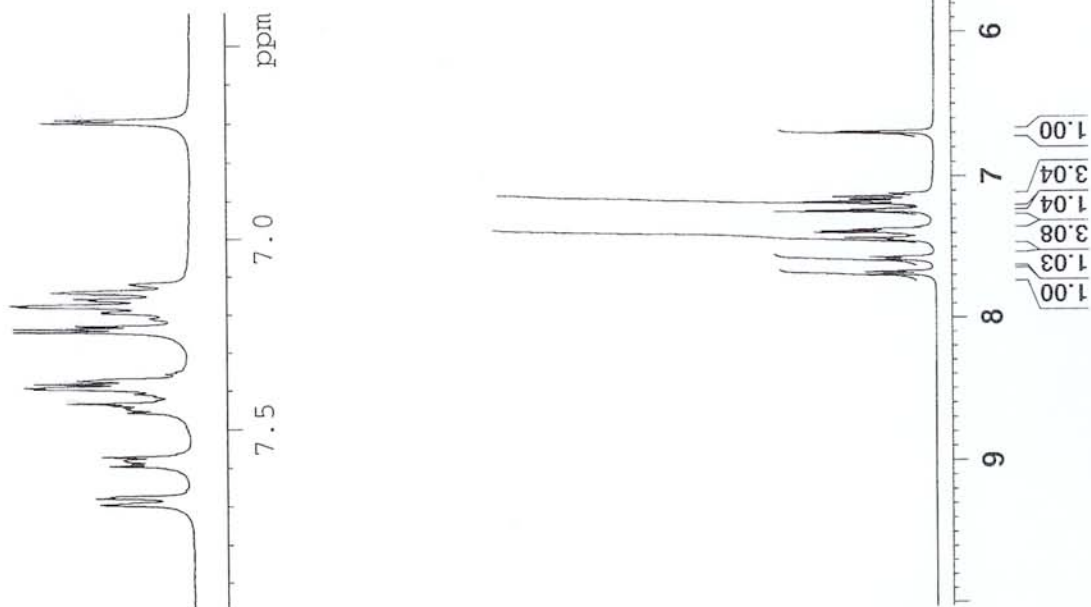

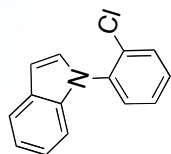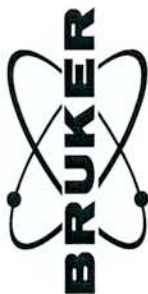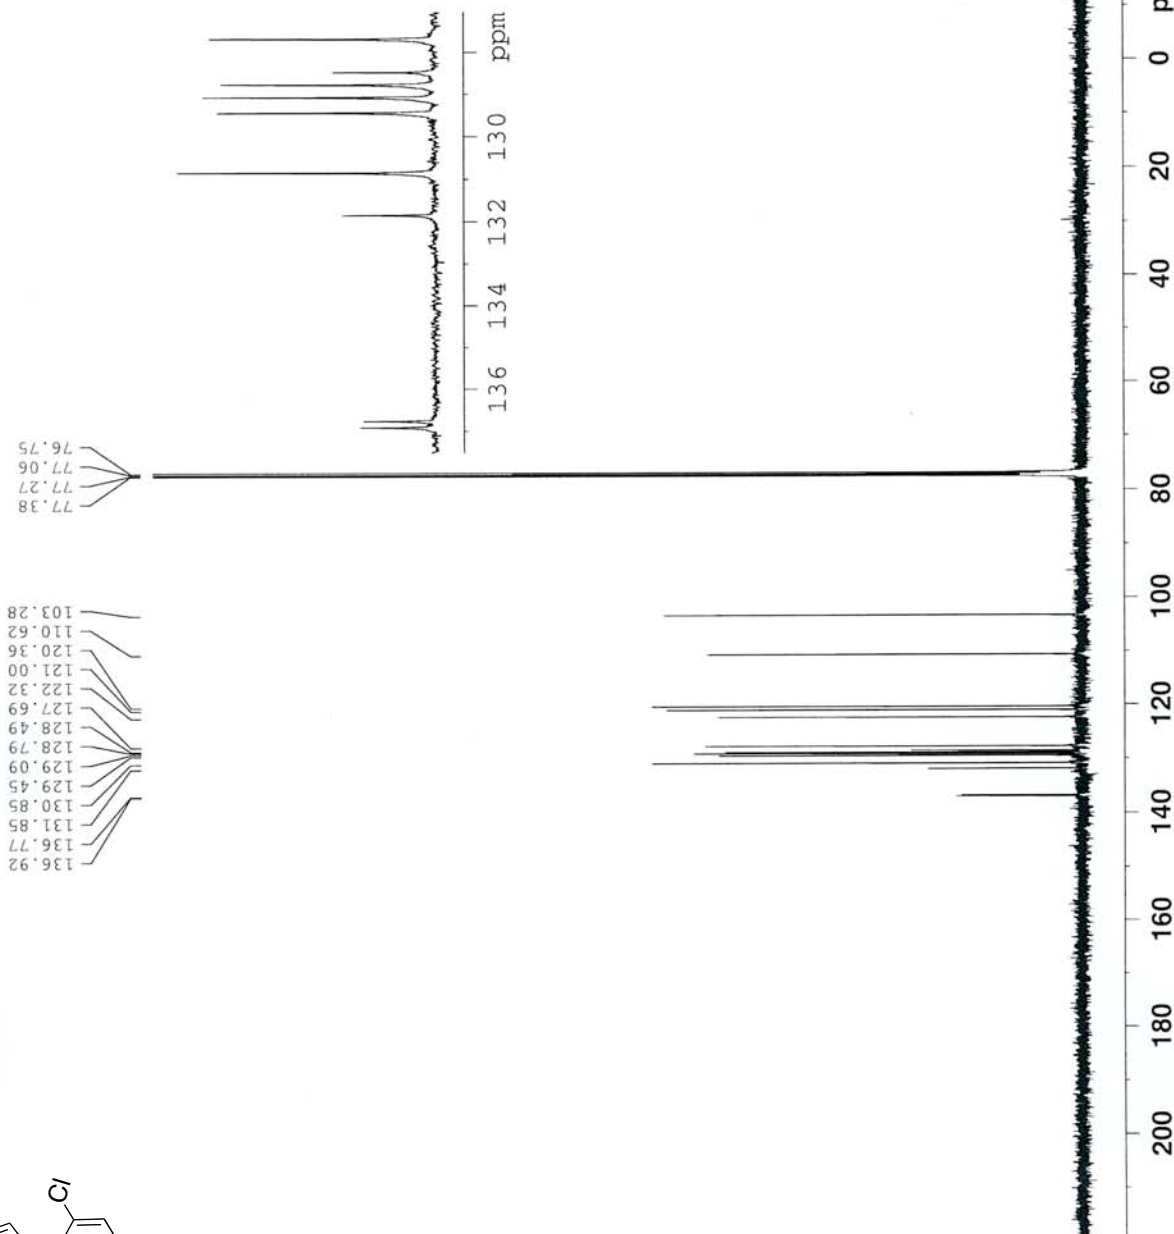

Current Data Parameters  
NAME 678-1  
EXPNO 3  
PROCNO 1

F2 - Acquisition Parameters  
Date\_ 20100525  
Time 8.42  
INSTRUM spect  
PROBHD 5 mm QNP 1H/13  
PULPROG zgpg30  
TD 65536  
SOLVENT CDCl3  
NS 1543  
DS 4  
SWH 23980.814 Hz  
FIDRES 0.365918 Hz  
AQ 1.3664756 sec  
RG 1824.6  
DW 20.850 usec  
DE 6.00 usec  
TE 295.2 K  
D1 2.0000000 sec  
d11 0.0300000 sec  
DELTA 1.8999998 sec  
TD0 1

===== CHANNEL f1 =====  
NUC1 13C  
P1 9.38 usec  
PL1 0.00 dB  
SFO1 100.6228298 MHz

===== CHANNEL f2 =====  
CPDPRG2 waltz16  
NUC2 1H  
PCPD2 90.00 usec  
PL2 0.00 dB  
PL12 16.10 dB  
PL13 19.00 dB  
SFO2 400.1316005 MHz

F2 - Processing parameters  
SI 32768  
SF 100.6127690 MHz  
WDW EM  
SSB 0  
LB 1.00 Hz  
GB 0  
PC 1.60

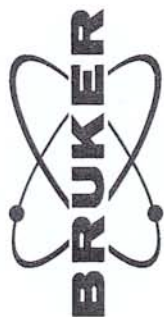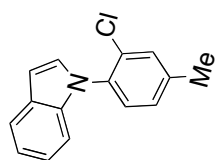

Current Data Parameters  
NAME ind-4 fr1  
EXPNO 1  
PROCNO 1

F2 - Acquisition Parameters  
Date\_ 20100512  
Time 7.57  
INSTRUM spect  
PROBHD 5 mm QNP 1H/13  
PULPROG zg30  
TD 65536  
SOLVENT CDC13  
NS 43  
DS 2  
SWH 8278.146 Hz  
FIDRES 0.126314 Hz  
AQ 3.9584243 sec  
RG 256  
DW 60.400 usec  
DE 6.00 usec  
TE 294.2 K  
D1 1.00000000 sec  
TD0 1

==== CHANNEL f1 =====  
NUC1 1H  
P1 14.00 usec  
PL1 0.00 dB  
SFO1 400.1324710 MHz

F2 - Processing parameters  
SI 65536  
SF 400.1300220 MHz  
WDW EM  
SSB 0  
LB 0.30 Hz  
GB 0  
PC 1.00

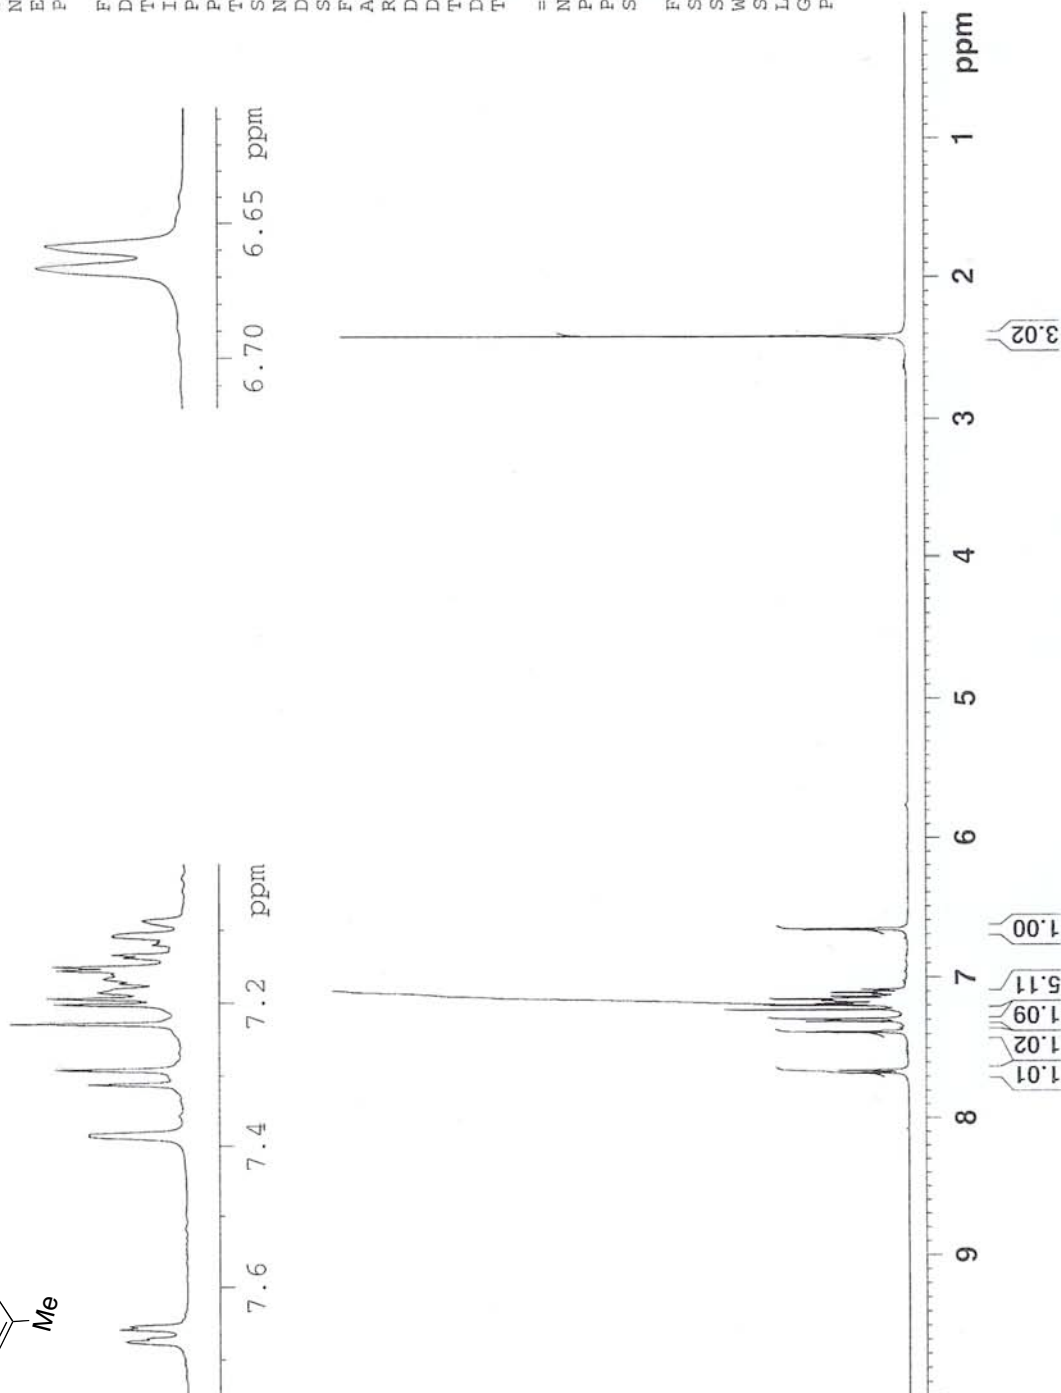

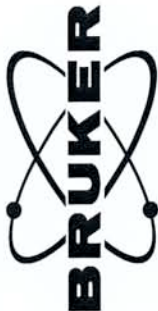

Current Data Parameters  
NAME ind-4 fr1  
EXPNO 2  
PROCNO 1

F2 - Acquisition Parameters  
Date\_ 20100512  
Time 8.45  
INSTRUM spect  
PROBHD 5 mm QNP 1H/13  
PULPROG zgpg30  
TD 65536  
SOLVENT CDCl3  
NS 600  
DS 4  
SWH 23980.814 Hz  
FIDRES 0.365918 Hz  
AQ 1.3664756 sec  
RG 1824.6  
DW 20.850 usec  
DE 6.00 usec  
TE 295.2 K  
D1 2.0000000 sec  
d11 0.0300000 sec  
DELTA 1.8999998 sec  
TD0 1

==== CHANNEL f1 =====  
NUC1 13C  
P1 9.38 usec  
PL1 0.00 dB  
SFO1 100.6228298 MHz

==== CHANNEL f2 =====  
CPDPRG2 waltz16  
NUC2 1H  
PCPD2 90.00 usec  
PL2 0.00 dB  
PL12 16.10 dB  
PL13 19.00 dB  
SFO2 400.1316005 MHz

F2 - Processing parameters  
SI 32768  
SF 100.6127690 MHz  
WDW EM  
SSB 0  
LB 1.00 Hz  
GB 0  
PC 1.40

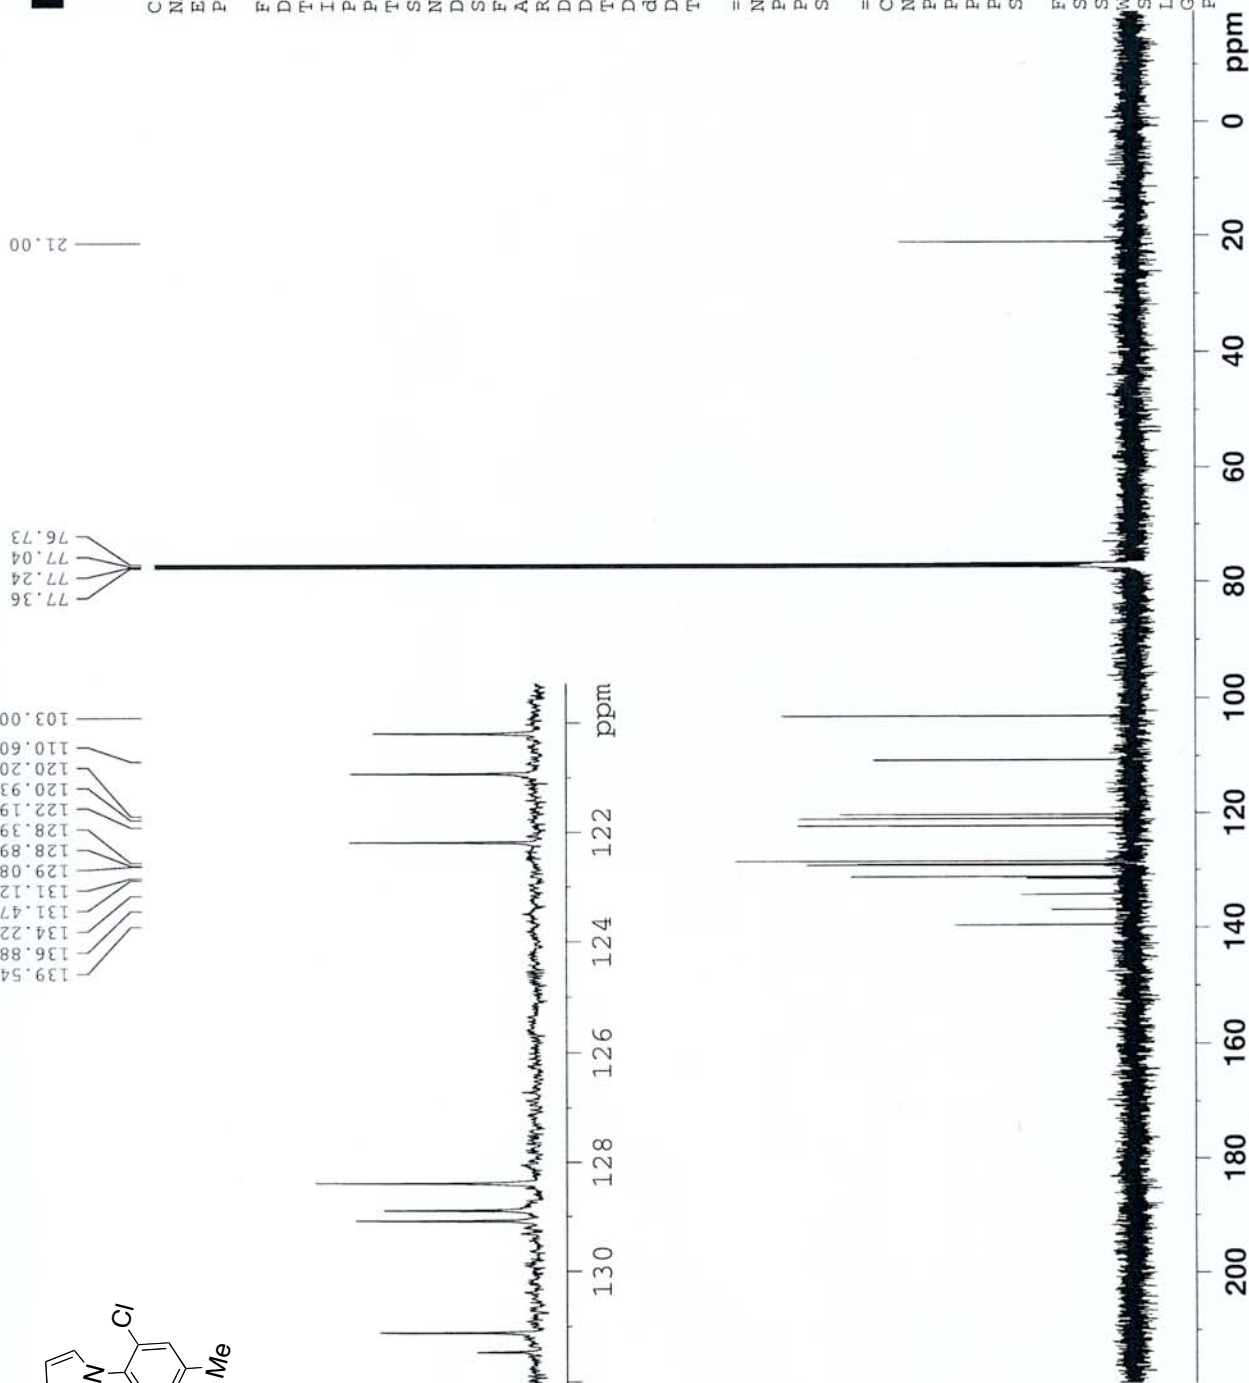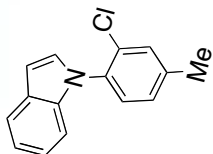

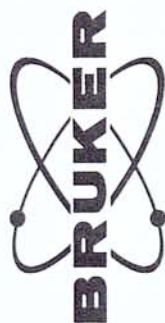

| F2 - Processing parameters |                 |
|----------------------------|-----------------|
| SI                         | 65536           |
| SF                         | 400.1300220 MHz |
| WDW                        | EM              |
| SSB                        | 0               |
| LB                         | 0.30 Hz         |
| GB                         | 0               |
| PC                         | 1.00            |

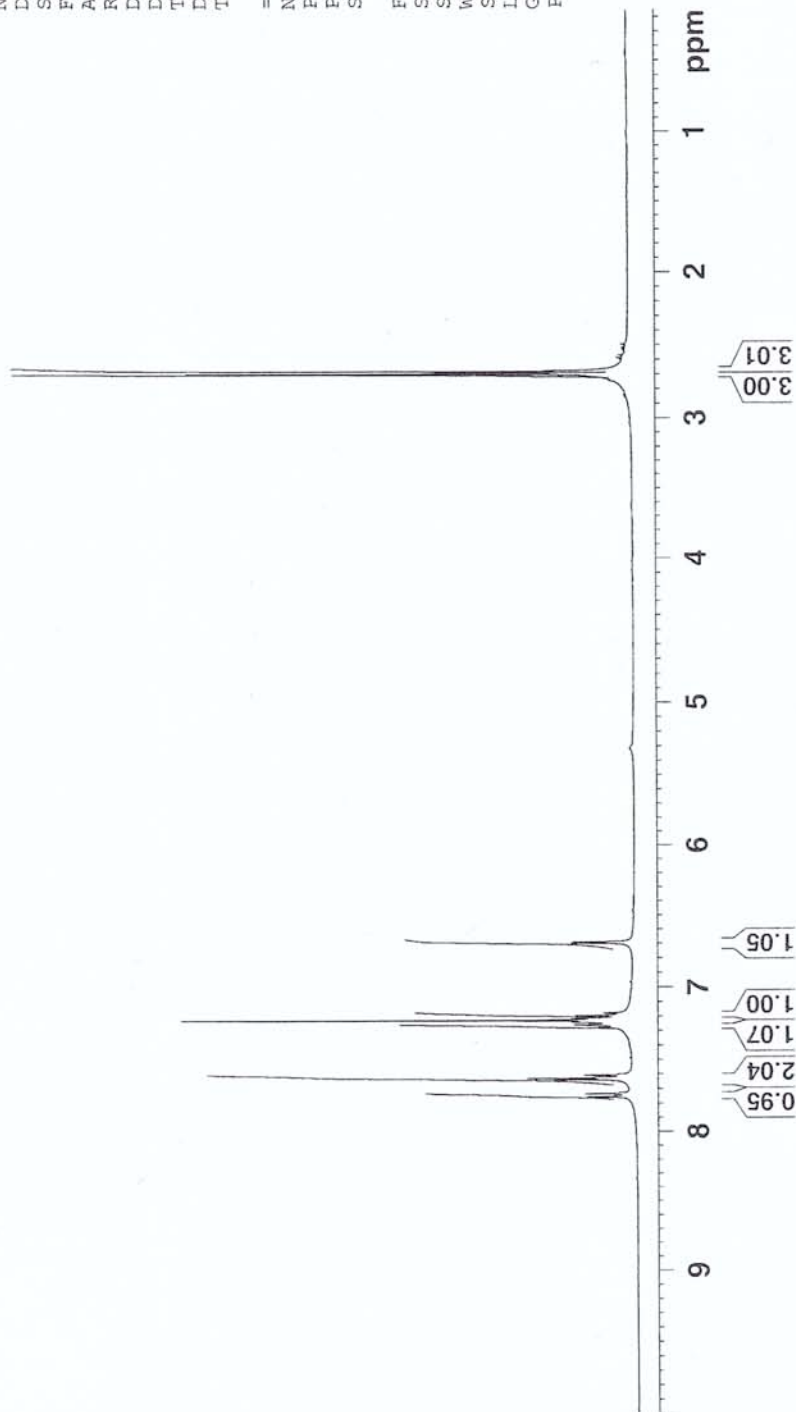

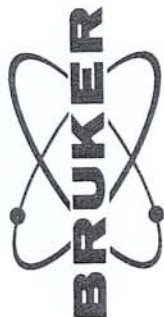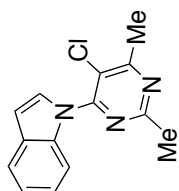

25.34  
23.26

77.35  
77.24  
77.03  
76.71

135.66  
129.67  
127.21  
123.30  
121.97  
121.07  
118.86  
113.50  
106.04

167.94  
165.18  
154.45

Current Data Parameters  
NAME ind2  
EXPNO 2  
PROCNO 1

F2 - Acquisition Parameters  
Date\_ 20100519  
Time 7.37  
INSTRUM spect  
PROBHD 5 mm QNP 1H/13  
PULPROG zgpg30  
TD 65536  
SOLVENT CDCl3  
NS 12838  
DS 4  
SWH 23980.814 Hz  
FIDRES 0.365918 Hz  
AQ 1.3664756 sec  
RG 1824.6  
DW 20.850 usec  
DE 6.00 usec  
TE 294.2 K  
D1 2.00000000 sec  
d11 0.03000000 sec  
DELTA 1.89999998 sec  
TD0 1

==== CHANNEL f1 =====  
NUC1 13C  
P1 9.38 usec  
PL1 0.00 dB  
SFO1 100.6228298 MHz

==== CHANNEL f2 =====  
CPDPRG2 waltz16  
NUC2 1H  
PCPD2 90.00 usec  
PL2 0.00 dB  
PL12 16.10 dB  
PL13 19.00 dB  
SFO2 400.1316005 MHz

F2 - Processing parameters  
SI 32768  
SF 100.6127690 MHz  
WDW EM  
SSB 0  
LB 1.00 Hz  
GB 0  
PC 1.40

200 180 160 140 120 100 80 60 40 20 0 ppm
